# Supplementary material for: An Immunoinformatics Approach for Identifying and Designing Conserved Multi-Epitope Vaccines for Coronaviruses
Source: Preprints.org preprint supplement (doi:10.20944/preprints202409.0239.v1), 2024-09-03



SARS-CoV-2-Wuhan-Hu-1\_spike/1-1273 MFVFLVLLPLVSSQCVNLTTRTQLPPAYTNSFTRGVYYPDKVFRSS  
 S-epi1/1-39 - - - - -  
 S-epi2/1-34 - - - - -

## Conservation

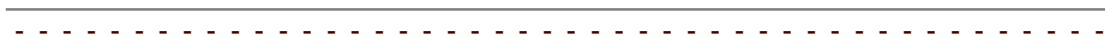

## Quality

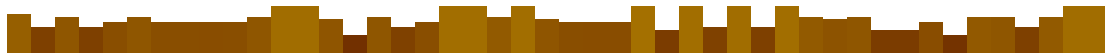

## Consensus

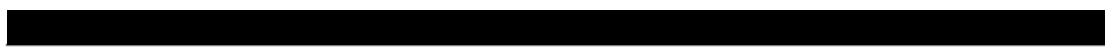

MFVFLVLLPLVSSQCVNL TTRTQLPPAYTNSFTRGVYYPDKVFRSS

Occupancy

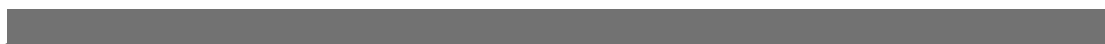

SARS-CoV-2-Wuhan-Hu-1\_spike/1-1273 VLHSTQDLFLPFFSNVTWFHAIHVS GTNGTKRFDNPVLPFNDGVYF  
 S-epi1/1-39 - - - - -  
 S-epi2/1-34 - - - - -

## Conservation

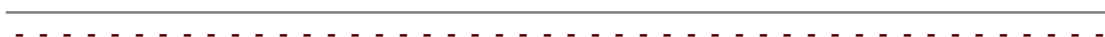

Quality

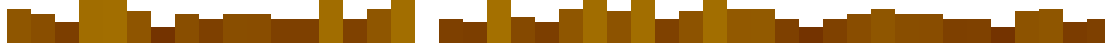

## Consensus

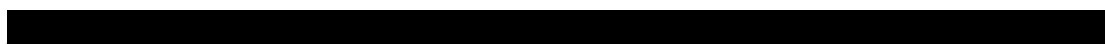

VLHSTQDLFLPFFSNVTWFHAIHVSGTNGTKRFDNPVLPFNDGVYF

Occupancy

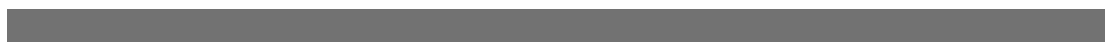

**SARS-CoV-2-Wuhan-Hu-1\_spike/1-1273** A S T E K S N I I R G W I F G T T L D S K T Q S L L I V N N A T N V V I K V C E F Q F C N D  
*S-epi1/1-39* - - - - -  
*S-epi2/1-34* - - - - -

## Conservation

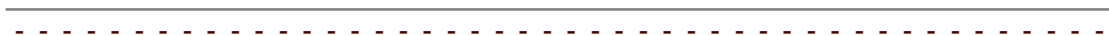

## Quality

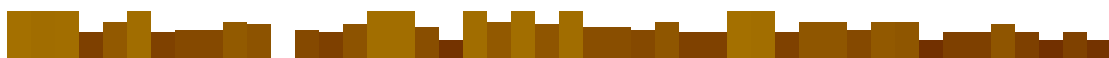

## Consensus

████████████████████████████████████████████████████████████████████████████████  
 ASTEKSNIIRGWIFGTTLDSKTQSLLIVNNATNVVIVKVC EFQFCND

Occupancy

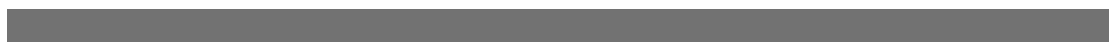

|                                           | 140F                                                                                        | 150K | 160Y | 170Y | 180E |
|-------------------------------------------|---------------------------------------------------------------------------------------------|------|------|------|------|
| <b>SARS-CoV-2-Wuhan-Hu-1_spike/1-1273</b> | P F L G V Y Y H K N N K S W M E S E F R V Y S S A N N C T F E Y V S Q P F L M D L E G K Q G |      |      |      |      |
| <i>S-epi1/1-39</i>                        | - - - - -                                                                                   |      |      |      |      |
| <i>S-epi2/1-34</i>                        | - - - - -                                                                                   |      |      |      |      |

## Conservation

## Quality

## Consensus

Occupancy

**SARS-CoV-2-Wuhan-Hu-1\_spike/1-1273**

N F K N L R E F V F K N I D G Y F K I Y S K H T P I N L V R D L P Q G F S A L E P L V D L P

*S-epi1/1-39*

- - - - -

*S-epi2/1-34*

- - - - -

## Conservation

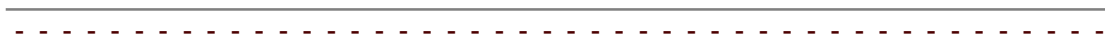

Quality

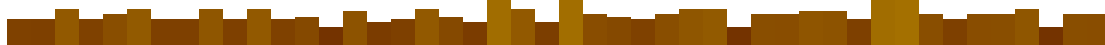

## Consensus

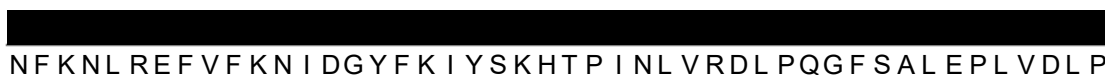

Occupancy



[illegible]

## Conservation

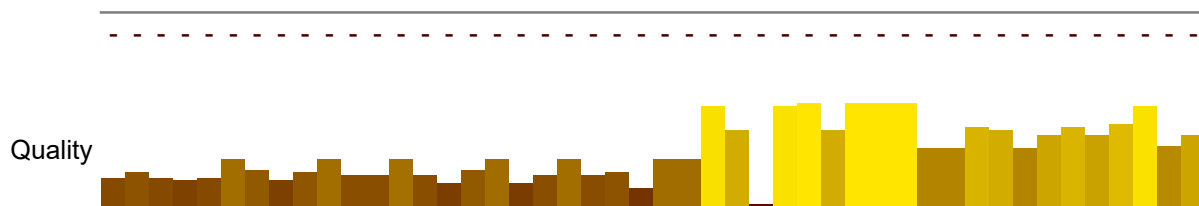

## Consensus

IGINITRFQTLALHRSYLT PGDSSSGWTAGAAAYYVGYLQPRTF

Occupancy

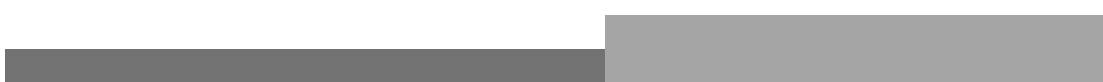



|                                           | 280N                | 290D                         | 300K | 310K | 320V |
|-------------------------------------------|---------------------|------------------------------|------|------|------|
| <b>SARS-CoV-2-Wuhan-Hu-1_spike/1-1273</b> | L KYNENGTITDAVDCALD | PLSETKCTLKSFTVEKGIYQTSNFRVQP |      |      |      |
| <i>S-epi1/1-39</i>                        | L KYNENGTITDAVDCALD | - - - - -                    |      |      |      |
| <i>S-epi2/1-34</i>                        | - - - - -           | - - - - -                    |      |      |      |

## Conservation

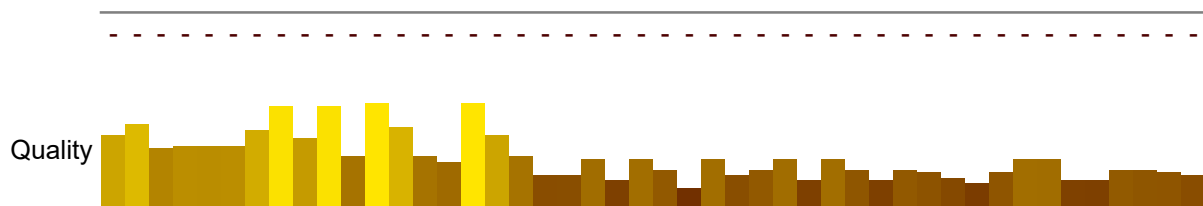

## Consensus

L KYNENGT I TDAVDCAL DPL SETKCTL KSFTVEKG I YQTSNFRVQP

Occupancy

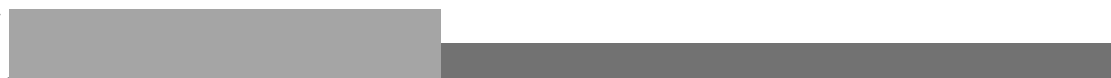

**SARS-CoV-2-Wuhan-Hu-1\_spike/1-1273** T E S I V R F P N I T N L C P F G E V F N A T R F A S V Y A W N R K R I S N C V A D Y S V L  
S-epi1/1-39 - - - - -  
S-epi2/1-34 - - - - -

## Conservation



## Quality

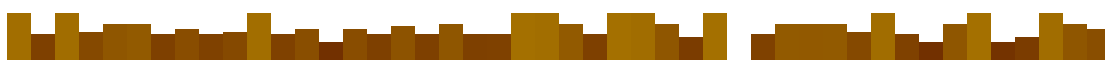

## Consensus

TESIVRFPNITNLCPFGEVFNATRFASVYAWNRKRISNCVADYSVL

Occupancy





**SARS-CoV-2-Wuhan-Hu-1\_spike/1-1273**

*S-epi1/1-39*

*S-epi2/1-34*

## Conservation

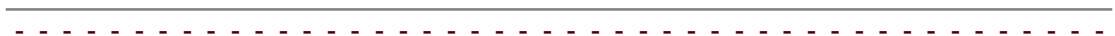

## Quality

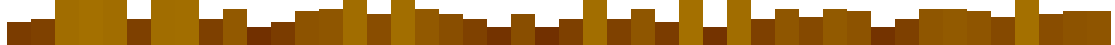

## Consensus

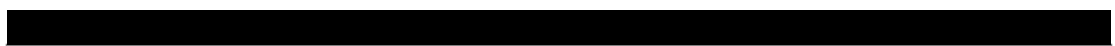

YNSASFSTFKCYGVSP TKLNDLCFTNVYADSFVIRGDEV RQIAPGQ

Occupancy

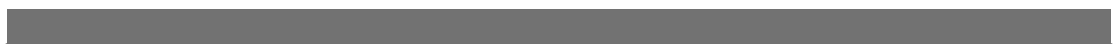

**SARS-CoV-2-Wuhan-Hu-1\_spike/1-1273**

T G K I A D Y N Y K L P D D F T G C V I A W N S N N L D S K V G G N Y N Y L Y R L F R K S N

*S-epi1/1-39*

- - - - -

*S-epi2/1-34*

- - - - -

## Conservation



## Quality

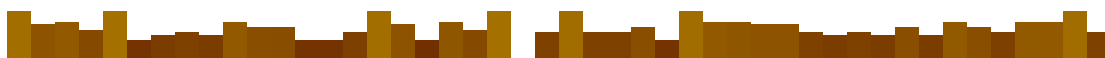

## Consensus

TGKIADYNYKL PDDFTGCVIAWNSNNLDSKVGGNYNYLYRLFRKSN

Occupancy



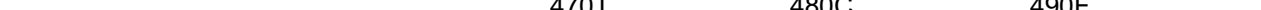

## Conservation

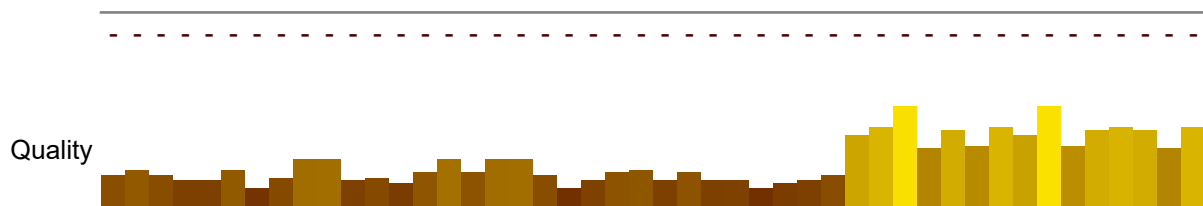

## Consensus

L K P F E R D I S T E I Y Q A G S T P C N G V E G F N C Y F P L Q S Y G F Q P T N G V G Y Q

Occupancy

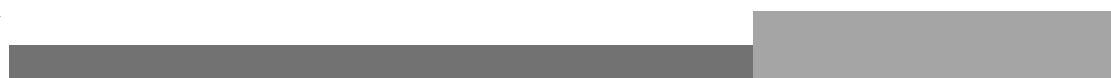

SARS-CoV-2-Wuhan-Hu-1\_spike/1-1273    510V    520A    530S    540N    550G  
S-epi1/1-39    - - - - -  
S-epi2/1-34    PYRVVVL SFELL HAPATVC - - - - -

Conservation

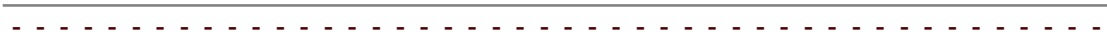

Quality

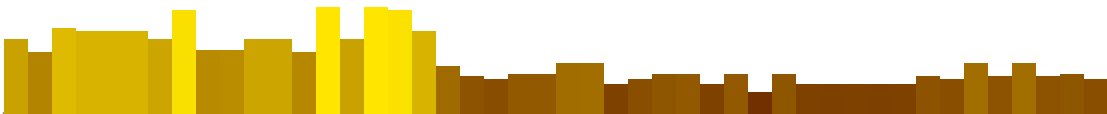

Consensus

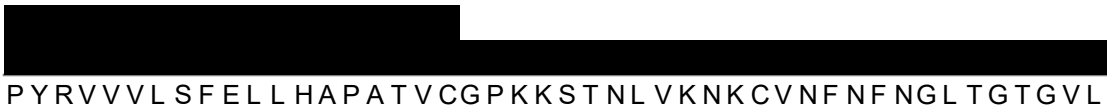

Occupancy

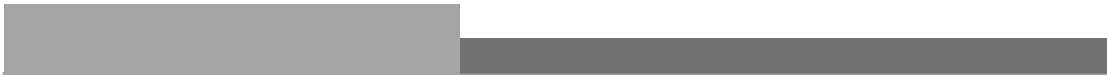

**SARS-CoV-2-Wuhan-Hu-1\_spike/1-1273**

T E S N K K F L P F Q Q F G R D I A D T T D A V R D P Q T L E I L D I T P C S F G G V S V I

*S-epi1/1-39*

- - - - -

*S-epi2/1-34*

- - - - -

## Conservation



## Quality

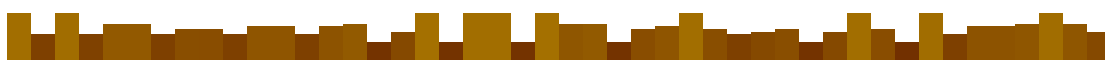

## Consensus

TESNKKFLPFQQFGRDIADTTDAVRDPQTLEILDITPCSFGGVSVI

Occupancy



**SARS-CoV-2-Wuhan-Hu-1\_spike/1-1273**

T P G T N T S N Q V A V L Y Q D V N C T E V P V A I H A D Q L T P T W R V Y S T G S N V F Q

*S-epi1/1-39*

- - - - -

*S-epi2/1-34*

- - - - -

## Conservation



## Quality

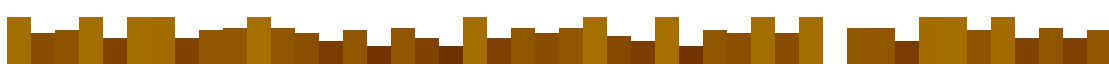

## Consensus

TPGTNTSNQVAVLYQDVNCTEVPVAIHADQLTPTWRVYSTGSNVFQ

Occupancy

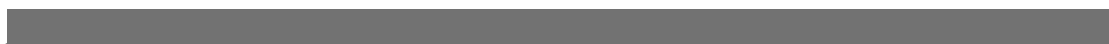

|
|
650L
|
660Y
|
670I
|
680S
|

**SARS-CoV-2-Wuhan-Hu-1\_spike/1-1273**
T R A G C L I G A E H V N N S Y E C D I P I G A G I C A S Y Q T Q T N S P R R A R S V A S Q

*S-epi1/1-39*
- - - - -

*S-epi2/1-34*
- - - - -

## Conservation



## Quality

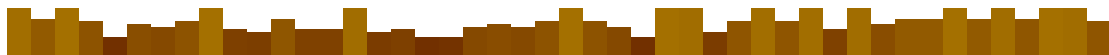

## Consensus

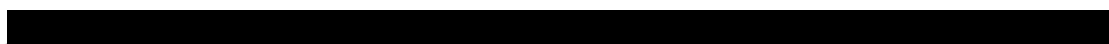

TRAGCLIGAEHVNNSECDIPIGAGICASYQTQTNSPRRRARSVASQ

Occupancy

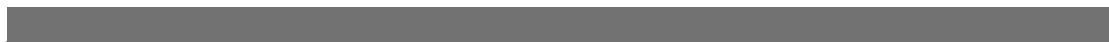

| Sequence                           | 700G | 710N | 720I | 730S |
|------------------------------------|------|------|------|------|
| SARS-CoV-2-Wuhan-Hu-1_spike/1-1273 | S    | I    | A    | I    |
| S-epi1/1-39                        | -    | -    | -    | -    |
| S-epi2/1-34                        | -    | -    | -    | -    |

## Conservation



## Quality

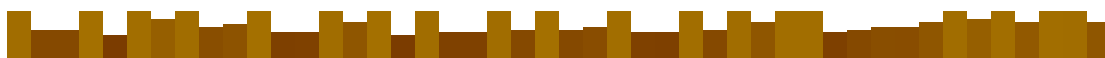

## Consensus

S I I A Y T M S L G A E N S V A Y S N N S I A I P T N F T I S V T T E I L P V S M T K T S V

Occupancy

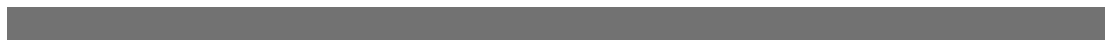



**SARS-CoV-2-Wuhan-Hu-1\_spike/1-1273**

DCTMYICGDSTEC SNLLQYGSFCTQLNRALTGIAVEQDKNTQE VF

*S-epi1/1-39*

- - - - -

*S-epi2/1-34*

- - - - -

## Conservation

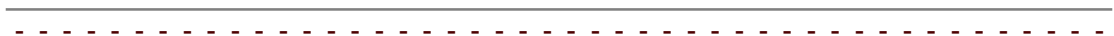

Quality

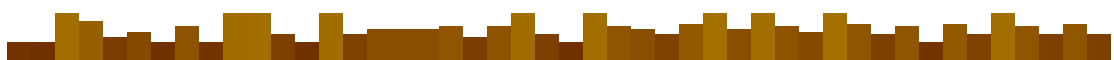

## Consensus

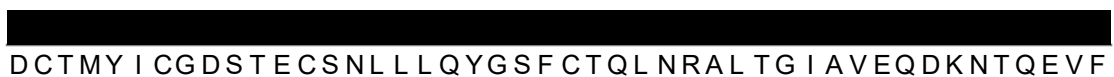

Occupancy

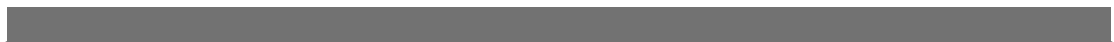

**SARS-CoV-2-Wuhan-Hu-1\_spike/1-1273**

AQVKQ I YKTPP I KDFGGFNFSQ I L PDP SKPSKR S F I EDLLFNKVTL

*S-epi1/1-39*

- - - - -

*S-epi2/1-34*

- - - - -

## Conservation



## Quality

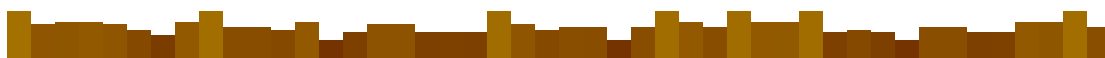

## Consensus

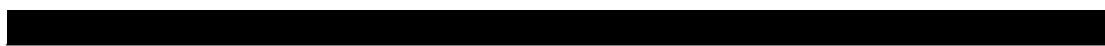

AQVKQ I YKTPP I KDFGGF NF SQ I L PDPSKPSKRSF I EDLL FNKVTL

Occupancy

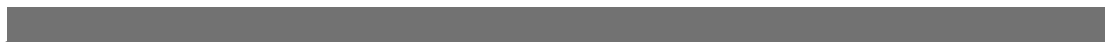

## Conservation



## Quality

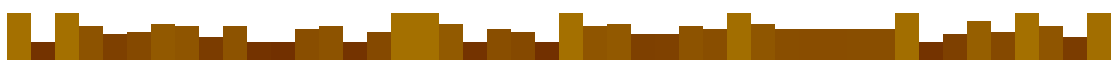

## Consensus

ADAGF I KQYGDCLGDI AARDL I CAQKFNGLT VLPPL LTDEMI AQYT

Occupancy

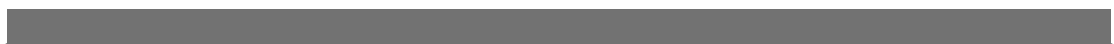

**SARS-CoV-2-Wuhan-Hu-1\_spike/1-1273**

*S-epi1/1-39*

*S-epi2/1-34*

## Conservation

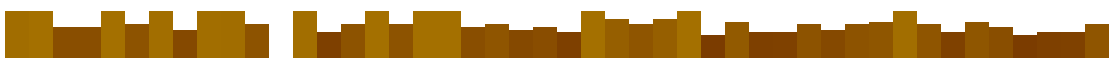

## Consensus

SALLAGTITSGWTFGAGAALQIPFAMQMAYRFNGIGVTQNVLYENQ

Occupancy

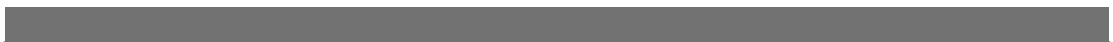

|                                           | 930A                                                    | 940S | 950D | 960N |
|-------------------------------------------|---------------------------------------------------------|------|------|------|
| <b>SARS-CoV-2-Wuhan-Hu-1_spike/1-1273</b> | KL I ANQF NSA I GK I QDSL S STASALGKLQDVVNQNAQALNTLVKQL |      |      |      |
| <i>S-epi1/1-39</i>                        | - - - - -                                               |      |      |      |
| <i>S-epi2/1-34</i>                        | - - - - -                                               |      |      |      |

## Conservation

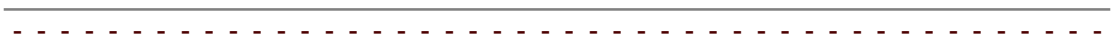

Quality

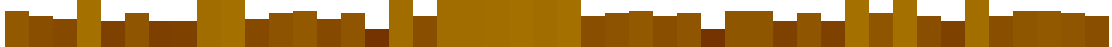

## Consensus

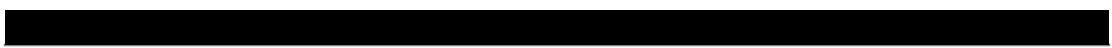

KL I ANQFNSA I GK I QDSL SSTASALGKLQDVVNQNAQALNTLVKQL

Occupancy

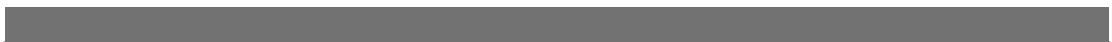

## Conservation

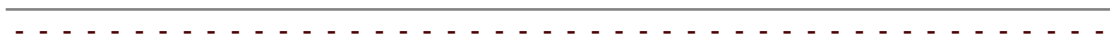

## Quality

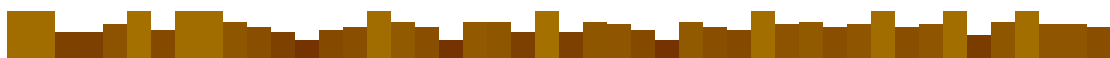

## Consensus

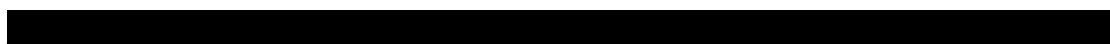

SSNFGA I SSVL ND I L SRL DKVEAEVQ I DRL I TGRL QSL QTYVTQQL

Occupancy

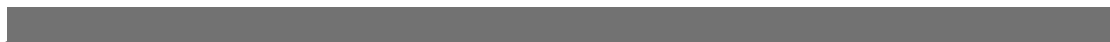

**SARS-CoV-2-Wuhan-Hu-1\_spike/1-1273** I R A A E I R A S A N L A A T K M S E C V L G Q S K R V D F C G K G Y H L M S F P Q S A P H  
S-epi1/1-39 - - - - -  
S-epi2/1-34 - - - - -

## Conservation



Quality

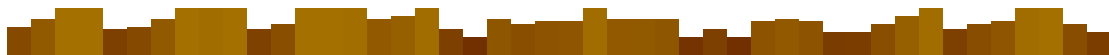

## Consensus

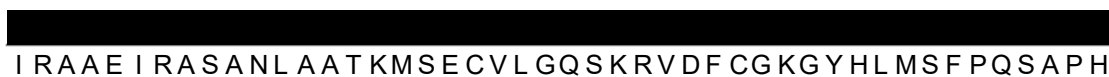

Occupancy



**SARS-CoV-2-Wuhan-Hu-1\_spike/1-1273**

G V V F L H V T Y V P A Q E K N F T T A P A I C H D G K A H F P R E G V F V S N G T H W F V

*S-epi1/1-39*

- - - - -

*S-epi2/1-34*

- - - - -

## Conservation



## Quality

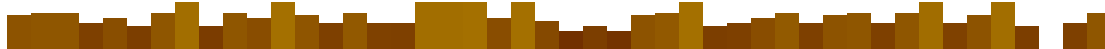

## Consensus

GVVFLHVTYVPAQEKNFTTAPAICHDGKAHFPREGVFVSNGTHWVF

Occupancy





|
|
1110Y
|
1120T
|
1130I
|
1140P
|

**SARS-CoV-2-Wuhan-Hu-1\_spike/1-1273** TQRNFYEPQ I I TTDNTFVSGNCDVV I G I VNNNTVYDPLQPELDSFKE

*S-epi1/1-39* - - - - -

*S-epi2/1-34* - - - - -

## Conservation



## Quality

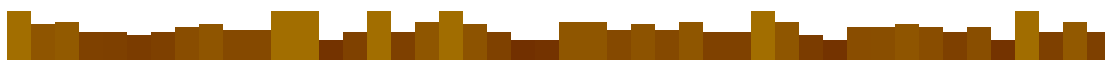

## Consensus



TQRNFYEPQ I I TTDNTFVSGNCDVV I G I VNNTVYDPLQPELDSFKE

Occupancy



1160T
1170S
1180Q
1190A

**SARS-CoV-2-Wuhan-Hu-1\_spike/1-1273** ELDKYFKNHTSPDVDLGDISGINASVVNIQKEIDRLNEVAKNLNES

*S-epi1/1-39* - - - - -

*S-epi2/1-34* - - - - -

## Conservation



## Quality

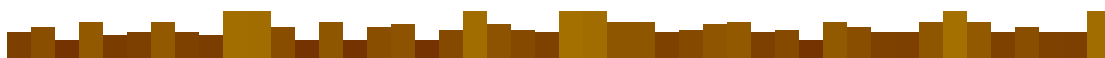

## Consensus



ELDKYFKNHTSPDVDLGDISGINASVVNIQKEIDRLNEVAKNLES

Occupancy



## Conservation

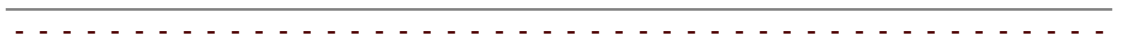

## Quality

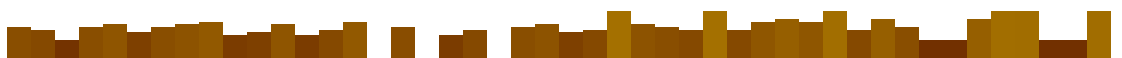

## Consensus

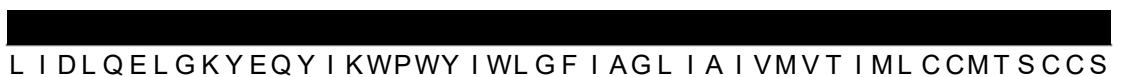

Occupancy

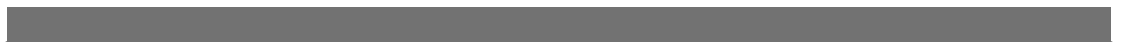

**SARS-CoV-2-Wuhan-Hu-1\_spike/1-1273** CLKGCCSCGSCCKFDEDDSEPV LKGVKLHYT  
*S-epi1/1-39* - - - - - - - - - - - - - - - - - -  
*S-epi2/1-34* - - - - - - - - - - - - - - - - - -

## Conservation

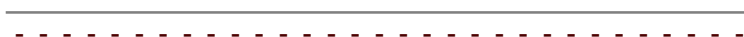

## Quality

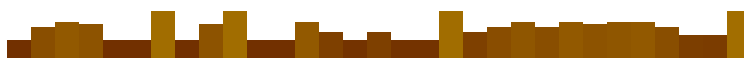

## Consensus

[illegible]

Occupancy

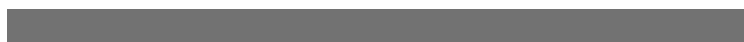

Supplement: Supplementary file 1 [file supplementary]
