# Supplementary material for: An Immunoinformatics Approach for Identifying and Designing Conserved Multi-Epitope Vaccines for Coronaviruses
Source: Preprints.org preprint supplement (doi:10.20944/preprints202409.0239.v1), 2024-09-03

|  | -1 |  |  |  |  |  |  |  | 9P |  |  |  |  |  |  | 14- |  |  |  |  |  |  |  |  |  |  |  |  |  |  |  |  |  |  |  |  |  |  |  |  |  |  |  |  |  |  |  |  |  |  |  |  |  |  |  |  |  |  |  |  |  |  |  |  |  |  |  |  |  |  |  |  |  |  |  |  |  |  |  |  |  |  |  |  |  |  |  |  |  |  |  |  |  |  |  |  |  |  |  |  |  |  |  |  |  |  |  |  |  |  |  |  |  |  |  |  |  |  |  |  |  |  |  |  |  |  |  |  |  |  |  |  |  |  |  |  |  |  |  |  |  |  |  |  |  |  |  |  |  |  |  |  |  |  |  |  |  |  |  |  |  |  |  |  |  |  |  |  |  |  |  |  |  |  |  |  |  |  |  |  |  |  |  |  |  |  |  |  |  |  |  |  |  |  |  |  |  |  |  |  |  |  |  |  |  |  |  |  |  |  |  |  |  |  |  |  |  |  |  |  |  |  |  |  |  |  |  |  |  |  |  |  |  |  |  |  |  |  |  |  |  |  |  |  |  |  |  |  |  |  |  |  |  |  |  |  |  |  |  |  |  |  |  |  |  |  |  |  |  |  |  |  |  |  |  |  |  |  |  |  |  |  |  |  |  |  |  |  |  |  |  |  |  |  |  |  |  |  |  |  |  |  |  |  |  |  |  |  |  |  |  |  |  |  |  |  |  |  |  |  |  |  |  |  |  |  |  |  |  |  |  |  |  |  |  |  |  |  |  |  |  |  |  |  |  |  |  |  |  |  |  |  |  |  |  |  |  |  |  |  |  |  |  |  |  |  |  |  |  |  |  |  |  |  |  |  |  |  |  |  |  |  |  |  |  |  |  |  |  |  |  |  |  |  |  |  |  |  |  |  |  |  |  |  |  |  |  |  |  |  |  |  |  |  |  |  |  |  |  |  |  |  |  |  |  |  |  |  |  |  |  |  |  |  |  |  |  |  |  |  |  |  |  |  |  |  |  |  |  |  |  |  |  |  |  |  |  |  |  |  |  |  |  |  |  |  |  |  |  |  |  |  |  |  |  |  |  |  |  |  |  |  |  |  |  |  |  |  |  |  |  |  |  |  |  |  |  |  |  |  |  |  |  |  |  |  |  |  |  |  |  |  |  |  |  |  |  |  |  |  |  |  |  |  |  |  |  |  |  |  |  |  |  |  |  |  |  |  |  |  |  |  |  |  |  |  |  |  |  |  |  |  |  |  |  |  |  |  |  |  |  |  |  |  |  |  |  |  |  |  |  |  |  |  |  |  |  |  |  |  |  |  |  |  |  |  |  |  |  |  |  |  |  |  |  |  |  |  |  |  |  |  |  |  |  |  |  |  |  |  |  |  |  |  |  |  |  |  |  |  |  |  |  |  |  |  |  |  |  |  |  |  |  |  |  |  |  |  |  |  |  |  |  |  |  |  |  |  |  |  |  |  |  |  |  |  |  |  |  |  |  |  |  |  |  |  |  |  |  |  |  |  |  |  |  |  |  |  |  |  |  |  |  |  |  |  |  |  |  |  |  |  |  |  |  |  |  |  |  |  |  |  |  |  |  |  |  |  |  |  |  |  |  |  |  |  |  |  |  |  |  |  |  |  |  |  |  |  |  |  |  |  |  |  |  |  |  |  |  |  |  |  |  |  |  |  |  |  |  |  |  |  |  |  |  |  |  |  |  |  |  |  |  |  |  |  |  |  |  |  |  |  |  |  |  |  |  |  |  |  |  |  |  |  |  |  |  |  |  |  |  |  |  |  |  |  |  |  |  |  |  |  |  |  |  |  |  |  |  |  |  |  |  |  |  |  |  |  |  |  |  |  |  |  |  |  |  |  |  |  |  |  |  |  |  |  |  |  |  |  |  |  |  |  |  |  |  |  |  |  |  |  |  |  |  |  |  |  |  |  |  |  |  |  |  |  |  |  |  |  |  |  |  |  |  |  |  |  |  |  |  |  |  |  |  |  |  |  |  |  |  |  |  |  |  |  |  |  |  |  |  |  |  |  |  |  |  |  |  |  |  |  |  |  |  |  |  |  |  |  |  |  |  |  |  |  |  |  |  |  |  |  |  |  |  |  |  |  |  |  |  |  |  |  |  |  |  |  |  |  |  |  |  |  |  |  |  |  |  |  |  |  |  |  |  |  |  |  |  |  |  |  |  |  |  |  |  |  |  |  |  |  |  |  |  |  |  |  |  |  |  |  |  |  |  |  |  |  |  |  |  |  |  |  |  |  |  |  |  |  |  |  |  |  |  |  |  |  |  |  |  |  |  |  |  |  |  |  |  |  |  |  |  |  |  |  |  |  |  |  |  |  |  |  |  |  |  |  |  |  |  |  |  |  |  |  |  |  |  |  |  |  |  |  |  |  |  |  |  |  |  |  |  |  |  |  |  |  |  |  |  |  |  |  |  |  |  |  |  |  |  |  |  |  |  |  |  |  |  |  |  |  |  |  |  |  |  |  |  |  |  |  |  |  |  |  |  |  |  |  |  |  |  |  |  |  |  |  |  |  |  |  |  |  |  |  |  |  |  |  |  |  |  |  |  |  |  |  |  |  |  |  |  |  |  |  |  |  |  |  |  |  |  |  |  |  |  |  |  |  |  |  |  |  |  |  |  |  |  |  |  |  |  |  |  |  |  |  |  |  |  |  |  |  |  |  |  |  |  |  |  |  |  |  |  |  |  |  |  |  |  |  |  |  |  |  |  |  |  |  |  |  |  |  |  |  |  |  |  |  |  |  |  |  |  |  |  |  |  |  |  |  |  |  |  |  |  |  |  |  |  |  |  |  |  |  |  |  |  |  |  |  |  |  |  |  |  |  |  |  |  |  |  |  |  |  |  |  |  |  |  |  |  |  |  |  |  |  |  |  |  |  |  |  |  |  |  |  |  |  |  |  |  |  |  |  |  |  |  |  |  |  |  |  |  |  |  |  |  |  |  |  |  |  |  |  |  |  |  |  |  |  |  |  |  |  |  |  |  |  |  |  |  |  |  |  |  |  |  |  |  |  |  |  |  |  |  |  |  |  |  |  |  |  |  |  |  |  |  |  |  |  |  | </ |
|--|----|--|--|--|--|--|--|--|----|--|--|--|--|--|--|-----|--|--|--|--|--|--|--|--|--|--|--|--|--|--|--|--|--|--|--|--|--|--|--|--|--|--|--|--|--|--|--|--|--|--|--|--|--|--|--|--|--|--|--|--|--|--|--|--|--|--|--|--|--|--|--|--|--|--|--|--|--|--|--|--|--|--|--|--|--|--|--|--|--|--|--|--|--|--|--|--|--|--|--|--|--|--|--|--|--|--|--|--|--|--|--|--|--|--|--|--|--|--|--|--|--|--|--|--|--|--|--|--|--|--|--|--|--|--|--|--|--|--|--|--|--|--|--|--|--|--|--|--|--|--|--|--|--|--|--|--|--|--|--|--|--|--|--|--|--|--|--|--|--|--|--|--|--|--|--|--|--|--|--|--|--|--|--|--|--|--|--|--|--|--|--|--|--|--|--|--|--|--|--|--|--|--|--|--|--|--|--|--|--|--|--|--|--|--|--|--|--|--|--|--|--|--|--|--|--|--|--|--|--|--|--|--|--|--|--|--|--|--|--|--|--|--|--|--|--|--|--|--|--|--|--|--|--|--|--|--|--|--|--|--|--|--|--|--|--|--|--|--|--|--|--|--|--|--|--|--|--|--|--|--|--|--|--|--|--|--|--|--|--|--|--|--|--|--|--|--|--|--|--|--|--|--|--|--|--|--|--|--|--|--|--|--|--|--|--|--|--|--|--|--|--|--|--|--|--|--|--|--|--|--|--|--|--|--|--|--|--|--|--|--|--|--|--|--|--|--|--|--|--|--|--|--|--|--|--|--|--|--|--|--|--|--|--|--|--|--|--|--|--|--|--|--|--|--|--|--|--|--|--|--|--|--|--|--|--|--|--|--|--|--|--|--|--|--|--|--|--|--|--|--|--|--|--|--|--|--|--|--|--|--|--|--|--|--|--|--|--|--|--|--|--|--|--|--|--|--|--|--|--|--|--|--|--|--|--|--|--|--|--|--|--|--|--|--|--|--|--|--|--|--|--|--|--|--|--|--|--|--|--|--|--|--|--|--|--|--|--|--|--|--|--|--|--|--|--|--|--|--|--|--|--|--|--|--|--|--|--|--|--|--|--|--|--|--|--|--|--|--|--|--|--|--|--|--|--|--|--|--|--|--|--|--|--|--|--|--|--|--|--|--|--|--|--|--|--|--|--|--|--|--|--|--|--|--|--|--|--|--|--|--|--|--|--|--|--|--|--|--|--|--|--|--|--|--|--|--|--|--|--|--|--|--|--|--|--|--|--|--|--|--|--|--|--|--|--|--|--|--|--|--|--|--|--|--|--|--|--|--|--|--|--|--|--|--|--|--|--|--|--|--|--|--|--|--|--|--|--|--|--|--|--|--|--|--|--|--|--|--|--|--|--|--|--|--|--|--|--|--|--|--|--|--|--|--|--|--|--|--|--|--|--|--|--|--|--|--|--|--|--|--|--|--|--|--|--|--|--|--|--|--|--|--|--|--|--|--|--|--|--|--|--|--|--|--|--|--|--|--|--|--|--|--|--|--|--|--|--|--|--|--|--|--|--|--|--|--|--|--|--|--|--|--|--|--|--|--|--|--|--|--|--|--|--|--|--|--|--|--|--|--|--|--|--|--|--|--|--|--|--|--|--|--|--|--|--|--|--|--|--|--|--|--|--|--|--|--|--|--|--|--|--|--|--|--|--|--|--|--|--|--|--|--|--|--|--|--|--|--|--|--|--|--|--|--|--|--|--|--|--|--|--|--|--|--|--|--|--|--|--|--|--|--|--|--|--|--|--|--|--|--|--|--|--|--|--|--|--|--|--|--|--|--|--|--|--|--|--|--|--|--|--|--|--|--|--|--|--|--|--|--|--|--|--|--|--|--|--|--|--|--|--|--|--|--|--|--|--|--|--|--|--|--|--|--|--|--|--|--|--|--|--|--|--|--|--|--|--|--|--|--|--|--|--|--|--|--|--|--|--|--|--|--|--|--|--|--|--|--|--|--|--|--|--|--|--|--|--|--|--|--|--|--|--|--|--|--|--|--|--|--|--|--|--|--|--|--|--|--|--|--|--|--|--|--|--|--|--|--|--|--|--|--|--|--|--|--|--|--|--|--|--|--|--|--|--|--|--|--|--|--|--|--|--|--|--|--|--|--|--|--|--|--|--|--|--|--|--|--|--|--|--|--|--|--|--|--|--|--|--|--|--|--|--|--|--|--|--|--|--|--|--|--|--|--|--|--|--|--|--|--|--|--|--|--|--|--|--|--|--|--|--|--|--|--|--|--|--|--|--|--|--|--|--|--|--|--|--|--|--|--|--|--|--|--|--|--|--|--|--|--|--|--|--|--|--|--|--|--|--|--|--|--|--|--|--|--|--|--|--|--|--|--|--|--|--|--|--|--|--|--|--|--|--|--|--|--|--|--|--|--|--|--|--|--|--|--|--|--|--|--|--|--|--|--|--|--|--|--|--|--|--|--|--|--|--|--|--|--|--|--|--|--|--|--|--|--|--|--|--|--|--|--|--|--|--|--|--|--|--|--|--|--|--|--|--|--|--|--|--|--|--|--|--|--|--|--|--|--|--|--|--|--|--|--|--|--|--|--|--|--|--|--|--|--|--|--|--|--|--|--|--|--|--|--|--|--|--|--|--|--|--|--|--|--|--|--|--|--|--|--|--|--|--|--|--|--|--|--|--|--|--|--|--|--|--|--|--|--|--|--|--|--|--|--|--|--|--|--|--|--|--|--|--|--|--|--|--|--|--|--|--|--|--|--|--|--|--|--|--|--|--|--|--|--|--|--|--|--|--|--|--|--|--|--|--|--|--|--|--|--|--|--|--|--|--|--|--|--|--|--|--|--|--|--|--|--|--|--|--|--|--|--|--|--|--|--|--|--|--|--|--|--|--|--|--|--|--|--|--|--|--|--|--|--|--|--|--|--|--|--|--|--|--|--|--|--|--|--|--|--|--|--|--|--|--|--|--|--|--|--|--|--|--|--|--|--|--|--|--|--|--|--|--|--|--|--|--|--|--|--|--|--|--|--|--|--|--|--|--|--|--|--|--|--|--|--|--|--|--|--|--|--|--|----|
|--|----|--|--|--|--|--|--|--|----|--|--|--|--|--|--|-----|--|--|--|--|--|--|--|--|--|--|--|--|--|--|--|--|--|--|--|--|--|--|--|--|--|--|--|--|--|--|--|--|--|--|--|--|--|--|--|--|--|--|--|--|--|--|--|--|--|--|--|--|--|--|--|--|--|--|--|--|--|--|--|--|--|--|--|--|--|--|--|--|--|--|--|--|--|--|--|--|--|--|--|--|--|--|--|--|--|--|--|--|--|--|--|--|--|--|--|--|--|--|--|--|--|--|--|--|--|--|--|--|--|--|--|--|--|--|--|--|--|--|--|--|--|--|--|--|--|--|--|--|--|--|--|--|--|--|--|--|--|--|--|--|--|--|--|--|--|--|--|--|--|--|--|--|--|--|--|--|--|--|--|--|--|--|--|--|--|--|--|--|--|--|--|--|--|--|--|--|--|--|--|--|--|--|--|--|--|--|--|--|--|--|--|--|--|--|--|--|--|--|--|--|--|--|--|--|--|--|--|--|--|--|--|--|--|--|--|--|--|--|--|--|--|--|--|--|--|--|--|--|--|--|--|--|--|--|--|--|--|--|--|--|--|--|--|--|--|--|--|--|--|--|--|--|--|--|--|--|--|--|--|--|--|--|--|--|--|--|--|--|--|--|--|--|--|--|--|--|--|--|--|--|--|--|--|--|--|--|--|--|--|--|--|--|--|--|--|--|--|--|--|--|--|--|--|--|--|--|--|--|--|--|--|--|--|--|--|--|--|--|--|--|--|--|--|--|--|--|--|--|--|--|--|--|--|--|--|--|--|--|--|--|--|--|--|--|--|--|--|--|--|--|--|--|--|--|--|--|--|--|--|--|--|--|--|--|--|--|--|--|--|--|--|--|--|--|--|--|--|--|--|--|--|--|--|--|--|--|--|--|--|--|--|--|--|--|--|--|--|--|--|--|--|--|--|--|--|--|--|--|--|--|--|--|--|--|--|--|--|--|--|--|--|--|--|--|--|--|--|--|--|--|--|--|--|--|--|--|--|--|--|--|--|--|--|--|--|--|--|--|--|--|--|--|--|--|--|--|--|--|--|--|--|--|--|--|--|--|--|--|--|--|--|--|--|--|--|--|--|--|--|--|--|--|--|--|--|--|--|--|--|--|--|--|--|--|--|--|--|--|--|--|--|--|--|--|--|--|--|--|--|--|--|--|--|--|--|--|--|--|--|--|--|--|--|--|--|--|--|--|--|--|--|--|--|--|--|--|--|--|--|--|--|--|--|--|--|--|--|--|--|--|--|--|--|--|--|--|--|--|--|--|--|--|--|--|--|--|--|--|--|--|--|--|--|--|--|--|--|--|--|--|--|--|--|--|--|--|--|--|--|--|--|--|--|--|--|--|--|--|--|--|--|--|--|--|--|--|--|--|--|--|--|--|--|--|--|--|--|--|--|--|--|--|--|--|--|--|--|--|--|--|--|--|--|--|--|--|--|--|--|--|--|--|--|--|--|--|--|--|--|--|--|--|--|--|--|--|--|--|--|--|--|--|--|--|--|--|--|--|--|--|--|--|--|--|--|--|--|--|--|--|--|--|--|--|--|--|--|--|--|--|--|--|--|--|--|--|--|--|--|--|--|--|--|--|--|--|--|--|--|--|--|--|--|--|--|--|--|--|--|--|--|--|--|--|--|--|--|--|--|--|--|--|--|--|--|--|--|--|--|--|--|--|--|--|--|--|--|--|--|--|--|--|--|--|--|--|--|--|--|--|--|--|--|--|--|--|--|--|--|--|--|--|--|--|--|--|--|--|--|--|--|--|--|--|--|--|--|--|--|--|--|--|--|--|--|--|--|--|--|--|--|--|--|--|--|--|--|--|--|--|--|--|--|--|--|--|--|--|--|--|--|--|--|--|--|--|--|--|--|--|--|--|--|--|--|--|--|--|--|--|--|--|--|--|--|--|--|--|--|--|--|--|--|--|--|--|--|--|--|--|--|--|--|--|--|--|--|--|--|--|--|--|--|--|--|--|--|--|--|--|--|--|--|--|--|--|--|--|--|--|--|--|--|--|--|--|--|--|--|--|--|--|--|--|--|--|--|--|--|--|--|--|--|--|--|--|--|--|--|--|--|--|--|--|--|--|--|--|--|--|--|--|--|--|--|--|--|--|--|--|--|--|--|--|--|--|--|--|--|--|--|--|--|--|--|--|--|--|--|--|--|--|--|--|--|--|--|--|--|--|--|--|--|--|--|--|--|--|--|--|--|--|--|--|--|--|--|--|--|--|--|--|--|--|--|--|--|--|--|--|--|--|--|--|--|--|--|--|--|--|--|--|--|--|--|--|--|--|--|--|--|--|--|--|--|--|--|--|--|--|--|--|--|--|--|--|--|--|--|--|--|--|--|--|--|--|--|--|--|--|--|--|--|--|--|--|--|--|--|--|--|--|--|--|--|--|--|--|--|--|--|--|--|--|--|--|--|--|--|--|--|--|--|--|--|--|--|--|--|--|--|--|--|--|--|--|--|--|--|--|--|--|--|--|--|--|--|--|--|--|--|--|--|--|--|--|--|--|--|--|--|--|--|--|--|--|--|--|--|--|--|--|--|--|--|--|--|--|--|--|--|--|--|--|--|--|--|--|--|--|--|--|--|--|--|--|--|--|--|--|--|--|--|--|--|--|--|--|--|--|--|--|--|--|--|--|--|--|--|--|--|--|--|--|--|--|--|--|--|--|--|--|--|--|--|--|--|--|--|--|--|--|--|--|--|--|--|--|--|--|--|--|--|--|--|--|--|--|--|--|--|--|--|--|--|--|--|--|--|--|--|--|--|--|--|--|--|--|--|--|--|--|--|--|--|--|--|--|--|--|--|--|--|--|--|--|--|--|--|--|--|--|--|--|--|--|--|--|--|--|--|--|--|--|--|--|--|--|--|--|--|--|--|--|--|--|--|--|--|--|--|--|--|--|--|--|--|--|--|--|--|--|--|--|--|--|--|--|--|--|--|--|--|--|--|--|--|--|--|--|--|--|--|--|--|--|--|--|--|--|--|--|--|--|--|--|--|--|--|--|--|--|--|--|--|--|--|--|--|--|--|--|--|----|

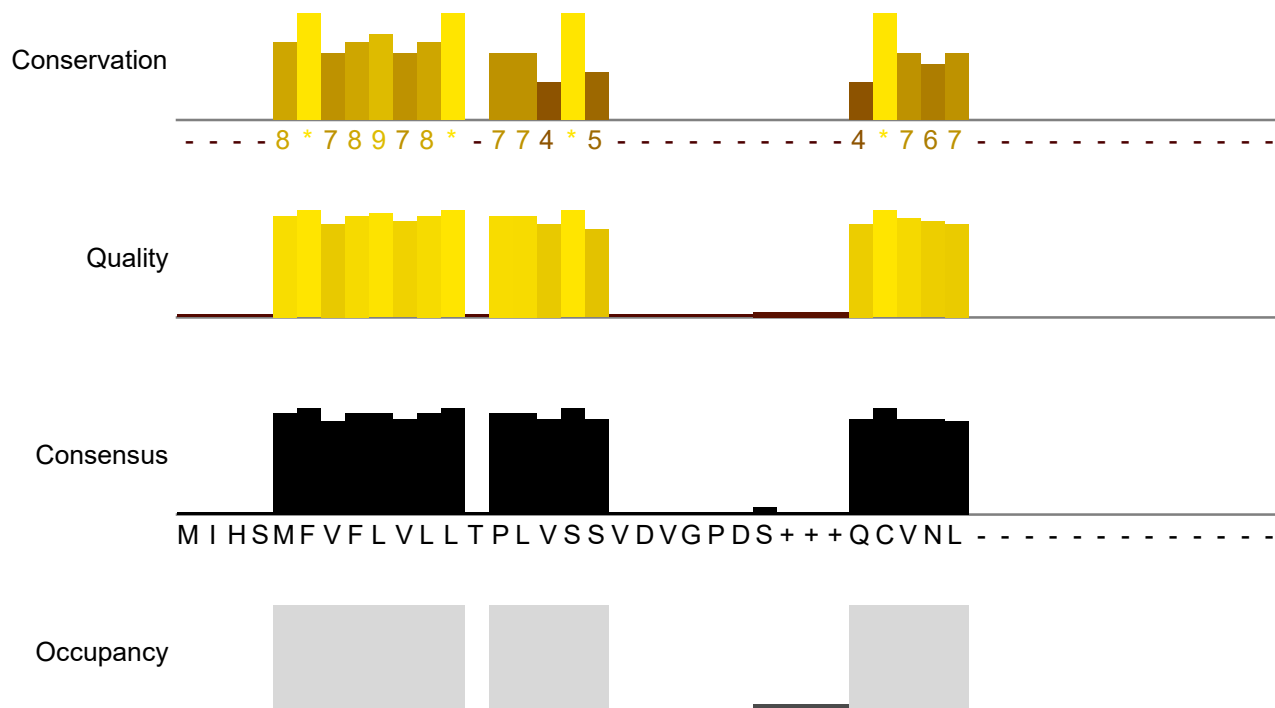





|                                           | 70- | 70- | 70- | 70- |
|-------------------------------------------|-----|-----|-----|-----|
| <b>SARS-CoV-2-Wuhan-Hu-1_spike/1-1273</b> | -   | -   | -   | -   |
| <i>SARS-CoV-Urbani_spike/1-1255</i>       | -   | -   | -   | -   |
| <i>MERS-CoV_spike/1-1353</i>              | -   | -   | -   | -   |
| <i>Alpha_B.1.1.7/1-1270</i>               | -   | -   | -   | -   |
| <i>Beta_B.1.351/1-1270</i>                | -   | -   | -   | -   |
| <i>Delta_B.1.617.2_spike/1-1271</i>       | -   | -   | -   | -   |
| <i>Gamma_P.1_spike/1-1273</i>             | -   | -   | -   | -   |
| <i>Omicron_B.1.1.529_spike/1-1273</i>     | -   | -   | -   | -   |
| <i>Omicron_BA.1_spike/1-1270</i>          | -   | -   | -   | -   |
| <i>Omicron_BA.1.1_spike/1-1270</i>        | -   | -   | -   | -   |
| <i>Omicron_BA.2_spike/1-1270</i>          | -   | -   | -   | -   |
| <i>Omicron_BA.2.12.1_spike/1-1270</i>     | -   | -   | -   | -   |
| <i>Omicron_BA.2.75_spike/1-1269</i>       | -   | -   | -   | -   |
| <i>Omicron_BA.2.75.2_spike/1-1270</i>     | -   | -   | -   | -   |
| <i>Omicron_BA.4_spike/1-1268</i>          | -   | -   | -   | -   |
| <i>Omicron_BA.4.6_spike/1-1268</i>        | -   | -   | -   | -   |
| <i>Omicron_BA.5_spike/1-1268</i>          | -   | -   | -   | -   |
| <i>Omicron_BA.5.2.6_spike/1-1268</i>      | -   | -   | -   | -   |
| <i>Omicron_BF.11_spike/1-1268</i>         | -   | -   | -   | -   |
| <i>Omicron_BF.7_spike/1-1268</i>          | -   | -   | -   | -   |
| <i>Omicron_BN.1_spike/1-1270</i>          | -   | -   | -   | -   |
| <i>Omicron_BQ.1_spike/1-1267</i>          | -   | -   | -   | -   |
| <i>Omicron_BQ.1.1_spike/1-1267</i>        | -   | -   | -   | -   |
| <i>Omicron_CH.1.1_spike/1-1270</i>        | -   | -   | -   | -   |
| <i>Omicron_XBB_spike/1-1269</i>           | -   | -   | -   | -   |
| <i>Omicron_XBB.1.5_spike/1-1269</i>       | -   | -   | -   | -   |

## Conservation

## Quality

## Consensus

Occupancy



|                                           | 70-       | 70V                       | 77-     | 84L                 | 91Y               |       |       |
|-------------------------------------------|-----------|---------------------------|---------|---------------------|-------------------|-------|-------|
| <b>SARS-CoV-2-Wuhan-Hu-1_spike/1-1273</b> | - - - - - | V S G T N G T             | K R     | F D N               | P V L P F N D G V | - - - | Y F A |
| <i>SARS-CoV-Urbani_spike/1-1255</i>       | - - - - - | - - - - -                 | H T     | F G N               | P V I P F K D G I | - - - | Y F A |
| <i>MERS-CoV_spike/1-1353</i>              | - - - - - | A T G T T P Q K L F V A N | - Y S Q | - D V K Q F A N G F | - - -             | V V R |       |
| <i>Alpha_B.1.1.7/1-1270</i>               | - - - - - | S G T N G T               | K R     | F D N               | P V L P F N D G V | - - - | Y F A |
| <i>Beta_B.1.351/1-1270</i>                | - - - - - | V S G T N G T             | K R     | F A N               | P V L P F N D G V | - - - | Y F A |
| <i>Delta_B.1.617.2_spike/1-1271</i>       | - - - - - | V S G T N G T             | T R     | F D N               | P V L P F N D G V | - - - | Y F A |
| <i>Gamma_P.1_spike/1-1273</i>             | - - - - - | V S G T N G T             | K R     | F D N               | P V L P F N D G V | - - - | Y F A |
| <i>Omicron_B.1.1.529_spike/1-1273</i>     | - - - - - | V S G T N G T             | K R     | F D N               | P V L P F N D G V | - - - | Y F A |
| <i>Omicron_BA.1_spike/1-1270</i>          | - - - - - | S G T N G T               | K R     | F D N               | P V L P F N D G V | - - - | Y F A |
| <i>Omicron_BA.1.1_spike/1-1270</i>        | - - - - - | S G T N G T               | K R     | F D N               | P V L P F N D G V | - - - | Y F A |
| <i>Omicron_BA.2_spike/1-1270</i>          | - - - - - | V S G T N G T             | K R     | F D N               | P V L P F N D G V | - - - | Y F A |
| <i>Omicron_BA.2.12.1_spike/1-1270</i>     | - - - - - | V S G T N G T             | K R     | F D N               | P V L P F N D G V | - - - | Y F A |
| <i>Omicron_BA.2.75_spike/1-1269</i>       | - - - - - | V S G T N G T             | K R     | F D N               | P V L P F N D G V | - - - | Y F A |
| <i>Omicron_BA.2.75.2_spike/1-1270</i>     | - - - - - | V S G T N G T             | K R     | F D N               | P V L P F N D G V | - - - | Y F A |
| <i>Omicron_BA.4_spike/1-1268</i>          | - - - - - | S G T N G T               | K R     | F D N               | P V L P F N D G V | - - - | Y F A |
| <i>Omicron_BA.4.6_spike/1-1268</i>        | - - - - - | S G T N G T               | K R     | F D N               | P V L P F N D G V | - - - | Y F A |
| <i>Omicron_BA.5_spike/1-1268</i>          | - - - - - | S G T N G T               | K R     | F D N               | P V L P F N D G V | - - - | Y F A |
| <i>Omicron_BA.5.2.6_spike/1-1268</i>      | - - - - - | S G T N G T               | K R     | F D N               | P V L P F N D G V | - - - | Y F A |
| <i>Omicron_BF.11_spike/1-1268</i>         | - - - - - | S G T N G T               | K R     | F D N               | P V L P F N D G V | - - - | Y F A |
| <i>Omicron_BF.7_spike/1-1268</i>          | - - - - - | S G T N G T               | K R     | F D N               | P V L P F N D G V | - - - | Y F A |
| <i>Omicron_BN.1_spike/1-1270</i>          | - - - - - | V S G T N G T             | K R     | F D N               | P V L P F N D G V | - - - | Y F A |
| <i>Omicron_BQ.1_spike/1-1267</i>          | - - - - - | S G T N G T               | K R     | F D N               | P V L P F N D G V | - - - | Y F A |
| <i>Omicron_BQ.1.1_spike/1-1267</i>        | - - - - - | S G T N G T               | K R     | F D N               | P V L P F N D G V | - - - | Y F A |
| <i>Omicron_CH.1.1_spike/1-1270</i>        | - - - - - | V S G T N G T             | K R     | F D N               | P V L P F N D G V | - - - | Y F A |
| <i>Omicron_XBB_spike/1-1269</i>           | - - - - - | V S G T N G T             | K R     | F D N               | P A L P F N D G V | - - - | Y F A |
| <i>Omicron_XBB.1.5_spike/1-1269</i>       | - - - - - | V S G T N G T             | K R     | F D N               | P A L P F N D G V | - - - | Y F A |

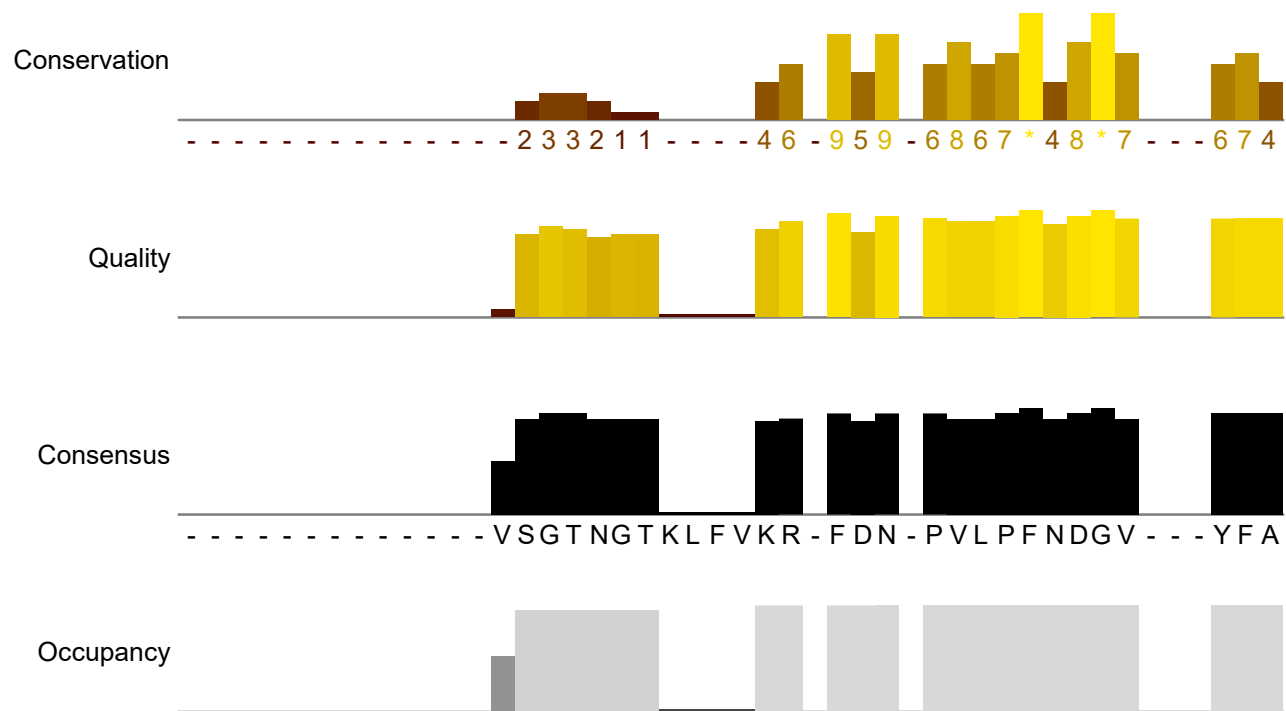

|                                           |           | 96-   | 96- | 97-       | 106F                   |
|-------------------------------------------|-----------|-------|-----|-----------|------------------------|
| <b>SARS-CoV-2-Wuhan-Hu-1_spike/1-1273</b> | <b>ST</b> | -     | -   | E         | KSNIIIRGWIFGTTLD SKT   |
| <i>SARS-CoV-Urbani_spike/1-1255</i>       | <b>AT</b> | -     | -   | E         | KSNVVVRGWVFGSTMNNKS    |
| <i>MERS-CoV_spike/1-1353</i>              | I         | GAAAN | -   | STGTVIISP | SATIRKIYP AFMLGSSVGNFS |
| <i>Alpha_B.1.1.7/1-1270</i>               | <b>ST</b> | -     | -   | E         | KSNIIIRGWIFGTTLD SKT   |
| <i>Beta_B.1.351/1-1270</i>                | <b>ST</b> | -     | -   | E         | KSNIIIRGWIFGTTLD SKT   |
| <i>Delta_B.1.617.2_spike/1-1271</i>       | <b>ST</b> | -     | -   | E         | KSNIIIRGWIFGTTLD SKT   |
| <i>Gamma_P.1_spike/1-1273</i>             | <b>ST</b> | -     | -   | E         | KSNIIIRGWIFGTTLD SKT   |
| <i>Omicron_B.1.1.529_spike/1-1273</i>     | <b>ST</b> | -     | -   | E         | KSNIIIRGWIFGTTLD SKT   |
| <i>Omicron_BA.1_spike/1-1270</i>          | <b>SI</b> | -     | -   | E         | KSNIIIRGWIFGTTLD SKT   |
| <i>Omicron_BA.1.1_spike/1-1270</i>        | <b>SI</b> | -     | -   | E         | KSNIIIRGWIFGTTLD SKT   |
| <i>Omicron_BA.2_spike/1-1270</i>          | <b>ST</b> | -     | -   | E         | KSNIIIRGWIFGTTLD SKT   |
| <i>Omicron_BA.2.12.1_spike/1-1270</i>     | <b>ST</b> | -     | -   | E         | KSNIIIRGWIFGTTLD SKT   |
| <i>Omicron_BA.2.75_spike/1-1269</i>       | <b>ST</b> | -     | -   | E         | KSNIIIRGWIFGTTLD SKT   |
| <i>Omicron_BA.2.75.2_spike/1-1270</i>     | <b>ST</b> | -     | -   | E         | KSNIIIRGWIFGTTLD SKT   |
| <i>Omicron_BA.4_spike/1-1268</i>          | <b>ST</b> | -     | -   | E         | KSNIIIRGWIFGTTLD SKT   |
| <i>Omicron_BA.4.6_spike/1-1268</i>        | <b>ST</b> | -     | -   | E         | KSNIIIRGWIFGTTLD SKT   |
| <i>Omicron_BA.5_spike/1-1268</i>          | <b>ST</b> | -     | -   | E         | KSNIIIRGWIFGTTLD SKT   |
| <i>Omicron_BA.5.2.6_spike/1-1268</i>      | <b>ST</b> | -     | -   | E         | KSNIIIRGWIFGTTLD SKT   |
| <i>Omicron_BF.11_spike/1-1268</i>         | <b>ST</b> | -     | -   | E         | KSNIIIRGWIFGTTLD SKT   |
| <i>Omicron_BF.7_spike/1-1268</i>          | <b>ST</b> | -     | -   | E         | KSNIIIRGWIFGTTLD SKT   |
| <i>Omicron_BN.1_spike/1-1270</i>          | <b>ST</b> | -     | -   | E         | KSNIIIRGWIFGTTLD SKT   |
| <i>Omicron_BQ.1_spike/1-1267</i>          | <b>ST</b> | -     | -   | E         | KSNIIIRGWIFGTTLD SKT   |
| <i>Omicron_BQ.1.1_spike/1-1267</i>        | <b>ST</b> | -     | -   | E         | KSNIIIRGWIFGTTLD SKT   |
| <i>Omicron_CH.1.1_spike/1-1270</i>        | <b>ST</b> | -     | -   | E         | KSNIIIRGWIFGTTLD SKT   |
| <i>Omicron_XBB_spike/1-1269</i>           | <b>ST</b> | -     | -   | E         | KSNIIIRGWIFGTTLD SKT   |
| <i>Omicron_XBB.1.5_spike/1-1269</i>       | <b>ST</b> | -     | -   | E         | KSNIIIRGWIFGTTLD SKT   |

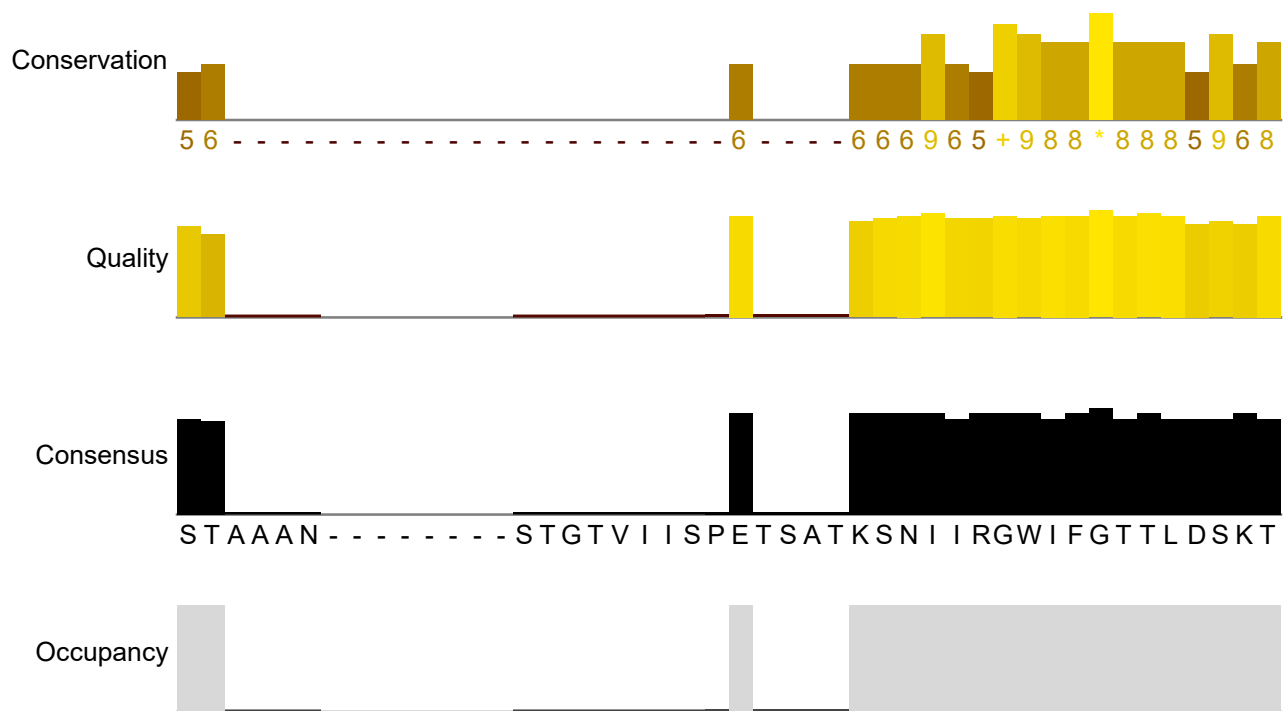

|                                           | 116S        | 117L   | 123- | 127V      | 134-      |
|-------------------------------------------|-------------|--------|------|-----------|-----------|
| <b>SARS-CoV-2-Wuhan-Hu-1_spike/1-1273</b> | QS          | LLIVNN | A    | TNVVIKV   | CEF       |
| <i>SARS-CoV-Urbani_spike/1-1255</i>       | QS          | VIIINN | S    | TNVVIRA   | CNF       |
| <i>MERS-CoV_spike/1-1353</i>              | DGKMGRFFNHT | LVLLPD | G    | CGTLLRAFY | CILEPRSGN |
| <i>Alpha_B.1.1.7/1-1270</i>               | QS          | LLIVNN | A    | TNVVIKV   | CEF       |
| <i>Beta_B.1.351/1-1270</i>                | QS          | LLIVNN | A    | TNVVIKV   | CEF       |
| <i>Delta_B.1.617.2_spike/1-1271</i>       | QS          | LLIVNN | A    | TNVVIKV   | CEF       |
| <i>Gamma_P.1_spike/1-1273</i>             | QS          | LLIVNN | A    | TNVVIKV   | CEF       |
| <i>Omicron_B.1.1.529_spike/1-1273</i>     | QS          | LLIVNN | A    | TNVVIKV   | CEF       |
| <i>Omicron_BA.1_spike/1-1270</i>          | QS          | LLIVNN | A    | TNVVIKV   | CEF       |
| <i>Omicron_BA.1.1_spike/1-1270</i>        | QS          | LLIVNN | A    | TNVVIKV   | CEF       |
| <i>Omicron_BA.2_spike/1-1270</i>          | QS          | LLIVNN | A    | TNVVIKV   | CEF       |
| <i>Omicron_BA.2.12.1_spike/1-1270</i>     | QS          | LLIVNN | A    | TNVVIKV   | CEF       |
| <i>Omicron_BA.2.75_spike/1-1269</i>       | QS          | LLIVNN | A    | TNVVIKV   | CEF       |
| <i>Omicron_BA.2.75.2_spike/1-1270</i>     | QS          | LLIVNN | A    | TNVVIKV   | CEF       |
| <i>Omicron_BA.4_spike/1-1268</i>          | QS          | LLIVNN | A    | TNVVIKV   | CEF       |
| <i>Omicron_BA.4.6_spike/1-1268</i>        | QS          | LLIVNN | A    | TNVVIKV   | CEF       |
| <i>Omicron_BA.5_spike/1-1268</i>          | QS          | LLIVNN | A    | TNVVIKV   | CEF       |
| <i>Omicron_BA.5.2.6_spike/1-1268</i>      | QS          | LLIVNN | A    | TNVVIKV   | CEF       |
| <i>Omicron_BF.11_spike/1-1268</i>         | QS          | LLIVNN | A    | TNVVIKV   | CEF       |
| <i>Omicron_BF.7_spike/1-1268</i>          | QS          | LLIVNN | A    | TNVVIKV   | CEF       |
| <i>Omicron_BN.1_spike/1-1270</i>          | QS          | LLIVNN | A    | TNVVIKV   | CEF       |
| <i>Omicron_BQ.1_spike/1-1267</i>          | QS          | LLIVNN | A    | TNVVIKV   | CEF       |
| <i>Omicron_BQ.1.1_spike/1-1267</i>        | QS          | LLIVNN | A    | TNVVIKV   | CEF       |
| <i>Omicron_CH.1.1_spike/1-1270</i>        | QS          | LLIVNN | A    | TNVVIKV   | CEF       |
| <i>Omicron_XBB_spike/1-1269</i>           | QS          | LLIVNN | A    | TNVVIKV   | CEF       |
| <i>Omicron_XBB.1.5_spike/1-1269</i>       | QS          | LLIVNN | A    | TNVVIKV   | CEF       |

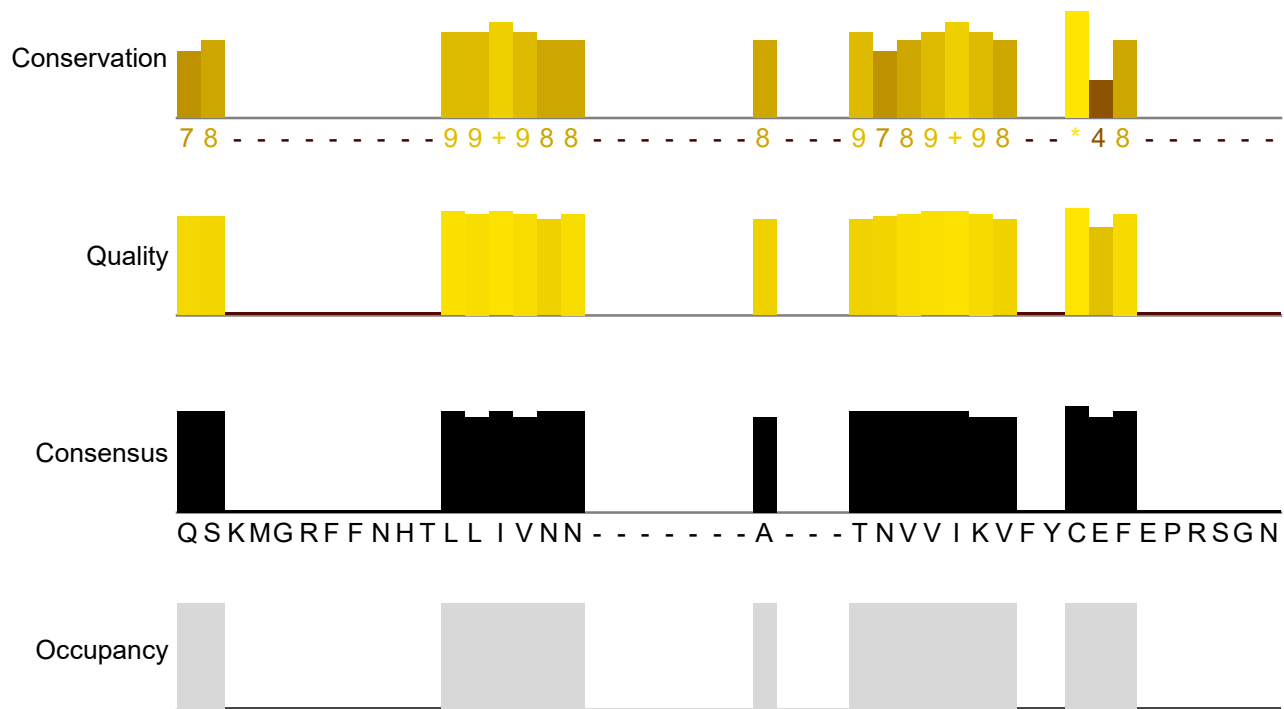



|                                           |             | 134-      | 134-      | 142G                | 149N                 |
|-------------------------------------------|-------------|-----------|-----------|---------------------|----------------------|
| <b>SARS-CoV-2-Wuhan-Hu-1_spike/1-1273</b> | - - - - -   | - - - - - | - - - - - | QFCNDPFLGVYYHKN     | - - - NKSWMESEFRV    |
| <i>SARS-CoV-Urbani_spike/1-1255</i>       | - - - - -   | - - - - - | - - - - - | ELCDNPFFAVSKPMG     | - - - T - - - QTHMI  |
| <i>MERS-CoV_spike/1-1353</i>              | HCP - - - - | - - - - - | AGNSYTSF  | ATYHTPATDCSDGNY     | - - - NRNASLNSFKE    |
| <i>Alpha_B.1.1.7/1-1270</i>               | - - - - -   | - - - - - | - - - - - | QFCNDPFLGVY-HKN     | - - - NKSWMESEFRV    |
| <i>Beta_B.1.351/1-1270</i>                | - - - - -   | - - - - - | - - - - - | QFCNDPFLGVYYHKN     | - - - NKSWMESEFRV    |
| <i>Delta_B.1.617.2_spike/1-1271</i>       | - - - - -   | - - - - - | - - - - - | QFCNDPFLDVYYHKN     | - - - NKSWMES - - GV |
| <i>Gamma_P.1_spike/1-1273</i>             | - - - - -   | - - - - - | - - - - - | QFCNYPFLGVYYHKN     | - - - NKSWMESEFRV    |
| <i>Omicron_B.1.1.529_spike/1-1273</i>     | - - - - -   | - - - - - | - - - - - | QFCNDPFLGVYYHKN     | - - - NKSWMESEFRV    |
| <i>Omicron_BA.1_spike/1-1270</i>          | - - - - -   | - - - - - | - - - - - | QFCNDPFLD - - - HKN | - - - NKSWMESEFRV    |
| <i>Omicron_BA.1.1_spike/1-1270</i>        | - - - - -   | - - - - - | - - - - - | QFCNDPFLD - - - HKN | - - - NKSWMESEFRV    |
| <i>Omicron_BA.2_spike/1-1270</i>          | - - - - -   | - - - - - | - - - - - | QFCNDPFLDVYYHKN     | - - - NKSWMESEFRV    |
| <i>Omicron_BA.2.12.1_spike/1-1270</i>     | - - - - -   | - - - - - | - - - - - | QFCNDPFLDVYYHKN     | - - - NKSWMESEFRV    |
| <i>Omicron_BA.2.75_spike/1-1269</i>       | - - - - -   | - - - - - | - - - - - | QFCNDPFLGVYYHKN     | - - - NKSWMESEFRV    |
| <i>Omicron_BA.2.75.2_spike/1-1270</i>     | - - - - -   | - - - - - | - - - - - | QFCNDPFLDVYYHEN     | - - - NKSRMESE LRV   |
| <i>Omicron_BA.4_spike/1-1268</i>          | - - - - -   | - - - - - | - - - - - | QFCNDPFLDVYYHKN     | - - - NKSWMESEFRV    |
| <i>Omicron_BA.4.6_spike/1-1268</i>        | - - - - -   | - - - - - | - - - - - | QFCNDPFLDVYYHKN     | - - - NKSWMESEFRV    |
| <i>Omicron_BA.5_spike/1-1268</i>          | - - - - -   | - - - - - | - - - - - | QFCNDPFLDVYYHKN     | - - - NKSWMESEFRV    |
| <i>Omicron_BA.5.2.6_spike/1-1268</i>      | - - - - -   | - - - - - | - - - - - | QFCNDPFLDVYYHKN     | - - - NKSWMESEFRV    |
| <i>Omicron_BF.11_spike/1-1268</i>         | - - - - -   | - - - - - | - - - - - | QFCNDPFLDVYYHKN     | - - - NKSWMESEFRV    |
| <i>Omicron_BF.7_spike/1-1268</i>          | - - - - -   | - - - - - | - - - - - | QFCNDPFLDVYYHKN     | - - - NKSWMESEFRV    |
| <i>Omicron_BN.1_spike/1-1270</i>          | - - - - -   | - - - - - | - - - - - | QFCNDPFLDVYYHEN     | - - - NKSRMESE LRV   |
| <i>Omicron_BQ.1_spike/1-1267</i>          | - - - - -   | - - - - - | - - - - - | QFCNDPFLDVY-HKN     | - - - NKSWMESEFRV    |
| <i>Omicron_BQ.1.1_spike/1-1267</i>        | - - - - -   | - - - - - | - - - - - | QFCNDPFLDVY-HKN     | - - - NKSWMESEFRV    |
| <i>Omicron_CH.1.1_spike/1-1270</i>        | - - - - -   | - - - - - | - - - - - | QFCNDPFLDVYYHEN     | - - - NKSRMESE LRV   |
| <i>Omicron_XBB_spike/1-1269</i>           | - - - - -   | - - - - - | - - - - - | QFCNDPFLDVYQ-KN     | - - - NKSWMESEFRV    |
| <i>Omicron_XBB.1.5_spike/1-1269</i>       | - - - - -   | - - - - - | - - - - - | QFCNDPFLDVYQ-KN     | - - - NKSWMESEFRV    |

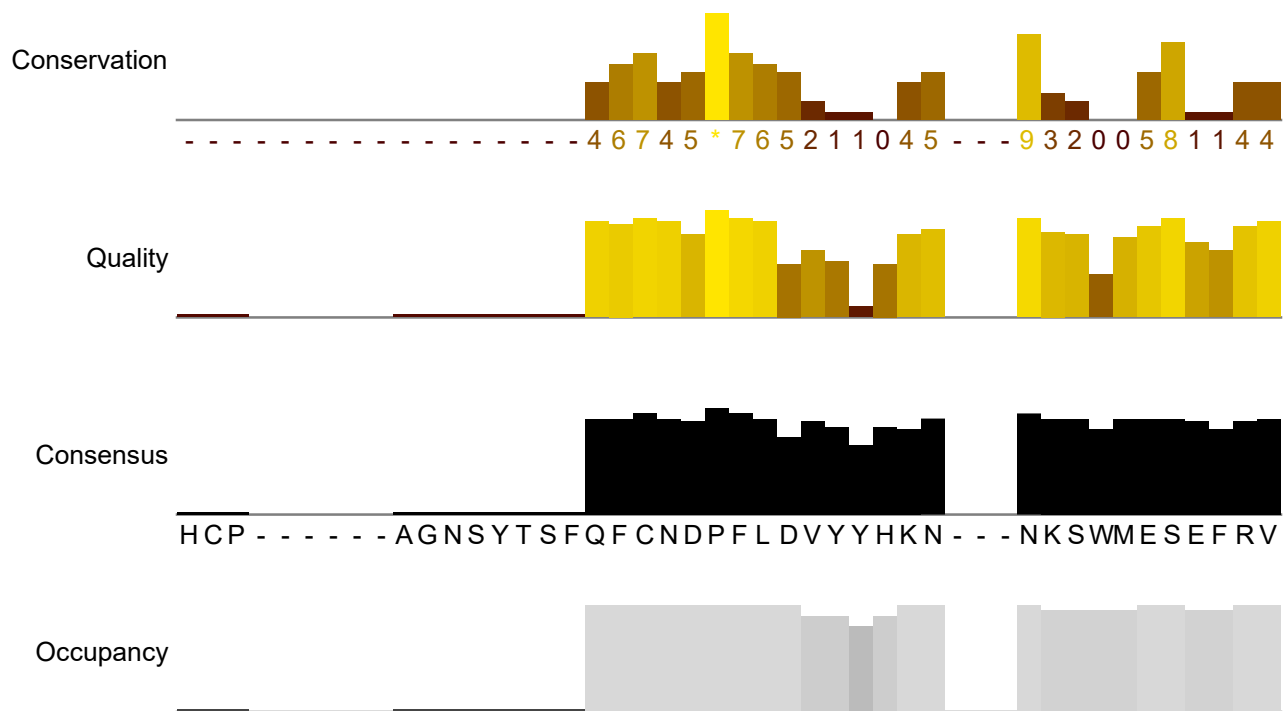



|  |  |  |  |  |  | 209P |  |  |  |  |  |  |  |  |  |  |  |  |  |  |  |  |  |  |  |  |  |  |  |  |  |  |  |  |  |  |  |  |  |  |  |  |  |  |  |  |  |  |  |  |  |  |  |  |  |  |  |  |  |  |  |  |  |  |  |  |  |  |  |  |  |  |  |  |  |  |  |  |  |  |  |  |  |  |  |  |  |  |  |  |  |  |  |  |  |  |  |  |  |  |  |  |  |  |  |  |  |  |  |  |  |  |  |  |  |  |  |  |  |  |  |  |  |  |  |  |  |  |  |  |  |  |  |  |  |  |  |  |  |  |  |  |  |  |  |  |  |  |  |  |  |  |  |  |  |  |  |  |  |  |  |  |  |  |  |  |  |  |  |  |  |  |  |  |  |  |  |  |  |  |  |  |  |  |  |  |  |  |  |  |  |  |  |  |  |  |  |  |  |  |  |  |  |  |  |  |  |  |  |  |  |  |  |  |  |  |  |  |  |  |  |  |  |  |  |  |  |  |  |  |  |  |  |  |  |  |  |  |  |  |  |  |  |  |  |  |  |  |  |  |  |  |  |  |  |  |  |  |  |  |  |  |  |  |  |  |  |  |  |  |  |  |  |  |  |  |  |  |  |  |  |  |  |  |  |  |  |  |  |  |  |  |  |  |  |  |  |  |  |  |  |  |  |  |  |  |  |  |  |  |  |  |  |  |  |  |  |  |  |  |  |  |  |  |  |  |  |  |  |  |  |  |  |  |  |  |  |  |  |  |  |  |  |  |  |  |  |  |  |  |  |  |  |  |  |  |  |  |  |  |  |  |  |  |  |  |  |  |  |  |  |  |  |  |  |  |  |  |  |  |  |  |  |  |  |  |  |  |  |  |  |  |  |  |  |  |  |  |  |  |  |  |  |  |  |  |  |  |  |  |  |  |  |  |  |  |  |  |  |  |  |  |  |  |  |  |  |  |  |  |  |  |  |  |  |  |  |  |  |  |  |  |  |  |  |  |  |  |  |  |  |  |  |  |  |  |  |  |  |  |  |  |  |  |  |  |  |  |  |  |  |  |  |  |  |  |  |  |  |  |  |  |  |  |  |  |  |  |  |  |  |  |  |  |  |  |  |  |  |  |  |  |  |  |  |  |  |  |  |  |  |  |  |  |  |  |  |  |  |  |  |  |  |  |  |  |  |  |  |  |  |  |  |  |  |  |  |  |  |  |  |  |  |  |  |  |  |  |  |  |  |  |  |  |  |  |  |  |  |  |  |  |  |  |  |  |  |  |  |  |  |  |  |  |  |  |  |  |  |  |  |  |  |  |  |  |  |  |  |  |  |  |  |  |  |  |  |  |  |  |  |  |  |  |  |  |  |  |  |  |  |  |  |  |  |  |  |  |  |  |  |  |  |  |  |  |  |  |  |  |  |  |  |  |  |  |  |  |  |  |  |  |  |  |  |  |  |  |  |  |  |  |  |  |  |  |  |  |  |  |  |  |  |  |  |  |  |  |  |  |  |  |  |  |  |  |  |  |  |  |  |  |  |  |  |  |  |  |  |  |  |  |  |  |  |  |  |  |  |  |  |  |  |  |  |  |  |  |  |  |  |  |  |  |  |  |  |  |  |  |  |  |  |  |  |  |  |  |  |  |  |  |  |  |  |  |  |  |  |  |  |  |  |  |  |  |  |  |  |  |  |  |  |  |  |  |  |  |  |  |  |  |  |  |  |  |  |  |  |  |  |  |  |  |  |  |  |  |  |  |  |  |  |  |  |  |  |  |  |  |  |  |  |  |  |  |  |  |  |  |  |  |  |  |  |  |  |  |  |  |  |  |  |  |  |  |  |  |  |  |  |  |  |  |  |  |  |  |  |  |  |  |  |  |  |  |  |  |  |  |  |  |  |  |  |  |  |  |  |  |  |  |  |  |  |  |  |  |  |  |  |  |  |  |  |  |  |  |  |  |  |  |  |  |  |  |  |  |  |  |  |  |  |  |  |  |  |  |  |  |  |  |  |  |  |  |  |  |  |  |  |  |  |  |  |  |  |  |  |  |  |  |  |  |  |  |  |  |  |  |  |  |  |  |  |  |  |  |  |  |  |  |  |  |  |  |  |  |  |  |  |  |  |  |  |  |  |  |  |  |  |  |  |  |  |  |  |  |  |  |  |  |  |  |  |  |  |  |  |  |  |  |  |  |  |  |  |  |  |  |  |  |  |  |  |  |  |  |  |  |  |  |  |  |  |  |  |  |  |  |  |  |  |  |  |  |  |  |  |  |  |  |  |  |  |  |  |  |  |  |  |  |  |  |  |  |  |  |  |  |  |  |  |  |  |  |  |  |  |  |  |  |  |  |  |  |  |  |  |  |  |  |  |  |  |  |  |  |  |  |  |  |  |  |  |  |  |  |  |  |  |  |  |  |  |  |  |  |  |  |  |  |  |  |  |  |  |  |  |  |  |  |  |  |  |  |  |  |  |  |  |  |  |  |  |  |  |  |  |  |  |  |  |  |  |  |  |  |  |  |  |  |  |  |  |  |  |  |  |  |  |  |  |  |  |  |  |  |  |  |  |  |  |  |  |  |  |  |  |  |  |  |  |  |  |  |  |  |  |  |  |  |  |  |  |  |  |  |  |  |  |  |  |  |  |  |  |  |  |  |  |  |  |  |  |  |  |  |  |  |  |  |  |  |  |  |  |  |  |  |  |  |  |  |  |  |  |  |  |  |  |  |  |  |  |  |  |  |  |  |  |  |  |  |  |  |  |  |  |  |  |  |  |  |  |  |  |  |  |  |  |  |  |  |  |  |  |  |  |  |  |  |  |  |  |  |  |  |  |  |  |  |  |  |  |  |  |  |  |  |  |  |  |  |  |  |  |  |  |  |  |  |  |  |  |  |  |  |  |  |  |  |  |  |  |  |  |  |  |  |  |  |  |  |  |  |  |  |  |  |  |  |  |  |  |  |  |  |  |  |  |  |  |  |  |  |  |  |  |  |  |  |  |  |  |  |  |  |  |  |  |  |  |  |  |  |  |  |  |  |  |  |  |  |  |  |  |  |  |  |  |  |  |  |
|--|--|--|--|--|--|------|--|--|--|--|--|--|--|--|--|--|--|--|--|--|--|--|--|--|--|--|--|--|--|--|--|--|--|--|--|--|--|--|--|--|--|--|--|--|--|--|--|--|--|--|--|--|--|--|--|--|--|--|--|--|--|--|--|--|--|--|--|--|--|--|--|--|--|--|--|--|--|--|--|--|--|--|--|--|--|--|--|--|--|--|--|--|--|--|--|--|--|--|--|--|--|--|--|--|--|--|--|--|--|--|--|--|--|--|--|--|--|--|--|--|--|--|--|--|--|--|--|--|--|--|--|--|--|--|--|--|--|--|--|--|--|--|--|--|--|--|--|--|--|--|--|--|--|--|--|--|--|--|--|--|--|--|--|--|--|--|--|--|--|--|--|--|--|--|--|--|--|--|--|--|--|--|--|--|--|--|--|--|--|--|--|--|--|--|--|--|--|--|--|--|--|--|--|--|--|--|--|--|--|--|--|--|--|--|--|--|--|--|--|--|--|--|--|--|--|--|--|--|--|--|--|--|--|--|--|--|--|--|--|--|--|--|--|--|--|--|--|--|--|--|--|--|--|--|--|--|--|--|--|--|--|--|--|--|--|--|--|--|--|--|--|--|--|--|--|--|--|--|--|--|--|--|--|--|--|--|--|--|--|--|--|--|--|--|--|--|--|--|--|--|--|--|--|--|--|--|--|--|--|--|--|--|--|--|--|--|--|--|--|--|--|--|--|--|--|--|--|--|--|--|--|--|--|--|--|--|--|--|--|--|--|--|--|--|--|--|--|--|--|--|--|--|--|--|--|--|--|--|--|--|--|--|--|--|--|--|--|--|--|--|--|--|--|--|--|--|--|--|--|--|--|--|--|--|--|--|--|--|--|--|--|--|--|--|--|--|--|--|--|--|--|--|--|--|--|--|--|--|--|--|--|--|--|--|--|--|--|--|--|--|--|--|--|--|--|--|--|--|--|--|--|--|--|--|--|--|--|--|--|--|--|--|--|--|--|--|--|--|--|--|--|--|--|--|--|--|--|--|--|--|--|--|--|--|--|--|--|--|--|--|--|--|--|--|--|--|--|--|--|--|--|--|--|--|--|--|--|--|--|--|--|--|--|--|--|--|--|--|--|--|--|--|--|--|--|--|--|--|--|--|--|--|--|--|--|--|--|--|--|--|--|--|--|--|--|--|--|--|--|--|--|--|--|--|--|--|--|--|--|--|--|--|--|--|--|--|--|--|--|--|--|--|--|--|--|--|--|--|--|--|--|--|--|--|--|--|--|--|--|--|--|--|--|--|--|--|--|--|--|--|--|--|--|--|--|--|--|--|--|--|--|--|--|--|--|--|--|--|--|--|--|--|--|--|--|--|--|--|--|--|--|--|--|--|--|--|--|--|--|--|--|--|--|--|--|--|--|--|--|--|--|--|--|--|--|--|--|--|--|--|--|--|--|--|--|--|--|--|--|--|--|--|--|--|--|--|--|--|--|--|--|--|--|--|--|--|--|--|--|--|--|--|--|--|--|--|--|--|--|--|--|--|--|--|--|--|--|--|--|--|--|--|--|--|--|--|--|--|--|--|--|--|--|--|--|--|--|--|--|--|--|--|--|--|--|--|--|--|--|--|--|--|--|--|--|--|--|--|--|--|--|--|--|--|--|--|--|--|--|--|--|--|--|--|--|--|--|--|--|--|--|--|--|--|--|--|--|--|--|--|--|--|--|--|--|--|--|--|--|--|--|--|--|--|--|--|--|--|--|--|--|--|--|--|--|--|--|--|--|--|--|--|--|--|--|--|--|--|--|--|--|--|--|--|--|--|--|--|--|--|--|--|--|--|--|--|--|--|--|--|--|--|--|--|--|--|--|--|--|--|--|--|--|--|--|--|--|--|--|--|--|--|--|--|--|--|--|--|--|--|--|--|--|--|--|--|--|--|--|--|--|--|--|--|--|--|--|--|--|--|--|--|--|--|--|--|--|--|--|--|--|--|--|--|--|--|--|--|--|--|--|--|--|--|--|--|--|--|--|--|--|--|--|--|--|--|--|--|--|--|--|--|--|--|--|--|--|--|--|--|--|--|--|--|--|--|--|--|--|--|--|--|--|--|--|--|--|--|--|--|--|--|--|--|--|--|--|--|--|--|--|--|--|--|--|--|--|--|--|--|--|--|--|--|--|--|--|--|--|--|--|--|--|--|--|--|--|--|--|--|--|--|--|--|--|--|--|--|--|--|--|--|--|--|--|--|--|--|--|--|--|--|--|--|--|--|--|--|--|--|--|--|--|--|--|--|--|--|--|--|--|--|--|--|--|--|--|--|--|--|--|--|--|--|--|--|--|--|--|--|--|--|--|--|--|--|--|--|--|--|--|--|--|--|--|--|--|--|--|--|--|--|--|--|--|--|--|--|--|--|--|--|--|--|--|--|--|--|--|--|--|--|--|--|--|--|--|--|--|--|--|--|--|--|--|--|--|--|--|--|--|--|--|--|--|--|--|--|--|--|--|--|--|--|--|--|--|--|--|--|--|--|--|--|--|--|--|--|--|--|--|--|--|--|--|--|--|--|--|--|--|--|--|--|--|--|--|--|--|--|--|--|--|--|--|--|--|--|--|--|--|--|--|--|--|--|--|--|--|--|--|--|--|--|--|--|--|--|--|--|--|--|--|--|--|--|--|--|--|--|--|--|--|--|--|--|--|--|--|--|--|--|--|--|--|--|--|--|--|--|--|--|--|--|--|--|--|--|--|--|--|--|--|--|--|--|--|--|--|--|--|--|--|--|--|--|--|--|--|--|--|--|--|--|--|--|--|--|--|--|--|--|--|--|--|--|--|--|--|--|--|--|--|--|--|--|--|--|--|--|--|--|--|--|--|--|--|--|--|--|--|--|--|--|--|--|--|--|--|--|--|--|--|--|--|--|--|--|--|--|--|--|--|--|--|--|--|--|--|--|--|--|--|--|--|--|--|--|--|--|--|--|--|--|--|--|--|--|--|--|--|--|--|--|--|--|--|--|--|--|--|--|--|--|--|--|--|--|--|--|--|--|--|--|--|--|--|--|--|--|--|--|--|--|
|--|--|--|--|--|--|------|--|--|--|--|--|--|--|--|--|--|--|--|--|--|--|--|--|--|--|--|--|--|--|--|--|--|--|--|--|--|--|--|--|--|--|--|--|--|--|--|--|--|--|--|--|--|--|--|--|--|--|--|--|--|--|--|--|--|--|--|--|--|--|--|--|--|--|--|--|--|--|--|--|--|--|--|--|--|--|--|--|--|--|--|--|--|--|--|--|--|--|--|--|--|--|--|--|--|--|--|--|--|--|--|--|--|--|--|--|--|--|--|--|--|--|--|--|--|--|--|--|--|--|--|--|--|--|--|--|--|--|--|--|--|--|--|--|--|--|--|--|--|--|--|--|--|--|--|--|--|--|--|--|--|--|--|--|--|--|--|--|--|--|--|--|--|--|--|--|--|--|--|--|--|--|--|--|--|--|--|--|--|--|--|--|--|--|--|--|--|--|--|--|--|--|--|--|--|--|--|--|--|--|--|--|--|--|--|--|--|--|--|--|--|--|--|--|--|--|--|--|--|--|--|--|--|--|--|--|--|--|--|--|--|--|--|--|--|--|--|--|--|--|--|--|--|--|--|--|--|--|--|--|--|--|--|--|--|--|--|--|--|--|--|--|--|--|--|--|--|--|--|--|--|--|--|--|--|--|--|--|--|--|--|--|--|--|--|--|--|--|--|--|--|--|--|--|--|--|--|--|--|--|--|--|--|--|--|--|--|--|--|--|--|--|--|--|--|--|--|--|--|--|--|--|--|--|--|--|--|--|--|--|--|--|--|--|--|--|--|--|--|--|--|--|--|--|--|--|--|--|--|--|--|--|--|--|--|--|--|--|--|--|--|--|--|--|--|--|--|--|--|--|--|--|--|--|--|--|--|--|--|--|--|--|--|--|--|--|--|--|--|--|--|--|--|--|--|--|--|--|--|--|--|--|--|--|--|--|--|--|--|--|--|--|--|--|--|--|--|--|--|--|--|--|--|--|--|--|--|--|--|--|--|--|--|--|--|--|--|--|--|--|--|--|--|--|--|--|--|--|--|--|--|--|--|--|--|--|--|--|--|--|--|--|--|--|--|--|--|--|--|--|--|--|--|--|--|--|--|--|--|--|--|--|--|--|--|--|--|--|--|--|--|--|--|--|--|--|--|--|--|--|--|--|--|--|--|--|--|--|--|--|--|--|--|--|--|--|--|--|--|--|--|--|--|--|--|--|--|--|--|--|--|--|--|--|--|--|--|--|--|--|--|--|--|--|--|--|--|--|--|--|--|--|--|--|--|--|--|--|--|--|--|--|--|--|--|--|--|--|--|--|--|--|--|--|--|--|--|--|--|--|--|--|--|--|--|--|--|--|--|--|--|--|--|--|--|--|--|--|--|--|--|--|--|--|--|--|--|--|--|--|--|--|--|--|--|--|--|--|--|--|--|--|--|--|--|--|--|--|--|--|--|--|--|--|--|--|--|--|--|--|--|--|--|--|--|--|--|--|--|--|--|--|--|--|--|--|--|--|--|--|--|--|--|--|--|--|--|--|--|--|--|--|--|--|--|--|--|--|--|--|--|--|--|--|--|--|--|--|--|--|--|--|--|--|--|--|--|--|--|--|--|--|--|--|--|--|--|--|--|--|--|--|--|--|--|--|--|--|--|--|--|--|--|--|--|--|--|--|--|--|--|--|--|--|--|--|--|--|--|--|--|--|--|--|--|--|--|--|--|--|--|--|--|--|--|--|--|--|--|--|--|--|--|--|--|--|--|--|--|--|--|--|--|--|--|--|--|--|--|--|--|--|--|--|--|--|--|--|--|--|--|--|--|--|--|--|--|--|--|--|--|--|--|--|--|--|--|--|--|--|--|--|--|--|--|--|--|--|--|--|--|--|--|--|--|--|--|--|--|--|--|--|--|--|--|--|--|--|--|--|--|--|--|--|--|--|--|--|--|--|--|--|--|--|--|--|--|--|--|--|--|--|--|--|--|--|--|--|--|--|--|--|--|--|--|--|--|--|--|--|--|--|--|--|--|--|--|--|--|--|--|--|--|--|--|--|--|--|--|--|--|--|--|--|--|--|--|--|--|--|--|--|--|--|--|--|--|--|--|--|--|--|--|--|--|--|--|--|--|--|--|--|--|--|--|--|--|--|--|--|--|--|--|--|--|--|--|--|--|--|--|--|--|--|--|--|--|--|--|--|--|--|--|--|--|--|--|--|--|--|--|--|--|--|--|--|--|--|--|--|--|--|--|--|--|--|--|--|--|--|--|--|--|--|--|--|--|--|--|--|--|--|--|--|--|--|--|--|--|--|--|--|--|--|--|--|--|--|--|--|--|--|--|--|--|--|--|--|--|--|--|--|--|--|--|--|--|--|--|--|--|--|--|--|--|--|--|--|--|--|--|--|--|--|--|--|--|--|--|--|--|--|--|--|--|--|--|--|--|--|--|--|--|--|--|--|--|--|--|--|--|--|--|--|--|--|--|--|--|--|--|--|--|--|--|--|--|--|--|--|--|--|--|--|--|--|--|--|--|--|--|--|--|--|--|--|--|--|--|--|--|--|--|--|--|--|--|--|--|--|--|--|--|--|--|--|--|--|--|--|--|--|--|--|--|--|--|--|--|--|--|--|--|--|--|--|--|--|--|--|--|--|--|--|--|--|--|--|--|--|--|--|--|--|--|--|--|--|--|--|--|--|--|--|--|--|--|--|--|--|--|--|--|--|--|--|--|--|--|--|--|--|--|--|--|--|--|--|--|--|--|--|--|--|--|--|--|--|--|--|--|--|--|--|--|--|--|--|--|--|--|--|--|--|--|--|--|--|--|--|--|--|--|--|--|--|--|--|--|--|--|--|--|--|--|--|--|--|--|--|--|--|--|--|--|--|--|--|--|--|--|--|--|--|--|--|--|--|--|--|--|--|--|--|--|--|--|--|--|--|--|--|--|--|--|--|--|--|--|--|--|--|--|--|--|--|--|--|--|--|--|--|--|--|--|--|--|--|--|--|--|--|--|--|--|--|--|--|--|--|--|--|--|--|--|--|--|--|--|--|--|--|--|--|--|--|--|--|--|--|--|--|--|--|--|

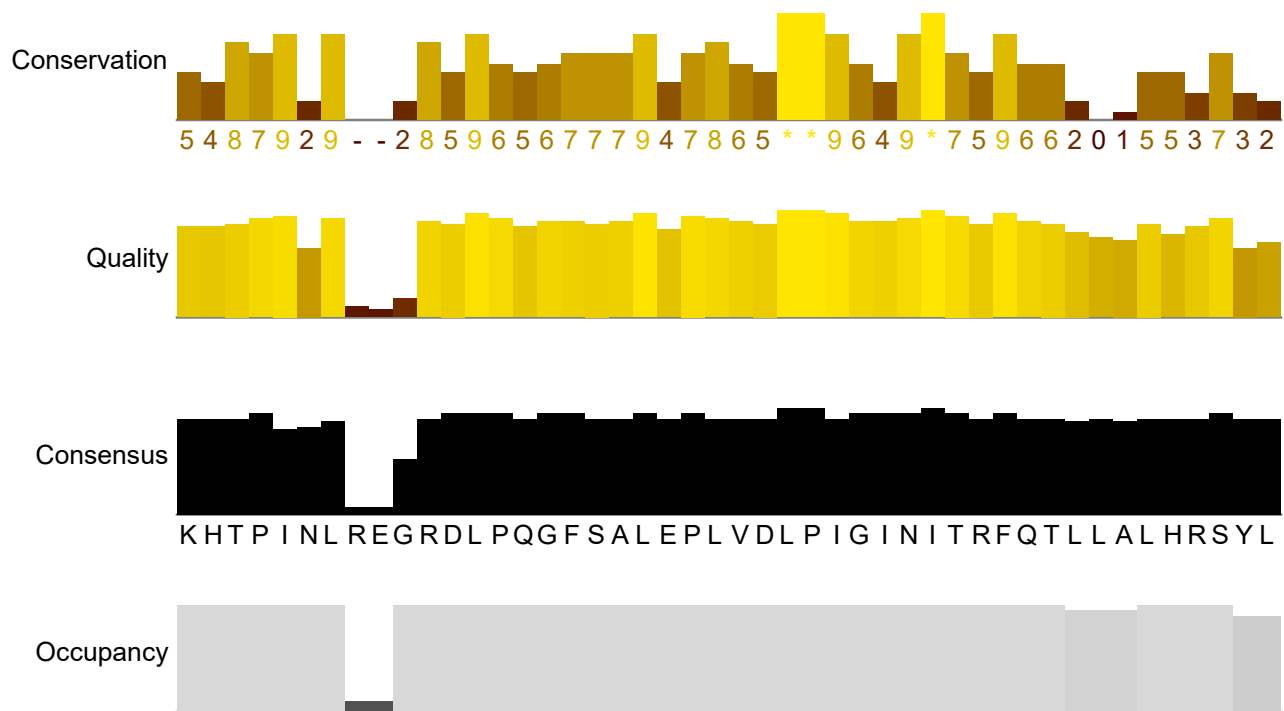

|--|--|--|--|--|--|--|--|--|--|--|--|--|--|--|--|--|--|--|--|--|--|--|--|--|--|--|--|--|--|--|--|--|--|--|--|--|--|--|--|--|--|--|--|--|--|--|--|--|--|--|--|--|--|--|--|--|--|--|--|--|--|--|--|--|--|--|--|--|--|--|--|--|--|--|--|--|--|--|--|--|--|--|--|--|--|--|--|--|--|--|--|--|--|--|--|--|--|--|--|--|--|--|--|--|--|--|--|--|--|--|--|--|--|--|--|--|--|--|--|--|--|--|--|--|--|--|--|--|--|--|--|--|--|--|--|--|--|--|--|--|--|--|--|--|--|--|--|--|--|--|--|--|--|--|--|--|--|--|--|--|--|--|--|--|--|--|--|--|--|--|--|--|--|--|--|--|--|--|--|--|--|--|--|--|--|--|--|--|--|--|--|--|--|--|--|--|--|--|--|--|--|--|--|--|--|--|--|--|--|--|--|--|--|--|--|--|--|--|--|--|--|--|--|--|--|--|--|--|--|--|--|--|--|--|--|--|--|--|--|--|--|--|--|--|--|--|--|--|--|--|--|--|--|--|--|--|--|--|--|--|--|--|--|--|--|--|--|--|--|--|--|--|--|--|--|--|--|--|--|--|--|--|--|--|--|--|--|--|--|--|--|--|--|--|--|--|--|--|--|--|--|--|--|--|--|--|--|--|--|--|--|--|--|--|--|--|--|--|--|--|--|--|--|--|--|--|--|--|--|--|--|--|--|--|--|--|--|--|--|--|--|--|--|--|--|--|--|--|--|--|--|--|--|--|--|--|--|--|--|--|--|--|--|--|--|--|--|--|--|--|--|--|--|--|--|--|--|--|--|--|--|--|--|--|--|--|--|--|--|--|--|--|--|--|--|--|--|--|--|--|--|--|--|--|--|--|--|--|--|--|--|--|--|--|--|--|--|--|--|--|--|--|--|--|--|--|--|--|--|--|--|--|--|--|--|--|--|--|--|--|--|--|--|--|--|--|--|--|--|--|--|--|--|--|--|--|--|--|--|--|--|--|--|--|--|--|--|--|--|--|--|--|--|--|--|--|--|--|--|--|--|--|--|--|--|--|--|--|--|--|--|--|--|--|--|--|--|--|--|--|--|--|--|--|--|--|--|--|--|--|--|--|--|--|--|--|--|--|--|--|--|--|--|--|--|--|--|--|--|--|--|--|--|--|--|--|--|--|--|--|--|--|--|--|--|--|--|--|--|--|--|--|--|--|--|--|--|--|--|--|--|--|--|--|--|--|--|--|--|--|--|--|--|--|--|--|--|--|--|--|--|--|--|--|--|--|--|--|--|--|--|--|--|--|--|--|--|--|--|--|--|--|--|--|--|--|--|--|--|--|--|--|--|--|--|--|--|--|--|--|--|--|--|--|--|--|--|--|--|--|--|--|--|--|--|--|--|--|--|--|--|--|--|--|--|--|--|--|--|--|--|--|--|--|--|--|--|--|--|--|--|--|--|--|--|--|--|--|--|--|--|--|--|--|--|--|--|--|--|--|--|--|--|--|--|--|--|--|--|--|--|--|--|--|--|--|--|--|--|--|--|--|--|--|--|--|--|--|--|--|--|--|--|--|--|--|--|--|--|--|--|--|--|--|--|--|--|--|--|--|--|--|--|--|--|--|--|--|--|--|--|--|--|--|--|--|--|--|--|--|--|--|--|--|--|--|--|--|--|--|--|--|--|--|--|--|--|--|--|--|--|--|--|--|--|--|--|--|--|--|--|--|--|--|--|--|--|--|--|--|--|--|--|--|--|--|--|--|--|--|--|--|--|--|--|--|--|--|--|--|--|--|--|--|--|--|--|--|--|--|--|--|--|--|--|--|--|--|--|--|--|--|--|--|--|--|--|--|--|--|--|--|--|--|--|--|--|--|--|--|--|--|--|--|--|--|--|--|--|--|--|--|--|--|--|--|--|--|--|--|--|--|--|--|--|--|--|--|--|--|--|--|--|--|--|--|--|--|--|--|--|--|--|--|--|--|--|--|--|--|--|--|--|--|--|--|--|--|--|--|--|--|--|--|--|--|--|--|--|--|--|--|--|--|--|--|--|--|--|--|--|--|--|--|--|--|--|--|--|--|--|--|--|--|--|--|--|--|--|--|--|--|--|--|--|--|--|--|--|--|--|--|--|--|--|--|--|--|--|--|--|--|--|--|--|--|--|--|--|--|--|--|--|--|--|--|--|--|--|--|--|--|--|--|--|--|--|--|--|--|--|--|--|--|--|--|--|--|--|--|--|--|--|--|--|--|--|--|--|--|--|--|--|--|--|--|--|--|--|--|--|--|--|--|--|--|--|--|--|--|--|--|--|--|--|--|--|--|--|--|--|--|--|--|--|--|--|--|--|--|--|--|--|--|--|--|--|--|--|--|--|--|--|--|--|--|--|--|--|--|--|--|--|--|--|--|--|--|--|--|--|--|--|--|--|--|--|--|--|--|--|--|--|--|--|--|--|--|--|--|--|--|--|--|--|--|--|--|--|--|--|--|--|--|--|--|--|--|--|--|--|--|--|--|--|--|--|--|--|--|--|--|--|--|--|--|--|--|--|--|--|--|--|--|--|--|--|--|--|--|--|--|--|--|--|--|--|--|--|--|--|--|--|--|--|--|--|--|--|--|--|--|--|--|--|--|--|--|--|--|--|--|--|--|--|--|--|--|--|--|--|--|--|--|--|--|--|--|--|--|--|--|--|--|--|--|--|--|--|--|--|--|--|--|--|--|--|--|--|--|--|--|--|--|--|--|--|--|--|--|--|--|--|--|--|--|--|--|--|--|--|--|--|--|--|--|--|--|--|--|--|--|--|--|--|--|--|--|--|--|--|--|--|--|--|--|--|--|--|--|--|--|--|--|--|--|--|--|--|--|--|--|--|--|--|--|--|--|--|--|--|--|--|--|--|--|--|--|--|--|--|--|--|--|--|--|--|--|--|--|--|--|--|--|--|--|--|--|--|--|--|--|--|--|--|--|--|--|--|--|--|--|--|--|--|--|--|--|--|--|--|--|--|--|--|--|--|--|--|--|--|--|--|--|--|

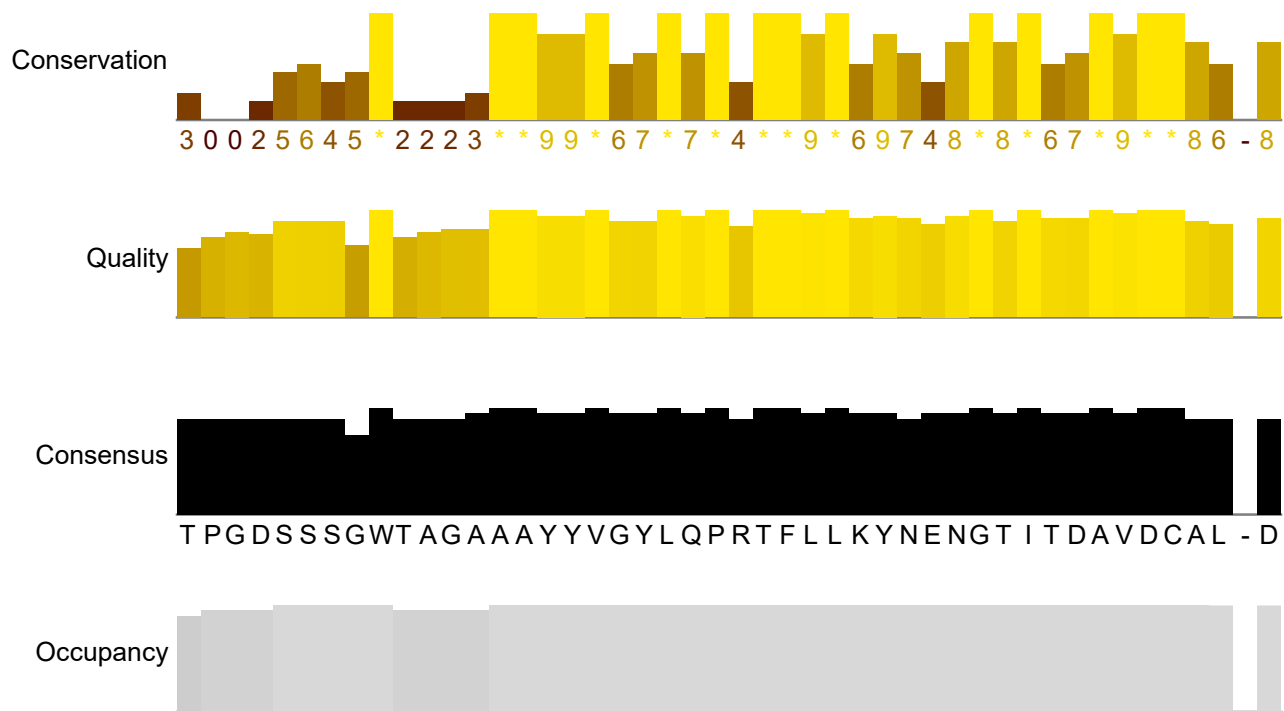

|                                           | 296L                               | 306F | 316S | 326I | 333- |    |
|-------------------------------------------|------------------------------------|------|------|------|------|----|
| <b>SARS-CoV-2-Wuhan-Hu-1_spike/1-1273</b> | PLSETKCTLKSFTVEKGIYQTSNFRVQPTESIVR | FPNI | ---- | TN   |      |    |
| <i>SARS-CoV-Urbani_spike/1-1255</i>       | PLAELKCSVKSEIDKGIYQTSNFRVVP        | SGD  | VVR  | FPNI | ---- | TN |
| <i>MERS-CoV_spike/1-1353</i>              | DLSQLHCSYESFDVESGVVSVSSFEAKPSGS    | SVVE | QAE  | ---- | GV   |    |
| <i>Alpha_B.1.1.7/1-1270</i>               | PLSETKCTLKSFTVEKGIYQTSNFRVQPTESIVR | FPNI | ---- | TN   |      |    |
| <i>Beta_B.1.351/1-1270</i>                | PLSETKCTLKSFTVEKGIYQTSNFRVQPTESIVR | FPNI | ---- | TN   |      |    |
| <i>Delta_B.1.617.2_spike/1-1271</i>       | PLSETKCTLKSFTVEKGIYQTSNFRVQPTESIVR | FPNI | ---- | TN   |      |    |
| <i>Gamma_P.1_spike/1-1273</i>             | PLSETKCTLKSFTVEKGIYQTSNFRVQPTESIVR | FPNI | ---- | TN   |      |    |
| <i>Omicron_B.1.1.529_spike/1-1273</i>     | PLSETKCTLKSFTVEKGIYQTSNFRVQPTESIVR | FPNI | ---- | TN   |      |    |
| <i>Omicron_BA.1_spike/1-1270</i>          | PLSETKCTLKSFTVEKGIYQTSNFRVQPTESIVR | FPNI | ---- | TN   |      |    |
| <i>Omicron_BA.1.1_spike/1-1270</i>        | PLSETKCTLKSFTVEKGIYQTSNFRVQPTESIVR | FPNI | ---- | TN   |      |    |
| <i>Omicron_BA.2_spike/1-1270</i>          | PLSETKCTLKSFTVEKGIYQTSNFRVQPTESIVR | FPNI | ---- | TN   |      |    |
| <i>Omicron_BA.2.12.1_spike/1-1270</i>     | PLSETKCTLKSFTVEKGIYQTSNFRVQPTESIVR | FPNI | ---- | TN   |      |    |
| <i>Omicron_BA.2.75_spike/1-1269</i>       | PLSETKCTLKSFTVEKGIYQTSNFRVQPTESIVR | FPNI | ---- | TN   |      |    |
| <i>Omicron_BA.2.75.2_spike/1-1270</i>     | PLSETKCTLKSFTVEKGIYQTSNFRVQPTESIVR | FPNI | ---- | TN   |      |    |
| <i>Omicron_BA.4_spike/1-1268</i>          | PLSETKCTLKSFTVEKGIYQTSNFRVQPTESIVR | FPNI | ---- | TN   |      |    |
| <i>Omicron_BA.4.6_spike/1-1268</i>        | PLSETKCTLKSFTVEKGIYQTSNFRVQPTESIVR | FPNI | ---- | TN   |      |    |
| <i>Omicron_BA.5_spike/1-1268</i>          | PLSETKCTLKSFTVEKGIYQTSNFRVQPTESIVR | FPNI | ---- | TN   |      |    |
| <i>Omicron_BA.5.2.6_spike/1-1268</i>      | PLSETKCTLKSFTVEKGIYQTSNFRVQPTESIVR | FPNI | ---- | TN   |      |    |
| <i>Omicron_BF.11_spike/1-1268</i>         | PLSETKCTLKSFTVEKGIYQTSNFRVQPTESIVR | FPNI | ---- | TN   |      |    |
| <i>Omicron_BF.7_spike/1-1268</i>          | PLSETKCTLKSFTVEKGIYQTSNFRVQPTESIVR | FPNI | ---- | TN   |      |    |
| <i>Omicron_BN.1_spike/1-1270</i>          | PLSETKCTLKSFTVEKGIYQTSNFRVQPTESIVR | FPNI | ---- | TN   |      |    |
| <i>Omicron_BQ.1_spike/1-1267</i>          | PLSETKCTLKSFTVEKGIYQTSNFRVQPTESIVR | FPNI | ---- | TN   |      |    |
| <i>Omicron_BQ.1.1_spike/1-1267</i>        | PLSETKCTLKSFTVEKGIYQTSNFRVQPTESIVR | FPNI | ---- | TN   |      |    |
| <i>Omicron_CH.1.1_spike/1-1270</i>        | PLSETKCTLKSFTVEKGIYQTSNFRVQPTESIVR | FPNI | ---- | TN   |      |    |
| <i>Omicron_XBB_spike/1-1269</i>           | PLSETKCTLKSFTVEKGIYQTSNFRVQPTESIVR | FPNI | ---- | TN   |      |    |
| <i>Omicron_XBB.1.5_spike/1-1269</i>       | PLSETKCTLKSFTVEKGIYQTSNFRVQPTESIVR | FPNI | ---- | TN   |      |    |

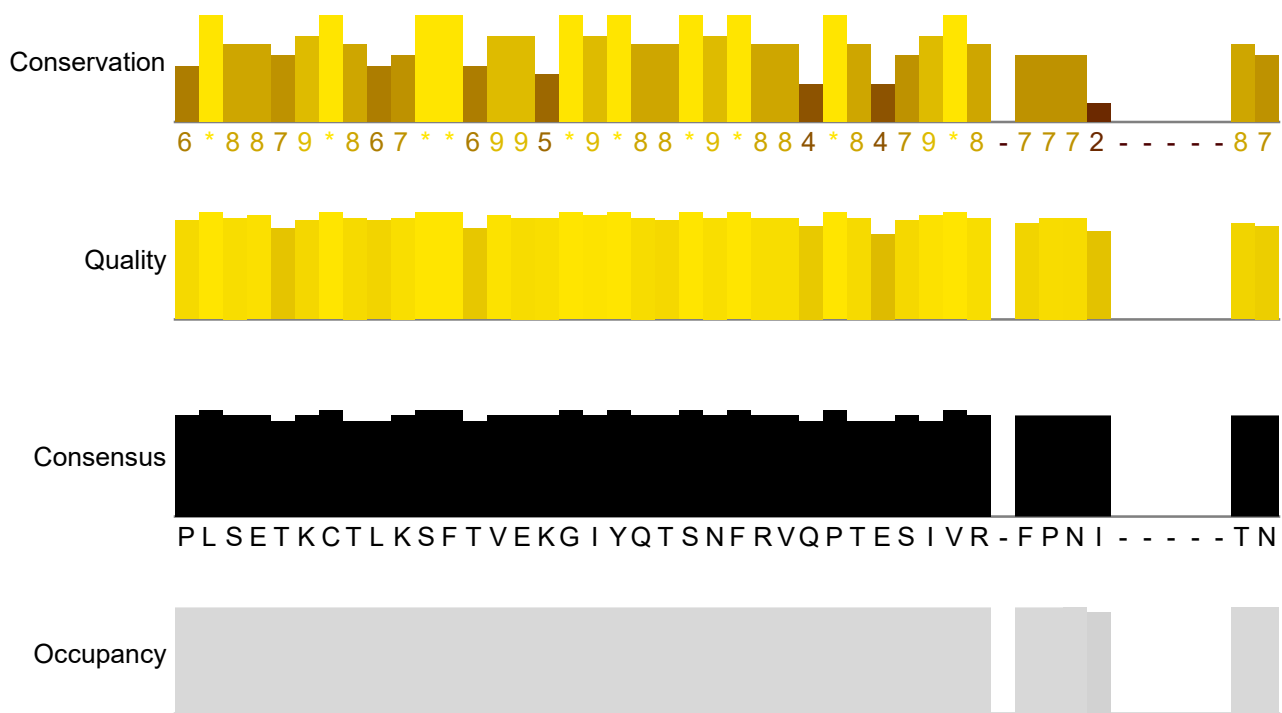



|--|--|--|--|--|--|--|--|--|--|--|--|--|--|--|--|--|--|--|--|--|--|--|--|--|--|--|--|--|--|--|--|--|--|--|--|--|--|--|--|--|--|--|--|--|--|--|--|--|--|--|--|--|--|--|--|--|--|--|--|--|--|--|--|--|--|--|--|--|--|--|--|--|--|--|--|--|--|--|--|--|--|--|--|--|--|--|--|--|--|--|--|--|--|--|--|--|--|--|--|--|--|--|--|--|--|--|--|--|--|--|--|--|--|--|--|--|--|--|--|--|--|--|--|--|--|--|--|--|--|--|--|--|--|--|--|--|--|--|--|--|--|--|--|--|--|--|--|--|--|--|--|--|--|--|--|--|--|--|--|--|--|--|--|--|--|--|--|--|--|--|--|--|--|--|--|--|--|--|--|--|--|--|--|--|--|--|--|--|--|--|--|--|--|--|--|--|--|--|--|--|--|--|--|--|--|--|--|--|--|--|--|--|--|--|--|--|--|--|--|--|--|--|--|--|--|--|--|--|--|--|--|--|--|--|--|--|--|--|--|--|--|--|--|--|--|--|--|--|--|--|--|--|--|--|--|--|--|--|--|--|--|--|--|--|--|--|--|--|--|--|--|--|--|--|--|--|--|--|--|--|--|--|--|--|--|--|--|--|--|--|--|--|--|--|--|--|--|--|--|--|--|--|--|--|--|--|--|--|--|--|--|--|--|--|--|--|--|--|--|--|--|--|--|--|--|--|--|--|--|--|--|--|--|--|--|--|--|--|--|--|--|--|--|--|--|--|--|--|--|--|--|--|--|--|--|--|--|--|--|--|--|--|--|--|--|--|--|--|--|--|--|--|--|--|--|--|--|--|--|--|--|--|--|--|--|--|--|--|--|--|--|--|--|--|--|--|--|--|--|--|--|--|--|--|--|--|--|--|--|--|--|--|--|--|--|--|--|--|--|--|--|--|--|--|--|--|--|--|--|--|--|--|--|--|--|--|--|--|--|--|--|--|--|--|--|--|--|--|--|--|--|--|--|--|--|--|--|--|--|--|--|--|--|--|--|--|--|--|--|--|--|--|--|--|--|--|--|--|--|--|--|--|--|--|--|--|--|--|--|--|--|--|--|--|--|--|--|--|--|--|--|--|--|--|--|--|--|--|--|--|--|--|--|--|--|--|--|--|--|--|--|--|--|--|--|--|--|--|--|--|--|--|--|--|--|--|--|--|--|--|--|--|--|--|--|--|--|--|--|--|--|--|--|--|--|--|--|--|--|--|--|--|--|--|--|--|--|--|--|--|--|--|--|--|--|--|--|--|--|--|--|--|--|--|--|--|--|--|--|--|--|--|--|--|--|--|--|--|--|--|--|--|--|--|--|--|--|--|--|--|--|--|--|--|--|--|--|--|--|--|--|--|--|--|--|--|--|--|--|--|--|--|--|--|--|--|--|--|--|--|--|--|--|--|--|--|--|--|--|--|--|--|--|--|--|--|--|--|--|--|--|--|--|--|--|--|--|--|--|--|--|--|--|--|--|--|--|--|--|--|--|--|--|--|--|--|--|--|--|--|--|--|--|--|--|--|--|--|--|--|--|--|--|--|--|--|--|--|--|--|--|--|--|--|--|--|--|--|--|--|--|--|--|--|--|--|--|--|--|--|--|--|--|--|--|--|--|--|--|--|--|--|--|--|--|--|--|--|--|--|--|--|--|--|--|--|--|--|--|--|--|--|--|--|--|--|--|--|--|--|--|--|--|--|--|--|--|--|--|--|--|--|--|--|--|--|--|--|--|--|--|--|--|--|--|--|--|--|--|--|--|--|--|--|--|--|--|--|--|--|--|--|--|--|--|--|--|--|--|--|--|--|--|--|--|--|--|--|--|--|--|--|--|--|--|--|--|--|--|--|--|--|--|--|--|--|--|--|--|--|--|--|--|--|--|--|--|--|--|--|--|--|--|--|--|--|--|--|--|--|--|--|--|--|--|--|--|--|--|--|--|--|--|--|--|--|--|--|--|--|--|--|--|--|--|--|--|--|--|--|--|--|--|--|--|--|--|--|--|--|--|--|--|--|--|--|--|--|--|--|--|--|--|--|--|--|--|--|--|--|--|--|--|--|--|--|--|--|--|--|--|--|--|--|--|--|--|--|--|--|--|--|--|--|--|--|--|--|--|--|--|--|--|--|--|--|--|--|--|--|--|--|--|--|--|--|--|--|--|--|--|--|--|--|--|--|--|--|--|--|--|--|--|--|--|--|--|--|--|--|--|--|--|--|--|--|--|--|--|--|--|--|--|--|--|--|--|--|--|--|--|--|--|--|--|--|--|--|--|--|--|--|--|--|--|--|--|--|--|--|--|--|--|--|--|--|--|--|--|--|--|--|--|--|--|--|--|--|--|--|--|--|--|--|--|--|--|--|--|--|--|--|--|--|--|--|--|--|--|--|--|--|--|--|--|--|--|--|--|--|--|--|--|--|--|--|--|--|--|--|--|--|--|--|--|--|--|--|--|--|--|--|--|--|--|--|--|--|--|--|--|--|--|--|--|--|--|--|--|--|--|--|--|--|--|--|--|--|--|--|--|--|--|--|--|--|--|--|--|--|--|--|--|--|--|--|--|--|--|--|--|--|--|--|--|--|--|--|--|--|--|--|--|--|--|--|--|--|--|--|--|--|--|--|--|--|--|--|--|--|--|--|--|--|--|--|--|--|--|--|--|--|--|--|--|--|--|--|--|--|--|--|--|--|--|--|--|--|--|--|--|--|--|--|--|--|--|--|--|--|--|--|--|--|--|--|--|--|--|--|--|--|--|--|--|--|--|--|--|--|--|--|--|--|--|--|--|--|--|--|--|--|--|--|--|--|--|--|--|--|--|--|--|--|--|--|--|--|--|--|--|--|--|--|--|--|--|--|--|--|--|--|--|--|--|--|--|--|--|--|--|--|--|--|--|--|--|--|--|--|--|--|--|--|--|--|--|--|--|--|--|--|--|--|--|--|--|--|--|--|--|--|--|--|--|--|--|--|--|--|--|--|--|--|--|--|--|--|--|--|--|--|--|--|--|--|--|--|--|--|--|--|--|--|--|

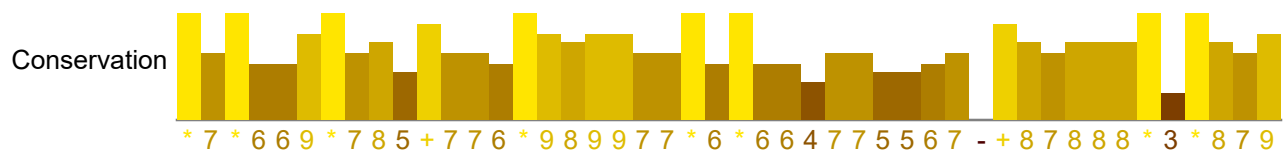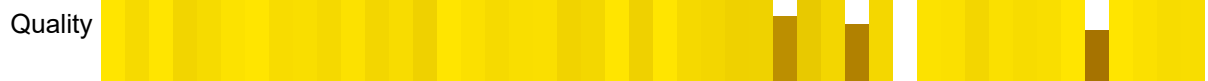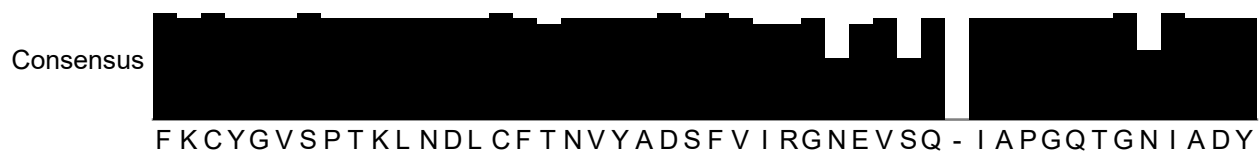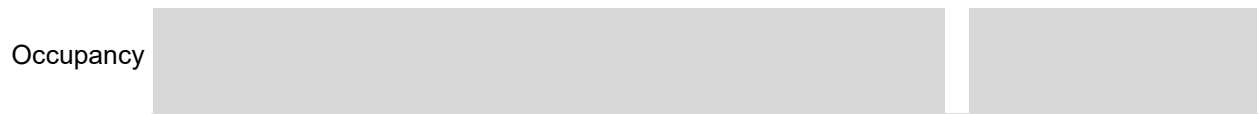







|                                           |           | 449- |   | 458K |   | 467D |   | 477S |   |   |   |   |   |   |   |   |   |   |   |   |   |   |   |   |   |   |   |   |   |   |   |   |   |   |   |   |   |   |   |
|-------------------------------------------|-----------|------|---|------|---|------|---|------|---|---|---|---|---|---|---|---|---|---|---|---|---|---|---|---|---|---|---|---|---|---|---|---|---|---|---|---|---|---|---|
| <b>SARS-CoV-2-Wuhan-Hu-1_spike/1-1273</b> | - - - - - | Y    | N | L    | Y | R    | L | F    | R | K | S | N | L | K | P | - | F | E | R | D | I | S | T | E | I | Y | Q | A | G | S | T | P | C | N | G | V | E | G |   |
| <i>SARS-CoV-Urbani_spike/1-1255</i>       | - - - - - | Y    | N | Y    | K | Y    | R | Y    | L | R | H | G | K | L | R | P | - | F | E | R | D | I | S | N | V | P | F | S | P | D | G | K | P | C | T | P | - | P | A |
| <i>MERS-CoV_spike/1-1353</i>              | - - - - - | L    | K | Y    | S | Y    | I | N    | K | C | S | R | L | L | S | D | - | D | R | T | E | V | P | Q | L | V | N | A | N | Q | Y | S | P | C | V | S | I | V | P |
| <i>Alpha_B.1.1.7/1-1270</i>               | - - - - - | Y    | N | L    | Y | R    | L | F    | R | K | S | N | L | K | P | - | F | E | R | D | I | S | T | E | I | Y | Q | A | G | S | T | P | C | N | G | V | E | G |   |
| <i>Beta_B.1.351/1-1270</i>                | - - - - - | Y    | N | L    | Y | R    | L | F    | R | K | S | N | L | K | P | - | F | E | R | D | I | S | T | E | I | Y | Q | A | G | S | T | P | C | N | G | V | K | G |   |
| <i>Delta_B.1.617.2_spike/1-1271</i>       | - - - - - | Y    | N | Y    | R | Y    | R | L    | F | R | K | S | N | L | K | P | - | F | E | R | D | I | S | T | E | I | Y | Q | A | G | S | K | P | C | N | G | V | E | G |
| <i>Gamma_P.1_spike/1-1273</i>             | - - - - - | Y    | N | L    | Y | R    | L | F    | R | K | S | N | L | K | P | - | F | E | R | D | I | S | T | E | I | Y | Q | A | G | S | T | P | C | N | G | V | K | G |   |
| <i>Omicron_B.1.1.529_spike/1-1273</i>     | - - - - - | Y    | N | L    | Y | R    | L | F    | R | K | S | N | L | K | P | - | F | E | R | D | I | S | T | E | I | Y | Q | A | G | S | T | P | C | N | G | V | E | G |   |
| <i>Omicron_BA.1_spike/1-1270</i>          | - - - - - | Y    | N | L    | Y | R    | L | F    | R | K | S | N | L | K | P | - | F | E | R | D | I | S | T | E | I | Y | Q | A | G | N | K | P | C | N | G | V | A | G |   |
| <i>Omicron_BA.1.1_spike/1-1270</i>        | - - - - - | Y    | N | L    | Y | R    | L | F    | R | K | S | N | L | K | P | - | F | E | R | D | I | S | T | E | I | Y | Q | A | G | N | K | P | C | N | G | V | A | G |   |
| <i>Omicron_BA.2_spike/1-1270</i>          | - - - - - | Y    | N | L    | Y | R    | L | F    | R | K | S | N | L | K | P | - | F | E | R | D | I | S | T | E | I | Y | Q | A | G | N | K | P | C | N | G | V | A | G |   |
| <i>Omicron_BA.2.12.1_spike/1-1270</i>     | - - - - - | Y    | N | Y    | Q | Y    | R | L    | F | R | K | S | N | L | K | P | - | F | E | R | D | I | S | T | E | I | Y | Q | A | G | N | K | P | C | N | G | V | A | G |
| <i>Omicron_BA.2.75_spike/1-1269</i>       | - - - - - | Y    | N | L    | Y | R    | L | F    | R | K | S | N | L | K | P | - | F | E | R | D | I | S | T | E | I | Y | Q | A | G | N | K | P | C | N | G | V | A | G |   |
| <i>Omicron_BA.2.75.2_spike/1-1270</i>     | - - - - - | Y    | N | L    | Y | R    | L | F    | R | K | S | K | L | K | P | - | F | E | R | D | I | S | T | E | I | Y | Q | A | G | N | K | P | C | N | G | V | A | G |   |
| <i>Omicron_BA.4_spike/1-1268</i>          | - - - - - | Y    | N | Y    | R | Y    | R | L    | F | R | K | S | N | L | K | P | - | F | E | R | D | I | S | T | E | I | Y | Q | A | G | N | K | P | C | N | G | V | A | G |
| <i>Omicron_BA.4.6_spike/1-1268</i>        | - - - - - | Y    | N | Y    | R | Y    | R | L    | F | R | K | S | N | L | K | P | - | F | E | R | D | I | S | T | E | I | Y | Q | A | G | N | K | P | C | N | G | V | A | G |
| <i>Omicron_BA.5_spike/1-1268</i>          | - - - - - | Y    | N | L    | Y | R    | L | F    | R | K | S | N | L | K | P | - | F | E | R | D | I | S | T | E | I | Y | Q | A | G | N | K | P | C | N | G | V | A | G |   |
| <i>Omicron_BA.5.2.6_spike/1-1268</i>      | - - - - - | Y    | N | Y    | R | Y    | R | L    | F | R | K | S | N | L | K | P | - | F | E | R | D | I | S | T | E | I | Y | Q | A | G | N | K | P | C | N | G | V | A | G |
| <i>Omicron_BF.11_spike/1-1268</i>         | - - - - - | Y    | N | Y    | R | Y    | R | L    | F | R | K | S | N | L | K | P | - | F | E | R | D | I | S | T | E | I | Y | Q | A | G | N | K | P | C | N | G | V | A | G |
| <i>Omicron_BF.7_spike/1-1268</i>          | - - - - - | Y    | N | Y    | R | Y    | R | L    | F | R | K | S | N | L | K | P | - | F | E | R | D | I | S | T | E | I | Y | Q | A | G | N | K | P | C | N | G | V | A | G |
| <i>Omicron_BN.1_spike/1-1270</i>          | - - - - - | Y    | N | L    | Y | R    | L | F    | R | K | S | K | L | K | P | - | F | E | R | D | I | S | T | E | I | Y | Q | A | G | N | K | P | C | N | G | V | A | G |   |
| <i>Omicron_BQ.1_spike/1-1267</i>          | - - - - - | Y    | N | Y    | R | Y    | R | L    | F | R | K | S | K | L | K | P | - | F | E | R | D | I | S | T | E | I | Y | Q | A | G | N | K | P | C | N | G | V | A | G |
| <i>Omicron_BQ.1.1_spike/1-1267</i>        | - - - - - | Y    | N | Y    | R | Y    | R | L    | F | R | K | S | K | L | K | P | - | F | E | R | D | I | S | T | E | I | Y | Q | A | G | N | K | P | C | N | G | V | A | G |
| <i>Omicron_CH.1.1_spike/1-1270</i>        | - - - - - | Y    | N | Y    | R | Y    | R | L    | F | R | K | S | K | L | K | P | - | F | E | R | D | I | S | T | E | I | Y | Q | A | G | N | K | P | C | N | G | V | A | G |
| <i>Omicron_XBB_spike/1-1269</i>           | - - - - - | Y    | N | L    | Y | R    | L | F    | R | K | S | K | L | K | P | - | F | E | R | D | I | S | T | E | I | Y | Q | A | G | N | K | P | C | N | G | V | A | G |   |
| <i>Omicron_XBB.1.5_spike/1-1269</i>       | - - - - - | Y    | N | L    | Y | R    | L | F    | R | K | S | K | L | K | P | - | F | E | R | D | I | S | T | E | I | Y | Q | A | G | N | K | P | C | N | G | V | A | G |   |

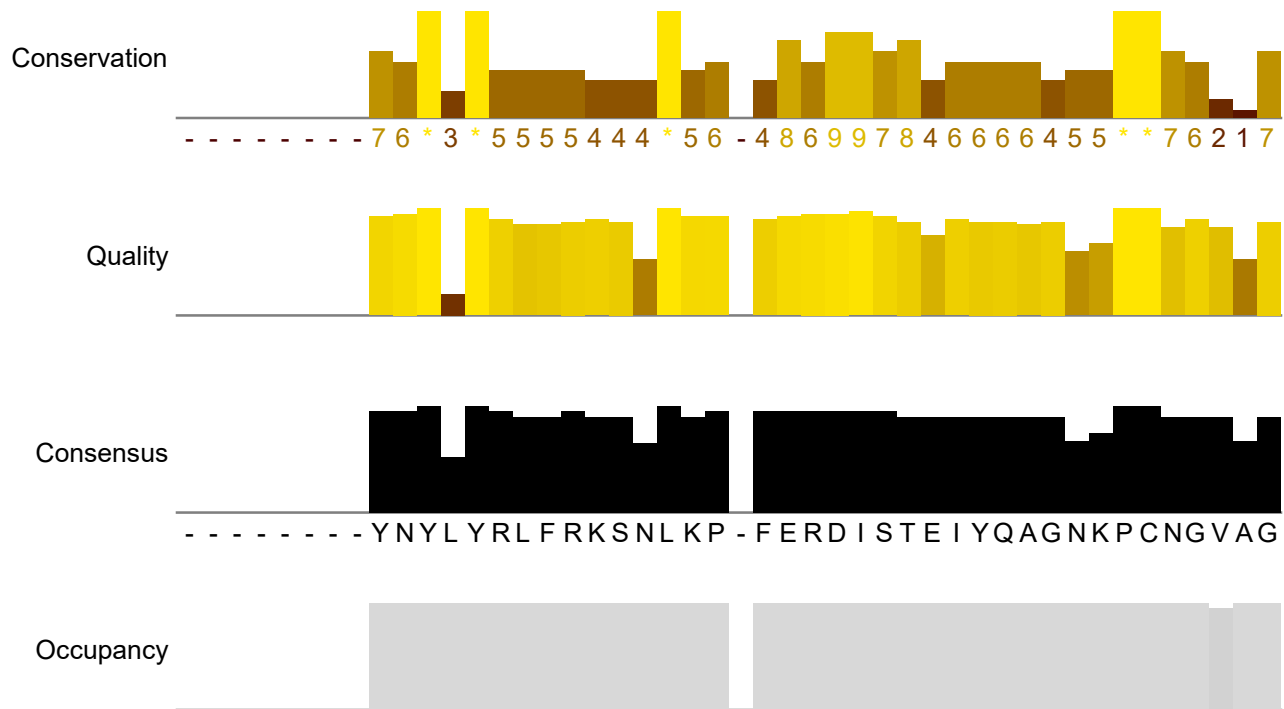

|                                           |          |          |   |      |   |      |   |      |   |      |                                                       |
|-------------------------------------------|----------|----------|---|------|---|------|---|------|---|------|-------------------------------------------------------|
|                                           |          | 487N     |   | 488- |   | 489- |   | 489- |   | 490F |                                                       |
| <b>SARS-CoV-2-Wuhan-Hu-1_spike/1-1273</b> | <b>F</b> | <b>N</b> | - | -    | - | -    | - | -    | - | -    | <b>Y</b> <b>F</b> <b>P</b> <b>L</b> <b>Q</b> <b>S</b> |
| <i>SARS-CoV-Urbani_spike/1-1255</i>       | <b>L</b> | <b>N</b> | - | -    | - | -    | - | -    | - | -    | <b>Y</b> <b>W</b> <b>P</b> <b>L</b> <b>N</b> <b>D</b> |
| <i>MERS-CoV_spike/1-1353</i>              | <b>S</b> | <b>T</b> | - | -    | - | -    | - | -    | - | -    | <b>L</b> <b>S</b> <b>P</b> <b>L</b> <b>E</b> <b>G</b> |
| <i>Alpha_B.1.1.7/1-1270</i>               | <b>F</b> | <b>N</b> | - | -    | - | -    | - | -    | - | -    | <b>Y</b> <b>F</b> <b>P</b> <b>L</b> <b>Q</b> <b>S</b> |
| <i>Beta_B.1.351/1-1270</i>                | <b>F</b> | <b>N</b> | - | -    | - | -    | - | -    | - | -    | <b>Y</b> <b>F</b> <b>P</b> <b>L</b> <b>Q</b> <b>S</b> |
| <i>Delta_B.1.617.2_spike/1-1271</i>       | <b>F</b> | <b>N</b> | - | -    | - | -    | - | -    | - | -    | <b>Y</b> <b>F</b> <b>P</b> <b>L</b> <b>Q</b> <b>S</b> |
| <i>Gamma_P.1_spike/1-1273</i>             | <b>F</b> | <b>N</b> | - | -    | - | -    | - | -    | - | -    | <b>Y</b> <b>F</b> <b>P</b> <b>L</b> <b>Q</b> <b>S</b> |
| <i>Omicron_B.1.1.529_spike/1-1273</i>     | <b>F</b> | <b>N</b> | - | -    | - | -    | - | -    | - | -    | <b>Y</b> <b>F</b> <b>P</b> <b>L</b> <b>Q</b> <b>S</b> |
| <i>Omicron_BA.1_spike/1-1270</i>          | <b>F</b> | <b>N</b> | - | -    | - | -    | - | -    | - | -    | <b>Y</b> <b>F</b> <b>P</b> <b>L</b> <b>R</b> <b>S</b> |
| <i>Omicron_BA.1.1_spike/1-1270</i>        | <b>F</b> | <b>N</b> | - | -    | - | -    | - | -    | - | -    | <b>Y</b> <b>F</b> <b>P</b> <b>L</b> <b>R</b> <b>S</b> |
| <i>Omicron_BA.2_spike/1-1270</i>          | <b>F</b> | <b>N</b> | - | -    | - | -    | - | -    | - | -    | <b>Y</b> <b>F</b> <b>P</b> <b>L</b> <b>R</b> <b>S</b> |
| <i>Omicron_BA.2.12.1_spike/1-1270</i>     | <b>F</b> | <b>N</b> | - | -    | - | -    | - | -    | - | -    | <b>Y</b> <b>F</b> <b>P</b> <b>L</b> <b>R</b> <b>S</b> |
| <i>Omicron_BA.2.75_spike/1-1269</i>       | <b>S</b> | <b>N</b> | - | -    | - | -    | - | -    | - | -    | <b>Y</b> <b>F</b> <b>P</b> <b>L</b> <b>Q</b> <b>S</b> |
| <i>Omicron_BA.2.75.2_spike/1-1270</i>     | <b>S</b> | <b>N</b> | - | -    | - | -    | - | -    | - | -    | <b>Y</b> <b>F</b> <b>P</b> <b>L</b> <b>Q</b> <b>S</b> |
| <i>Omicron_BA.4_spike/1-1268</i>          | <b>V</b> | <b>N</b> | - | -    | - | -    | - | -    | - | -    | <b>Y</b> <b>F</b> <b>P</b> <b>L</b> <b>Q</b> <b>S</b> |
| <i>Omicron_BA.4.6_spike/1-1268</i>        | <b>V</b> | <b>N</b> | - | -    | - | -    | - | -    | - | -    | <b>Y</b> <b>L</b> <b>P</b> <b>L</b> <b>Q</b> <b>S</b> |
| <i>Omicron_BA.5_spike/1-1268</i>          | <b>V</b> | <b>N</b> | - | -    | - | -    | - | -    | - | -    | <b>Y</b> <b>F</b> <b>P</b> <b>L</b> <b>Q</b> <b>S</b> |
| <i>Omicron_BA.5.2.6_spike/1-1268</i>      | <b>V</b> | <b>N</b> | - | -    | - | -    | - | -    | - | -    | <b>Y</b> <b>F</b> <b>P</b> <b>L</b> <b>Q</b> <b>S</b> |
| <i>Omicron_BF.11_spike/1-1268</i>         | <b>V</b> | <b>N</b> | - | -    | - | -    | - | -    | - | -    | <b>Y</b> <b>F</b> <b>P</b> <b>L</b> <b>Q</b> <b>S</b> |
| <i>Omicron_BF.7_spike/1-1268</i>          | <b>V</b> | <b>N</b> | - | -    | - | -    | - | -    | - | -    | <b>Y</b> <b>F</b> <b>P</b> <b>L</b> <b>Q</b> <b>S</b> |
| <i>Omicron_BN.1_spike/1-1270</i>          | <b>F</b> | <b>N</b> | - | -    | - | -    | - | -    | - | -    | <b>Y</b> <b>S</b> <b>P</b> <b>L</b> <b>Q</b> <b>S</b> |
| <i>Omicron_BQ.1_spike/1-1267</i>          | <b>V</b> | <b>N</b> | - | -    | - | -    | - | -    | - | -    | <b>Y</b> <b>F</b> <b>P</b> <b>L</b> <b>Q</b> <b>S</b> |
| <i>Omicron_BQ.1.1_spike/1-1267</i>        | <b>V</b> | <b>N</b> | - | -    | - | -    | - | -    | - | -    | <b>Y</b> <b>F</b> <b>P</b> <b>L</b> <b>Q</b> <b>S</b> |
| <i>Omicron_CH.1.1_spike/1-1270</i>        | <b>S</b> | <b>N</b> | - | -    | - | -    | - | -    | - | -    | <b>Y</b> <b>F</b> <b>P</b> <b>L</b> <b>Q</b> <b>S</b> |
| <i>Omicron_XBB_spike/1-1269</i>           | <b>P</b> | <b>N</b> | - | -    | - | -    | - | -    | - | -    | <b>Y</b> <b>S</b> <b>P</b> <b>L</b> <b>Q</b> <b>S</b> |
| <i>Omicron_XBB.1.5_spike/1-1269</i>       | <b>P</b> | <b>N</b> | - | -    | - | -    | - | -    | - | -    | <b>Y</b> <b>P</b> <b>P</b> <b>L</b> <b>Q</b> <b>S</b> |

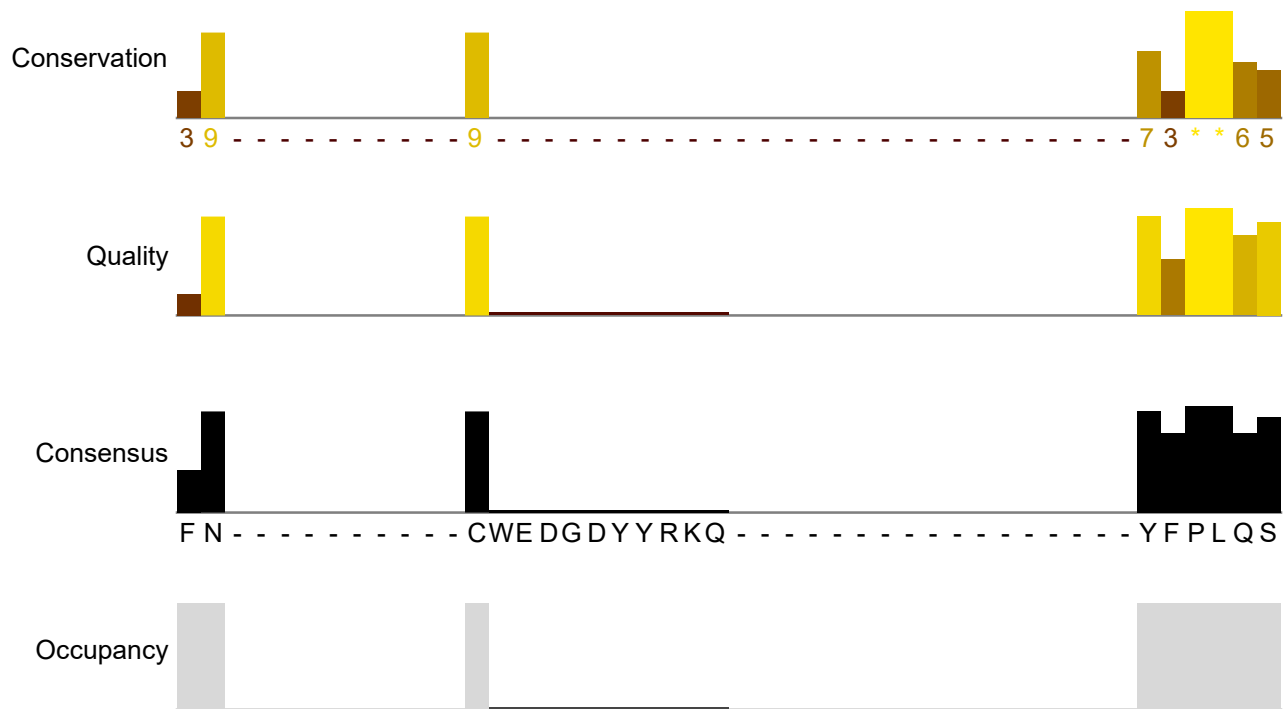





|                                           | 538C                                                             | 548G    | 558K                  | 563Q                  | 572T |
|-------------------------------------------|------------------------------------------------------------------|---------|-----------------------|-----------------------|------|
| <b>SARS-CoV-2-Wuhan-Hu-1_spike/1-1273</b> | KNKCVNFNFNGLTGTGVLTESNKKF                                        | - - - - | LPFQQFGR              | DIADTTD               |      |
| <i>SARS-CoV-Urbani_spike/1-1255</i>       | KNQCVNFNFNGLTGTGVLT <sup>P</sup> SSKRF                           | - - - - | QPFQQFGR              | DVSDFTD               |      |
| <i>MERS-CoV_spike/1-1353</i>              | LGNCV <sup>E</sup> YSLYGV <sup>S</sup> GRGV <sup>F</sup> QNCTAVG | - - - - | VRQQR <sup>F</sup> VY | DAYQNLV               |      |
| <i>Alpha_B.1.1.7/1-1270</i>               | KNKCVNFNFNGLTGTGVLTESNKKF                                        | - - - - | LPFQQFGR              | DI <sup>I</sup> DDTTD |      |
| <i>Beta_B.1.351/1-1270</i>                | KNKCVNFNFNGLTGTGVLTESNKKF                                        | - - - - | LPFQQFGR              | DIADTTD               |      |
| <i>Delta_B.1.617.2_spike/1-1271</i>       | KNKCVNFNFNGLTGTGVLTESNKKF                                        | - - - - | LPFQQFGR              | DIADTTD               |      |
| <i>Gamma_P.1_spike/1-1273</i>             | KNKCVNFNFNGLTGTGVLTESNKKF                                        | - - - - | LPFQQFGR              | DIADTTD               |      |
| <i>Omicron_B.1.1.529_spike/1-1273</i>     | KNKCVNFNFNGLTGTGVLTESNKKF                                        | - - - - | LPFQQFGR              | DIADTTD               |      |
| <i>Omicron_BA.1_spike/1-1270</i>          | KNKCVNFNFNGL <sup>K</sup> GTGVLTESNKKF                           | - - - - | LPFQQFGR              | DIADTTD               |      |
| <i>Omicron_BA.1.1_spike/1-1270</i>        | KNKCVNFNFNGL <sup>K</sup> GTGVLTESNKKF                           | - - - - | LPFQQFGR              | DIADTTD               |      |
| <i>Omicron_BA.2_spike/1-1270</i>          | KNKCVNFNFNGLTGTGVLTESNKKF                                        | - - - - | LPFQQFGR              | DIADTTD               |      |
| <i>Omicron_BA.2.12.1_spike/1-1270</i>     | KNKCVNFNFNGLTGTGVLTESNKKF                                        | - - - - | LPFQQFGR              | DIADTTD               |      |
| <i>Omicron_BA.2.75_spike/1-1269</i>       | KNKCVNFNFNGLTGTGVLTESNKKF                                        | - - - - | LPFQQFGR              | DIADTTD               |      |
| <i>Omicron_BA.2.75.2_spike/1-1270</i>     | KNKCVNFNFNGLTGTGVLTESNKKF                                        | - - - - | LPFQQFGR              | DIADTTD               |      |
| <i>Omicron_BA.4_spike/1-1268</i>          | KNKCVNFNFNGLTGTGVLTESNKKF                                        | - - - - | LPFQQFGR              | DIADTTD               |      |
| <i>Omicron_BA.4.6_spike/1-1268</i>        | KNKCVNFNFNGLTGTGVLTESNKKF                                        | - - - - | LPFQQFGR              | DIADTTD               |      |
| <i>Omicron_BA.5_spike/1-1268</i>          | KNKCVNFNFNGLTGTGVLTESNKKF                                        | - - - - | LPFQQFGR              | DIADTTD               |      |
| <i>Omicron_BA.5.2.6_spike/1-1268</i>      | KNKCVNFNFNGLTGTGVLTESNKKF                                        | - - - - | LPFQQFGR              | DIADTTD               |      |
| <i>Omicron_BF.11_spike/1-1268</i>         | KNKCVNFNFNGLTGTGVLTESNKKF                                        | - - - - | LPFQQFGR              | DIADTTD               |      |
| <i>Omicron_BF.7_spike/1-1268</i>          | KNKCVNFNFNGLTGTGVLTESNKKF                                        | - - - - | LPFQQFGR              | DIADTTD               |      |
| <i>Omicron_BN.1_spike/1-1270</i>          | KNKCVNFNFNGLTGTGVLTESNKKF                                        | - - - - | LPFQQFGR              | DIADTTD               |      |
| <i>Omicron_BQ.1_spike/1-1267</i>          | KNKCVNFNFNGLTGTGVLTESNKKF                                        | - - - - | LPFQQFGR              | DIADTTD               |      |
| <i>Omicron_BQ.1.1_spike/1-1267</i>        | KNKCVNFNFNGLTGTGVLTESNKKF                                        | - - - - | LPFQQFGR              | DIADTTD               |      |
| <i>Omicron_CH.1.1_spike/1-1270</i>        | KNKCVNFNFNGLTGTGVLTESNKKF                                        | - - - - | LPFQQFGR              | DIADTTD               |      |
| <i>Omicron_XBB_spike/1-1269</i>           | KNKCVNFNFNGLTGTGVLTESNKKF                                        | - - - - | LPFQQFGR              | DIADTTD               |      |
| <i>Omicron_XBB.1.5_spike/1-1269</i>       | KNKCVNFNFNGLTGTGVLTESNKKF                                        | - - - - | LPFQQFGR              | DIADTTD               |      |

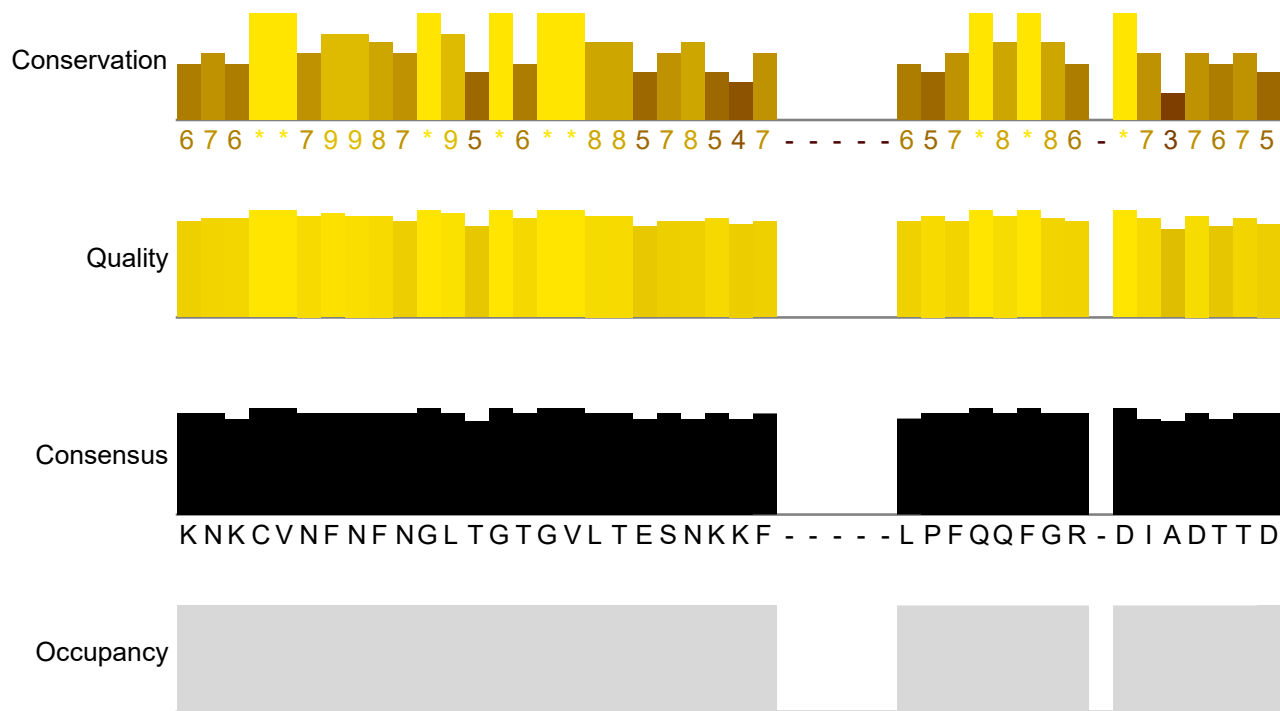



|                                           | 618T                            | 628Q                                                | 636Y                                                | 646R  | 656V |
|-------------------------------------------|---------------------------------|-----------------------------------------------------|-----------------------------------------------------|-------|------|
| <b>SARS-CoV-2-Wuhan-Hu-1_spike/1-1273</b> | C T E V P V A I H A D Q L T     | - -                                                 | P T W R V Y S T G S N V F Q T R A G C L I G A E H V | - - - | -    |
| <i>SARS-CoV-Urbani_spike/1-1255</i>       | C T D V S T A I H A D Q L T     | - -                                                 | P A W R I Y S T G N N V F Q T Q A G C L I G A E H V | - - - | -    |
| <i>MERS-CoV_spike/1-1353</i>              | C E H I S S T M S Q Y S R S T R | S M L K R R D S T Y G P L Q T P V G C V L G L V N S | - - -                                               | -     | -    |
| <i>Alpha_B.1.1.7/1-1270</i>               | C T E V P V A I H A D Q L T     | - -                                                 | P T W R V Y S T G S N V F Q T R A G C L I G A E H V | - - - | -    |
| <i>Beta_B.1.351/1-1270</i>                | C T E V P V A I H A D Q L T     | - -                                                 | P T W R V Y S T G S N V F Q T R A G C L I G A E H V | - - - | -    |
| <i>Delta_B.1.617.2_spike/1-1271</i>       | C T E V P V A I H A D Q L T     | - -                                                 | P T W R V Y S T G S N V F Q T R A G C L I G A E H V | - - - | -    |
| <i>Gamma_P.1_spike/1-1273</i>             | C T E V P V A I H A D Q L T     | - -                                                 | P T W R V Y S T G S N V F Q T R A G C L I G A E Y V | - - - | -    |
| <i>Omicron_B.1.1.529_spike/1-1273</i>     | C T E V P V A I H A D Q L T     | - -                                                 | P T W R V Y S T G S N V F Q T R A G C L I G A E Y V | - - - | -    |
| <i>Omicron_BA.1_spike/1-1270</i>          | C T E V P V A I H A D Q L T     | - -                                                 | P T W R V Y S T G S N V F Q T R A G C L I G A E Y V | - - - | -    |
| <i>Omicron_BA.1.1_spike/1-1270</i>        | C T E V P V A I H A D Q L T     | - -                                                 | P T W R V Y S T G S N V F Q T R A G C L I G A E Y V | - - - | -    |
| <i>Omicron_BA.2_spike/1-1270</i>          | C T E V P V A I H A D Q L T     | - -                                                 | P T W R V Y S T G S N V F Q T R A G C L I G A E Y V | - - - | -    |
| <i>Omicron_BA.2.12.1_spike/1-1270</i>     | C T E V P V A I H A D Q L T     | - -                                                 | P T W R V Y S T G S N V F Q T R A G C L I G A E Y V | - - - | -    |
| <i>Omicron_BA.2.75_spike/1-1269</i>       | C T E V P V A I H A D Q L T     | - -                                                 | P T W R V Y S T G S N V F Q T R A G C L I G A E Y V | - - - | -    |
| <i>Omicron_BA.2.75.2_spike/1-1270</i>     | C T E V P V A I H A D Q L T     | - -                                                 | P T W R V Y S T G S N V F Q T R A G C L I G A E Y V | - - - | -    |
| <i>Omicron_BA.4_spike/1-1268</i>          | C T E V P V A I H A D Q L T     | - -                                                 | P T W R V Y S T G S N V F Q T R A G C L I G A E Y V | - - - | -    |
| <i>Omicron_BA.4.6_spike/1-1268</i>        | C T E V P V A I H A D Q L T     | - -                                                 | P T W R V Y S T G S N V F Q T R A G C L I G A E Y V | - - - | -    |
| <i>Omicron_BA.5_spike/1-1268</i>          | C T E V P V A I H A D Q L T     | - -                                                 | P T W R V Y S T G S N V F Q T R A G C L I G A E Y V | - - - | -    |
| <i>Omicron_BA.5.2.6_spike/1-1268</i>      | C T E V P V A I H A D Q L T     | - -                                                 | P T W R V Y S T G S N V F Q T R A G C L I G A E Y V | - - - | -    |
| <i>Omicron_BF.11_spike/1-1268</i>         | C T E V P V A I H A D Q L T     | - -                                                 | P T W R V Y S T G S N V F Q T R A G C L I G A E Y V | - - - | -    |
| <i>Omicron_BF.7_spike/1-1268</i>          | C T E V P V A I H A D Q L T     | - -                                                 | P T W R V Y S T G S N V F Q T R A G C L I G A E Y V | - - - | -    |
| <i>Omicron_BN.1_spike/1-1270</i>          | C T E V P V A I H A D Q L T     | - -                                                 | P T W R V Y S T G S N V F Q T R A G C L I G A E Y V | - - - | -    |
| <i>Omicron_BQ.1_spike/1-1267</i>          | C T E V P V A I H A D Q L T     | - -                                                 | P T W R V Y S T G S N V F Q T R A G C L I G A E Y V | - - - | -    |
| <i>Omicron_BQ.1.1_spike/1-1267</i>        | C T E V P V A I H A D Q L T     | - -                                                 | P T W R V Y S T G S N V F Q T R A G C L I G A E Y V | - - - | -    |
| <i>Omicron_CH.1.1_spike/1-1270</i>        | C T E V P V A I H A D Q L T     | - -                                                 | P T W R V Y S T G S N V F Q T R A G C L I G A E Y V | - - - | -    |
| <i>Omicron_XBB_spike/1-1269</i>           | C T E V P V A I H A D Q L T     | - -                                                 | P T W R V Y S T G S N V F Q T R A G C L I G A E Y V | - - - | -    |
| <i>Omicron_XBB.1.5_spike/1-1269</i>       | C T E V P V A I H A D Q L T     | - -                                                 | P T W R V Y S T G S N V F Q T R A G C L I G A E Y V | - - - | -    |

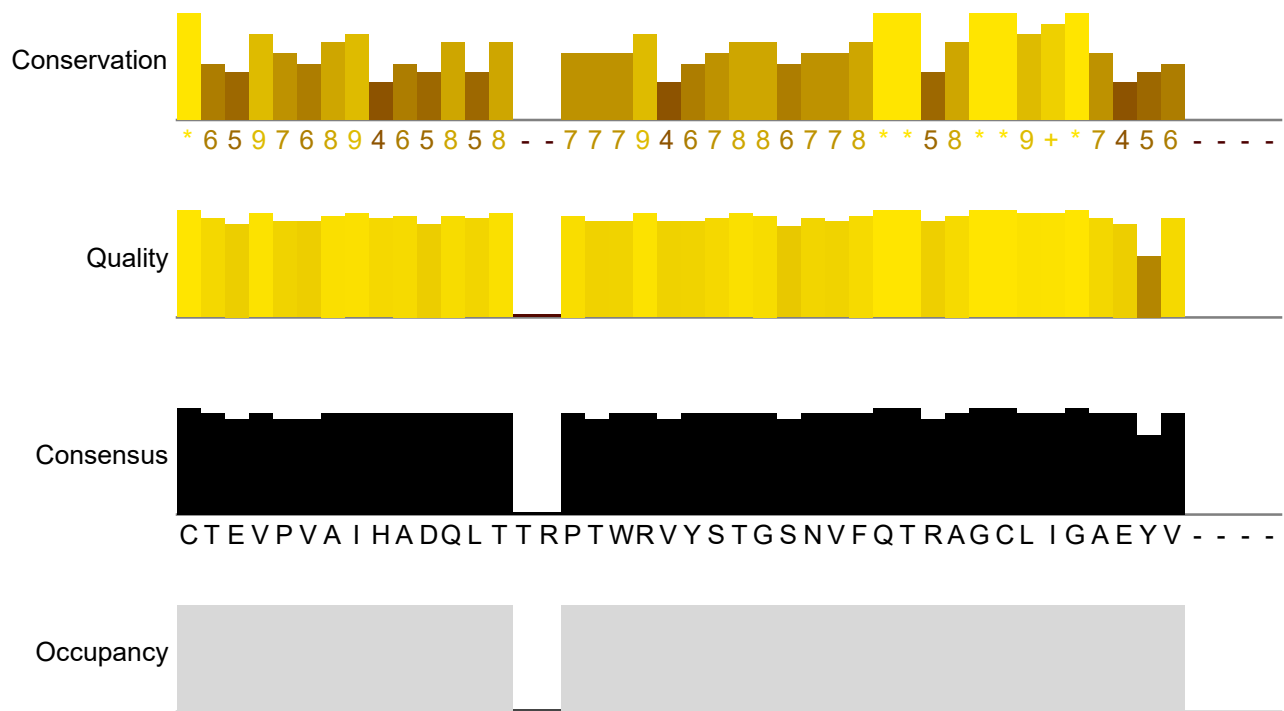









|                                           | 738C            | 748E     | 758S        | 768T  | 778T          |
|-------------------------------------------|-----------------|----------|-------------|-------|---------------|
| <b>SARS-CoV-2-Wuhan-Hu-1_spike/1-1273</b> | SVDCTMYICGDSTEC | SNLL     | LQYGSFCTQL  | NRAL  | TGIAVEQDKNTQE |
| <i>SARS-CoV-Urbani_spike/1-1255</i>       | SVDCNMYICGDSTEC | ANLL     | LQYGSFCTQL  | NRAL  | SGIAAEQDRNTRE |
| <i>MERS-CoV_spike/1-1353</i>              | TVDCKQYV        | CNGFQKCE | QLLREYGFCSK | INQAL | HGANLRQDDSVRN |
| <i>Alpha_B.1.1.7/1-1270</i>               | SVDCTMYICGDSTEC | SNLL     | LQYGSFCTQL  | NRAL  | TGIAVEQDKNTQE |
| <i>Beta_B.1.351/1-1270</i>                | SVDCTMYICGDSTEC | SNLL     | LQYGSFCTQL  | NRAL  | TGIAVEQDKNTQE |
| <i>Delta_B.1.617.2_spike/1-1271</i>       | SVDCTMYICGDSTEC | SNLL     | LQYGSFCTQL  | NRAL  | TGIAVEQDKNTQE |
| <i>Gamma_P.1_spike/1-1273</i>             | SVDCTMYICGDSTEC | SNLL     | LQYGSFCTQL  | NRAL  | TGIAVEQDKNTQE |
| <i>Omicron_B.1.1.529_spike/1-1273</i>     | SVDCTMYICGDSTEC | SNLL     | LQYGSFCTQL  | NRAL  | TGIAVEQDKNTQE |
| <i>Omicron_BA.1_spike/1-1270</i>          | SVDCTMYICGDSTEC | SNLL     | LQYGSFCTQL  | KRAL  | TGIAVEQDKNTQE |
| <i>Omicron_BA.1.1_spike/1-1270</i>        | SVDCTMYICGDSTEC | SNLL     | LQYGSFCTQL  | KRAL  | TGIAVEQDKNTQE |
| <i>Omicron_BA.2_spike/1-1270</i>          | SVDCTMYICGDSTEC | SNLL     | LQYGSFCTQL  | KRAL  | TGIAVEQDKNTQE |
| <i>Omicron_BA.2.12.1_spike/1-1270</i>     | SVDCTMYICGDSTEC | SNLL     | LQYGSFCTQL  | KRAL  | TGIAVEQDKNTQE |
| <i>Omicron_BA.2.75_spike/1-1269</i>       | SVDCTMYICGDSTEC | SNLL     | LQYGSFCTQL  | NRAL  | TGIAVEQDKNTQE |
| <i>Omicron_BA.2.75.2_spike/1-1270</i>     | SVDCTMYICGDSTEC | SNLL     | LQYGSFCTQL  | KRAL  | TGIAVEQDKNTQE |
| <i>Omicron_BA.4_spike/1-1268</i>          | SVDCTMYICGDSTEC | SNLL     | LQYGSFCTQL  | KRAL  | TGIAVEQDKNTQE |
| <i>Omicron_BA.4.6_spike/1-1268</i>        | SVDCTMYICGDSTEC | SNLL     | LQYGSFCTQL  | KRAL  | TGIAVEQDKNTQE |
| <i>Omicron_BA.5_spike/1-1268</i>          | SVDCTMYICGDSTEC | SNLL     | LQYGSFCTQL  | KRAL  | TGIAVEQDKNTQE |
| <i>Omicron_BA.5.2.6_spike/1-1268</i>      | SVDCTMYICGDSTEC | SNLL     | LQYGSFCTQL  | KRAL  | TGIAVEQDKNTQE |
| <i>Omicron_BF.11_spike/1-1268</i>         | SVDCTMYICGDSTEC | SNLL     | LQYGSFCTQL  | KRAL  | TGIAVEQDKNTQE |
| <i>Omicron_BF.7_spike/1-1268</i>          | SVDCTMYICGDSTEC | SNLL     | LQYGSFCTQL  | KRAL  | TGIAVEQDKNTQE |
| <i>Omicron_BN.1_spike/1-1270</i>          | SVDCTMYICGDSTEC | SNLL     | LQYGSFCTQL  | KRAL  | TGIAVEQDKNTQE |
| <i>Omicron_BQ.1_spike/1-1267</i>          | SVDCTMYICGDSTEC | SNLL     | LQYGSFCTQL  | KRAL  | TGIAVEQDKNTQE |
| <i>Omicron_BQ.1.1_spike/1-1267</i>        | SVDCTMYICGDSTEC | SNLL     | LQYGSFCTQL  | KRAL  | TGIAVEQDKNTQE |
| <i>Omicron_CH.1.1_spike/1-1270</i>        | SVDCTMYICGDSTEC | SNLL     | LQYGSFCTQL  | KRAL  | TGIAVEQDKNTQE |
| <i>Omicron_XBB_spike/1-1269</i>           | SVDCTMYICGDSTEC | SNLL     | LQYGSFCTQL  | KRAL  | TGIAVEQDKNTQE |
| <i>Omicron_XBB.1.5_spike/1-1269</i>       | SVDCTMYICGDSTEC | SNLL     | LQYGSFCTQL  | KRAL  | TGIAVEQDKNTQE |

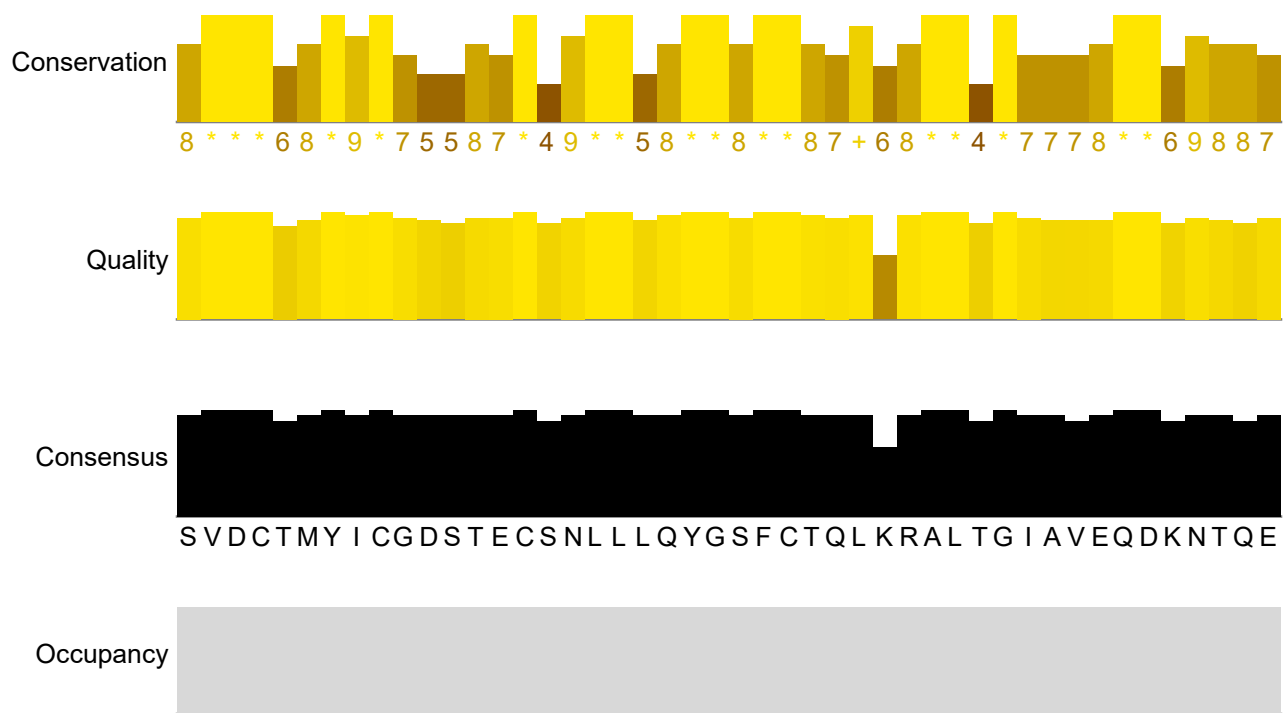



|                                           | 818I                                | 828L                    | 837Y                            | 844-                          | 852A |
|-------------------------------------------|-------------------------------------|-------------------------|---------------------------------|-------------------------------|------|
| <b>SARS-CoV-2-Wuhan-Hu-1_spike/1-1273</b> | F I E D L L F N K V T L A D A G F I | - K Q Y G D C L         | - - G D                         | - - I A A R D L I C A Q K F N |      |
| <i>SARS-CoV-Urbani_spike/1-1255</i>       | F I E D L L F N K V T L A D A G F M | - K Q Y G E C L         | - - G D                         | - - I N A R D L I C A Q K F N |      |
| <i>MERS-CoV_spike/1-1353</i>              | A I E D L L F D K V T I A D P G Y M | - Q G Y D D C M Q Q G P | - - - A S A R D L I C A Q Y V A |                               |      |
| <i>Alpha_B.1.1.7/1-1270</i>               | F I E D L L F N K V T L A D A G F I | - K Q Y G D C L         | - - G D                         | - - I A A R D L I C A Q K F N |      |
| <i>Beta_B.1.351/1-1270</i>                | F I E D L L F N K V T L A D A G F I | - K Q Y G D C L         | - - G D                         | - - I A A R D L I C A Q K F N |      |
| <i>Delta_B.1.617.2_spike/1-1271</i>       | F I E D L L F N K V T L A D A G F I | - K Q Y G D C L         | - - G D                         | - - I S A R D L I C A Q K F N |      |
| <i>Gamma_P.1_spike/1-1273</i>             | F I E D L L F N K V T L A D A G F I | - K Q Y G D C L         | - - G D                         | - - I A A R D L I C A Q K F N |      |
| <i>Omicron_B.1.1.529_spike/1-1273</i>     | F I E D L L F N K V T L A D A G F I | - K Q Y G D C L         | - - G D                         | - - I A A R D L I C A Q K F N |      |
| <i>Omicron_BA.1_spike/1-1270</i>          | F I E D L L F N K V T L A D A G F I | - K Q Y G D C L         | - - G D                         | - - I A A R D L I C S Q K F K |      |
| <i>Omicron_BA.1.1_spike/1-1270</i>        | F I E D L L F N K V T L A D A G F I | - K Q Y G D C L         | - - G D                         | - - I A A R D L I C A Q K F K |      |
| <i>Omicron_BA.2_spike/1-1270</i>          | F I E D L L F N K V T L A D A G F I | - K Q Y G D C L         | - - G D                         | - - I A A R D L I C A Q K F N |      |
| <i>Omicron_BA.2.12.1_spike/1-1270</i>     | F I E D L L F N K V T L A D A G F I | - K Q Y G D C L         | - - G D                         | - - I A A R D L I C A Q K F N |      |
| <i>Omicron_BA.2.75_spike/1-1269</i>       | F I E D L - F N K V T L A D A G F I | - K Q Y G D C L         | - - G D                         | - - I A A R D L I C A Q K F N |      |
| <i>Omicron_BA.2.75.2_spike/1-1270</i>     | F I E D L L F N K V T L A D A G F I | - K Q Y G D C L         | - - G D                         | - - I A A R D L I C A Q K F N |      |
| <i>Omicron_BA.4_spike/1-1268</i>          | F I E D L L F N K V T L A D A G F I | - K Q Y G D C L         | - - G D                         | - - I A A R D L I C A Q K F N |      |
| <i>Omicron_BA.4.6_spike/1-1268</i>        | F I E D L L F N K V T L A D A G F I | - K Q Y G D C L         | - - G D                         | - - I A A R D L I C A Q K F N |      |
| <i>Omicron_BA.5_spike/1-1268</i>          | F I E D L L F N K V T L A D A G F I | - K Q Y G D C L         | - - G D                         | - - I A A R D L I C A Q K F N |      |
| <i>Omicron_BA.5.2.6_spike/1-1268</i>      | F I E D L L F N K V T L A D A G F I | - K Q Y G D C L         | - - G D                         | - - I A A R D L I C A Q K F N |      |
| <i>Omicron_BF.11_spike/1-1268</i>         | F I E D L L F N K V T L A D A G F I | - K Q Y G D C L         | - - G D                         | - - I A A R D L I C A Q K F N |      |
| <i>Omicron_BF.7_spike/1-1268</i>          | F I E D L L F N K V T L A D A G F I | - K Q Y G D C L         | - - G D                         | - - I A A R D L I C A Q K F N |      |
| <i>Omicron_BN.1_spike/1-1270</i>          | F I E D L L F N K V T L A D A G F I | - K Q Y G D C L         | - - G D                         | - - I A A R D L I C A Q K F N |      |
| <i>Omicron_BQ.1_spike/1-1267</i>          | F I E D L L F N K V T L A D A G F I | - K Q Y G D C L         | - - G D                         | - - I A A R D L I C A Q K F N |      |
| <i>Omicron_BQ.1.1_spike/1-1267</i>        | F I E D L L F N K V T L A D A G F I | - K Q Y G D C L         | - - G D                         | - - I A A R D L I C A Q K F N |      |
| <i>Omicron_CH.1.1_spike/1-1270</i>        | F I E D L L F N K V T L A D A G F I | - K Q Y G D C L         | - - G D                         | - - I A A R D L I C A Q K F N |      |
| <i>Omicron_XBB_spike/1-1269</i>           | F I E D L L F N K V T L A D A G F I | - K Q Y G D C L         | - - G D                         | - - I A A R D L I C A Q K F N |      |
| <i>Omicron_XBB.1.5_spike/1-1269</i>       | F I E D L L F N K V T L A D A G F I | - K Q Y G D C L         | - - G D                         | - - I A A R D L I C A Q K F N |      |

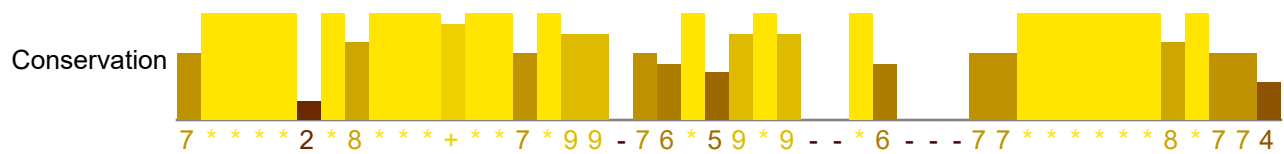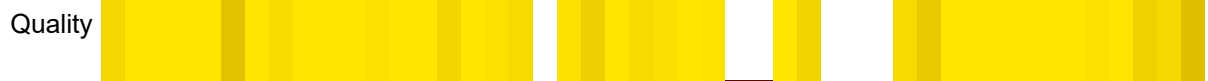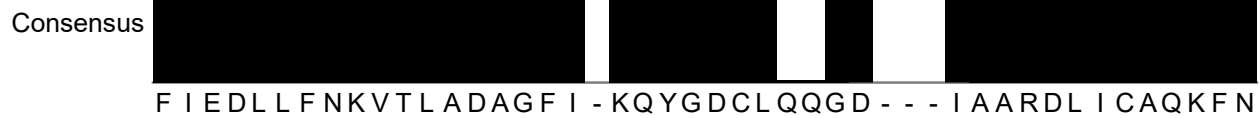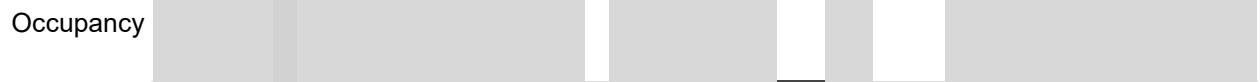

|--|--|--|--|--|--|--|--|--|--|--|--|--|--|--|--|--|--|--|--|--|--|--|--|--|--|--|--|--|--|--|--|--|--|--|--|--|--|--|--|--|--|--|--|--|--|--|--|--|--|--|--|--|--|--|--|--|--|--|--|--|--|--|--|--|--|--|--|--|--|--|--|--|--|--|--|--|--|--|--|--|--|--|--|--|--|--|--|--|--|--|--|--|--|--|--|--|--|--|--|--|--|--|--|--|--|--|--|--|--|--|--|--|--|--|--|--|--|--|--|--|--|--|--|--|--|--|--|--|--|--|--|--|--|--|--|--|--|--|--|--|--|--|--|--|--|--|--|--|--|--|--|--|--|--|--|--|--|--|--|--|--|--|--|--|--|--|--|--|--|--|--|--|--|--|--|--|--|--|--|--|--|--|--|--|--|--|--|--|--|--|--|--|--|--|--|--|--|--|--|--|--|--|--|--|--|--|--|--|--|--|--|--|--|--|--|--|--|--|--|--|--|--|--|--|--|--|--|--|--|--|--|--|--|--|--|--|--|--|--|--|--|--|--|--|--|--|--|--|--|--|--|--|--|--|--|--|--|--|--|--|--|--|--|--|--|--|--|--|--|--|--|--|--|--|--|--|--|--|--|--|--|--|--|--|--|--|--|--|--|--|--|--|--|--|--|--|--|--|--|--|--|--|--|--|--|--|--|--|--|--|--|--|--|--|--|--|--|--|--|--|--|--|--|--|--|--|--|--|--|--|--|--|--|--|--|--|--|--|--|--|--|--|--|--|--|--|--|--|--|--|--|--|--|--|--|--|--|--|--|--|--|--|--|--|--|--|--|--|--|--|--|--|--|--|--|--|--|--|--|--|--|--|--|--|--|--|--|--|--|--|--|--|--|--|--|--|--|--|--|--|--|--|--|--|--|--|--|--|--|--|--|--|--|--|--|--|--|--|--|--|--|--|--|--|--|--|--|--|--|--|--|--|--|--|--|--|--|--|--|--|--|--|--|--|--|--|--|--|--|--|--|--|--|--|--|--|--|--|--|--|--|--|--|--|--|--|--|--|--|--|--|--|--|--|--|--|--|--|--|--|--|--|--|--|--|--|--|--|--|--|--|--|--|--|--|--|--|--|--|--|--|--|--|--|--|--|--|--|--|--|--|--|--|--|--|--|--|--|--|--|--|--|--|--|--|--|--|--|--|--|--|--|--|--|--|--|--|--|--|--|--|--|--|--|--|--|--|--|--|--|--|--|--|--|--|--|--|--|--|--|--|--|--|--|--|--|--|--|--|--|--|--|--|--|--|--|--|--|--|--|--|--|--|--|--|--|--|--|--|--|--|--|--|--|--|--|--|--|--|--|--|--|--|--|--|--|--|--|--|--|--|--|--|--|--|--|--|--|--|--|--|--|--|--|--|--|--|--|--|--|--|--|--|--|--|--|--|--|--|--|--|--|--|--|--|--|--|--|--|--|--|--|--|--|--|--|--|--|--|--|--|--|--|--|--|--|--|--|--|--|--|--|--|--|--|--|--|--|--|--|--|--|--|--|--|--|--|--|--|--|--|--|--|--|--|--|--|--|--|--|--|--|--|--|--|--|--|--|--|--|--|--|--|--|--|--|--|--|--|--|--|--|--|--|--|--|--|--|--|--|--|--|--|--|--|--|--|--|--|--|--|--|--|--|--|--|--|--|--|--|--|--|--|--|--|--|--|--|--|--|--|--|--|--|--|--|--|--|--|--|--|--|--|--|--|--|--|--|--|--|--|--|--|--|--|--|--|--|--|--|--|--|--|--|--|--|--|--|--|--|--|--|--|--|--|--|--|--|--|--|--|--|--|--|--|--|--|--|--|--|--|--|--|--|--|--|--|--|--|--|--|--|--|--|--|--|--|--|--|--|--|--|--|--|--|--|--|--|--|--|--|--|--|--|--|--|--|--|--|--|--|--|--|--|--|--|--|--|--|--|--|--|--|--|--|--|--|--|--|--|--|--|--|--|--|--|--|--|--|--|--|--|--|--|--|--|--|--|--|--|--|--|--|--|--|--|--|--|--|--|--|--|--|--|--|--|--|--|--|--|--|--|--|--|--|--|--|--|--|--|--|--|--|--|--|--|--|--|--|--|--|--|--|--|--|--|--|--|--|--|--|--|--|--|--|--|--|--|--|--|--|--|--|--|--|--|--|--|--|--|--|--|--|--|--|--|--|--|--|--|--|--|--|--|--|--|--|--|--|--|--|--|--|--|--|--|--|--|--|--|--|--|--|--|--|--|--|--|--|--|--|--|--|--|--|--|--|--|--|--|--|--|--|--|--|--|--|--|--|--|--|--|--|--|--|--|--|--|--|--|--|--|--|--|--|--|--|--|--|--|--|--|--|--|--|--|--|--|--|--|--|--|--|--|--|--|--|--|--|--|--|--|--|--|--|--|--|--|--|--|--|--|--|--|--|--|--|--|--|--|--|--|--|--|--|--|--|--|--|--|--|--|--|--|--|--|--|--|--|--|--|--|--|--|--|--|--|--|--|--|--|--|--|--|--|--|--|--|--|--|--|--|--|--|--|--|--|--|--|--|--|--|--|--|--|--|--|--|--|--|--|--|--|--|--|--|--|--|--|--|--|--|--|--|--|--|--|--|--|--|--|--|--|--|--|--|--|--|--|--|--|--|--|--|--|--|--|--|--|--|--|--|--|--|--|--|--|--|--|--|--|--|--|--|--|--|--|--|--|--|--|--|--|--|--|--|--|--|--|--|--|--|--|--|--|--|--|--|--|--|--|--|--|--|--|--|--|--|--|--|--|--|--|--|--|--|--|--|--|--|--|--|--|--|--|--|--|--|--|--|--|--|--|--|--|--|--|--|--|--|--|--|--|--|--|--|--|--|--|--|--|--|--|--|--|--|--|--|--|--|--|--|--|--|--|--|--|--|--|--|--|--|--|--|--|--|--|--|--|--|--|--|--|--|--|--|--|--|--|--|--|--|--|--|--|--|--|--|--|--|--|--|--|--|--|--|--|--|--|--|--|--|--|--|--|--|--|--|--|--|--|--|--|--|--|--|--|--|--|--|--|--|--|--|--|--|--|--|--|--|--|--|--|--|--|--|--|

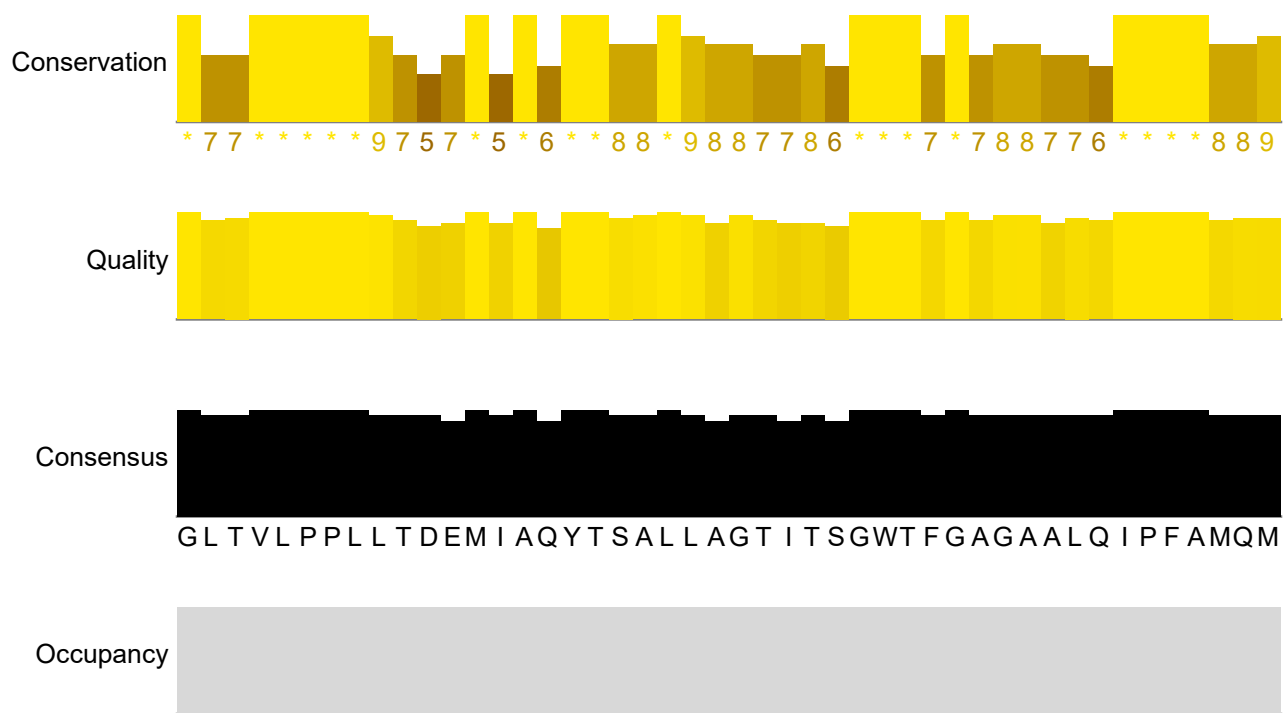

|                                           | 912T                                                              | 922L      | 932G      | 936-      |
|-------------------------------------------|-------------------------------------------------------------------|-----------|-----------|-----------|
| <b>SARS-CoV-2-Wuhan-Hu-1_spike/1-1273</b> | A Y R F N G I G V T Q N V L Y E N Q K L I A N Q F N S A I G K I Q | - - - - - | - - - - - | - - - - - |
| <i>SARS-CoV-Urbani_spike/1-1255</i>       | A Y R F N G I G V T Q N V L Y E N Q K Q I A N Q F N K A I S Q I Q | - - - - - | - - - - - | - - - - - |
| <i>MERS-CoV_spike/1-1353</i>              | F Y R L N G V G I T Q Q V L S E N Q K L I A N K F N Q A L G A M Q | - - - - - | - - - - - | - - - - - |
| <i>Alpha_B.1.1.7/1-1270</i>               | A Y R F N G I G V T Q N V L Y E N Q K L I A N Q F N S A I G K I Q | - - - - - | - - - - - | - - - - - |
| <i>Beta_B.1.351/1-1270</i>                | A Y R F N G I G V T Q N V L Y E N Q K L I A N Q F N S A I G K I Q | - - - - - | - - - - - | - - - - - |
| <i>Delta_B.1.617.2_spike/1-1271</i>       | A Y R F N G I G V T Q N V L Y E N Q K L I A N Q F N S A I G K I Q | - - - - - | - - - - - | - - - - - |
| <i>Gamma_P.1_spike/1-1273</i>             | A Y R F N G I G V T Q N V L Y E N Q K L I A N Q F N S A I G K I Q | - - - - - | - - - - - | - - - - - |
| <i>Omicron_B.1.1.529_spike/1-1273</i>     | A Y R F N G I G V T Q N V L Y E N Q K L I A N Q F N S A I G K I Q | - - - - - | - - - - - | - - - - - |
| <i>Omicron_BA.1_spike/1-1270</i>          | A Y R F N G I G V T Q N V L Y E N Q K L I A N Q F N S A I G K I Q | - - - - - | - - - - - | - - - - - |
| <i>Omicron_BA.1.1_spike/1-1270</i>        | A Y R F N G I G V T Q N V L Y E N Q K L I A N Q F N S A I G K I Q | - - - - - | - - - - - | - - - - - |
| <i>Omicron_BA.2_spike/1-1270</i>          | A Y R F N G I G V T Q N V L Y E N Q K L I A N Q F N S A I G K I Q | - - - - - | - - - - - | - - - - - |
| <i>Omicron_BA.2.12.1_spike/1-1270</i>     | A Y R F N G I G V T Q N V L Y E N Q K L I A N Q F N S A I G K I Q | - - - - - | - - - - - | - - - - - |
| <i>Omicron_BA.2.75_spike/1-1269</i>       | A Y R F N G I G V T Q N V L Y E N Q K L I A N Q F N S A I G K I Q | - - - - - | - - - - - | - - - - - |
| <i>Omicron_BA.2.75.2_spike/1-1270</i>     | A Y R F N G I G V T Q N V L Y E N Q K L I A N Q F N S A I G K I Q | - - - - - | - - - - - | - - - - - |
| <i>Omicron_BA.4_spike/1-1268</i>          | A Y R F N G I G V T Q N V L Y E N Q K L I A N Q F N S A I G K I Q | - - - - - | - - - - - | - - - - - |
| <i>Omicron_BA.4.6_spike/1-1268</i>        | A Y R F N G I G V T Q N V L Y E N Q K L I A N Q F N S A I G K I Q | - - - - - | - - - - - | - - - - - |
| <i>Omicron_BA.5_spike/1-1268</i>          | A Y R F N G I G V T Q N V L Y E N Q K L I A N Q F N S A I G K I Q | - - - - - | - - - - - | - - - - - |
| <i>Omicron_BA.5.2.6_spike/1-1268</i>      | A Y R F N G I G V T Q N V L Y E N Q K L I A N Q F N S A I G K I Q | - - - - - | - - - - - | - - - - - |
| <i>Omicron_BF.11_spike/1-1268</i>         | A Y R F N G I G V T Q N V L Y E N Q K L I A N Q F N S A I G K I Q | - - - - - | - - - - - | - - - - - |
| <i>Omicron_BF.7_spike/1-1268</i>          | A Y R F N G I G V T Q N V L Y E N Q K L I A N Q F N S A I G K I Q | - - - - - | - - - - - | - - - - - |
| <i>Omicron_BN.1_spike/1-1270</i>          | A Y R F N G I G V T Q N V L Y E N Q K L I A N Q F N S A I G K I Q | - - - - - | - - - - - | - - - - - |
| <i>Omicron_BQ.1_spike/1-1267</i>          | A Y R F N G I G V T Q N V L Y E N Q K L I A N Q F N S A I G K I Q | - - - - - | - - - - - | - - - - - |
| <i>Omicron_BQ.1.1_spike/1-1267</i>        | A Y R F N G I G V T Q N V L Y E N Q K L I A N Q F N S A I G K I Q | - - - - - | - - - - - | - - - - - |
| <i>Omicron_CH.1.1_spike/1-1270</i>        | A Y R F N G I G V T Q N V L Y E N Q K L I A N Q F N S A I G K I Q | - - - - - | - - - - - | - - - - - |
| <i>Omicron_XBB_spike/1-1269</i>           | A Y R F N G I G V T Q N V L Y E N Q K L I A N Q F N S A I G K I Q | - - - - - | - - - - - | - - - - - |
| <i>Omicron_XBB.1.5_spike/1-1269</i>       | A Y R F N G I G V T Q N V L Y E N Q K L I A N Q F N S A I G K I Q | - - - - - | - - - - - | - - - - - |

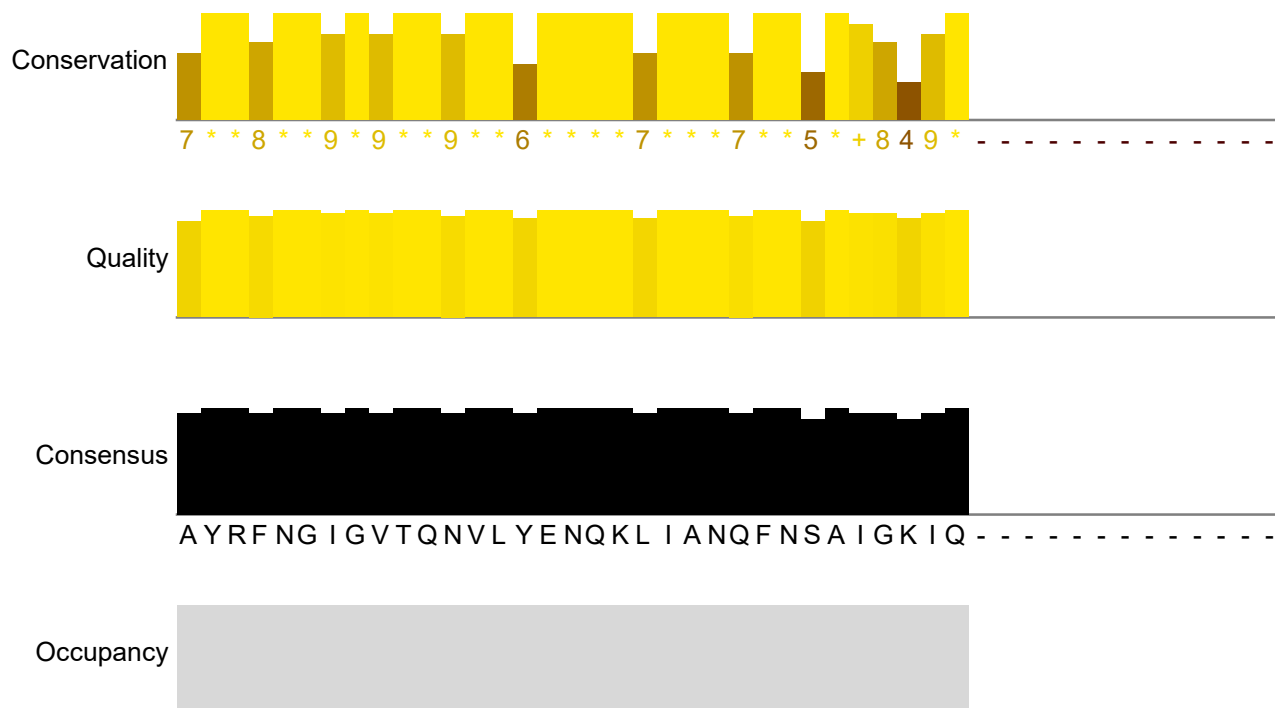

|                                           |   | 938L |   | 948L |   | 958A |   | 968S |   | 978N |   |   |   |   |   |   |   |   |   |   |   |   |   |   |   |   |   |   |   |   |   |   |   |   |   |   |   |   |   |   |   |   |   |   |   |   |
|-------------------------------------------|---|------|---|------|---|------|---|------|---|------|---|---|---|---|---|---|---|---|---|---|---|---|---|---|---|---|---|---|---|---|---|---|---|---|---|---|---|---|---|---|---|---|---|---|---|---|
| <b>SARS-CoV-2-Wuhan-Hu-1_spike/1-1273</b> | - | DSL  | S | S    | T | A    | S | A    | L | G    | K | L | Q | D | V | V | N | Q | N | A | Q | A | L | N | T | L | V | K | Q | L | S | S | N | F | G | A | I | S | S | V | L | N | D | I |   |   |
| <i>SARS-CoV-Urbani_spike/1-1255</i>       | - | ESL  | T | T    | T | S    | T | A    | L | G    | K | L | Q | D | V | V | N | Q | N | A | Q | A | L | N | T | L | V | K | Q | L | S | S | N | F | G | A | I | S | S | V | L | N | D | I |   |   |
| <i>MERS-CoV_spike/1-1353</i>              | - | T    | G | F    | T | T    | T | N    | E | A    | F | Q | K | V | Q | D | A | V | N | N | N | A | Q | A | L | S | K | L | A | S | E | L | S | N | T | F | G | A | I | S | A | S | I | G | D | I |
| <i>Alpha_B.1.1.7/1-1270</i>               | - | DSL  | S | S    | T | A    | S | A    | L | G    | K | L | Q | D | V | V | N | Q | N | A | Q | A | L | N | T | L | V | K | Q | L | S | S | N | F | G | A | I | S | S | V | L | N | D | I |   |   |
| <i>Beta_B.1.351/1-1270</i>                | - | DSL  | S | S    | T | A    | S | A    | L | G    | K | L | Q | D | V | V | N | Q | N | A | Q | A | L | N | T | L | V | K | Q | L | S | S | N | F | G | A | I | S | S | V | L | N | D | I |   |   |
| <i>Delta_B.1.617.2_spike/1-1271</i>       | - | DSL  | S | S    | T | A    | S | A    | L | G    | K | L | Q | N | V | V | N | Q | N | A | Q | A | L | N | T | L | V | K | Q | L | S | S | N | F | G | A | I | S | S | V | L | N | D | I |   |   |
| <i>Gamma_P.1_spike/1-1273</i>             | - | DSL  | S | S    | T | A    | S | A    | L | G    | K | L | Q | D | V | V | N | Q | N | A | Q | A | L | N | T | L | V | K | Q | L | S | S | N | F | G | A | I | S | S | V | L | N | D | I |   |   |
| <i>Omicron_B.1.1.529_spike/1-1273</i>     | - | DSL  | S | S    | T | A    | S | A    | L | G    | K | L | Q | D | V | V | N | H | N | A | Q | A | L | N | T | L | V | K | Q | L | S | S | K | F | G | A | I | S | S | V | L | N | D | I |   |   |
| <i>Omicron_BA.1_spike/1-1270</i>          | - | DSL  | S | S    | T | A    | S | A    | L | G    | K | L | Q | D | V | V | N | H | N | A | Q | A | L | N | T | L | V | K | Q | L | S | S | K | F | G | A | I | S | S | V | L | N | D | I |   |   |
| <i>Omicron_BA.1.1_spike/1-1270</i>        | - | DSL  | S | S    | T | A    | S | A    | L | G    | K | L | Q | D | V | V | N | H | N | A | Q | A | L | N | T | L | V | K | Q | L | S | S | K | F | G | A | I | S | S | V | L | N | D | I |   |   |
| <i>Omicron_BA.2_spike/1-1270</i>          | - | DSL  | S | S    | T | A    | S | A    | L | G    | K | L | Q | D | V | V | N | H | N | A | Q | A | L | N | T | L | V | K | Q | L | S | S | K | F | G | A | I | S | S | V | L | N | D | I |   |   |
| <i>Omicron_BA.2.12.1_spike/1-1270</i>     | - | DSL  | S | S    | T | A    | S | A    | L | G    | K | L | Q | D | V | V | N | H | N | A | Q | A | L | N | T | L | V | K | Q | L | S | S | K | F | G | A | I | S | S | V | L | N | D | I |   |   |
| <i>Omicron_BA.2.75_spike/1-1269</i>       | - | DSL  | S | S    | T | A    | S | A    | L | G    | K | L | Q | D | V | V | N | H | N | A | Q | A | L | N | T | L | V | K | Q | L | S | S | K | F | G | A | I | S | S | V | L | N | D | I |   |   |
| <i>Omicron_BA.2.75.2_spike/1-1270</i>     | - | DSL  | S | S    | T | A    | S | A    | L | G    | K | L | Q | D | V | V | N | H | N | A | Q | A | L | N | T | L | V | K | Q | L | S | S | K | F | G | A | I | S | S | V | L | N | D | I |   |   |
| <i>Omicron_BA.4_spike/1-1268</i>          | - | DSL  | S | S    | T | A    | S | A    | L | G    | K | L | Q | D | V | V | N | H | N | A | Q | A | L | N | T | L | V | K | Q | L | S | S | K | F | G | A | I | S | S | V | L | N | D | I |   |   |
| <i>Omicron_BA.4.6_spike/1-1268</i>        | - | DSL  | S | S    | T | A    | S | A    | L | G    | K | L | Q | D | V | V | N | H | N | A | Q | A | L | N | T | L | V | K | Q | L | S | S | K | F | G | A | I | S | S | V | L | N | D | I |   |   |
| <i>Omicron_BA.5_spike/1-1268</i>          | - | DSL  | S | S    | T | A    | S | A    | L | G    | K | L | Q | D | V | V | N | H | N | A | Q | A | L | N | T | L | V | K | Q | L | S | S | K | F | G | A | I | S | S | V | L | N | D | I |   |   |
| <i>Omicron_BA.5.2.6_spike/1-1268</i>      | - | DSL  | S | S    | T | A    | S | A    | L | G    | K | L | Q | D | V | V | N | H | N | A | Q | A | L | N | T | L | V | K | Q | L | S | S | K | F | G | A | I | S | S | V | L | N | D | I |   |   |
| <i>Omicron_BF.11_spike/1-1268</i>         | - | DSL  | S | S    | T | A    | S | A    | L | G    | K | L | Q | D | V | V | N | H | N | A | Q | A | L | N | T | L | V | K | Q | L | S | S | K | F | G | A | I | S | S | V | L | N | D | I |   |   |
| <i>Omicron_BF.7_spike/1-1268</i>          | - | DSL  | S | S    | T | A    | S | A    | L | G    | K | L | Q | D | V | V | N | H | N | A | Q | A | L | N | T | L | V | K | Q | L | S | S | K | F | G | A | I | S | S | V | L | N | D | I |   |   |
| <i>Omicron_BN.1_spike/1-1270</i>          | - | DSL  | S | S    | T | A    | S | A    | L | G    | K | L | Q | D | V | V | N | H | N | A | Q | A | L | N | T | L | V | K | Q | L | S | S | K | F | G | A | I | S | S | V | L | N | D | I |   |   |
| <i>Omicron_BQ.1_spike/1-1267</i>          | - | DSL  | S | S    | T | A    | S | A    | L | G    | K | L | Q | D | V | V | N | H | N | A | Q | A | L | N | T | L | V | K | Q | L | S | S | K | F | G | A | I | S | S | V | L | N | D | I |   |   |
| <i>Omicron_BQ.1.1_spike/1-1267</i>        | - | DSL  | S | S    | T | A    | S | A    | L | G    | K | L | Q | D | V | V | N | H | N | A | Q | A | L | N | T | L | V | K | Q | L | S | S | K | F | G | A | I | S | S | V | L | N | D | I |   |   |
| <i>Omicron_CH.1.1_spike/1-1270</i>        | - | DSL  | S | S    | T | A    | S | A    | L | G    | K | L | Q | D | V | V | N | H | N | A | Q | A | L | N | T | L | V | K | Q | L | S | S | K | F | G | A | I | S | S | V | L | N | D | I |   |   |
| <i>Omicron_XBB_spike/1-1269</i>           | - | DSL  | S | S    | T | A    | S | A    | L | G    | K | L | Q | D | V | V | N | H | N | A | Q | A | L | N | T | L | V | K | Q | L | S | S | K | F | G | A | I | S | S | V | L | N | D | I |   |   |
| <i>Omicron_XBB.1.5_spike/1-1269</i>       | - | DSL  | S | S    | T | A    | S | A    | L | G    | K | L | Q | D | V | V | N | H | N | A | Q | A | L | N | T | L | V | K | Q | L | S | S | K | F | G | A | I | S | S | V | L | N | D | I |   |   |

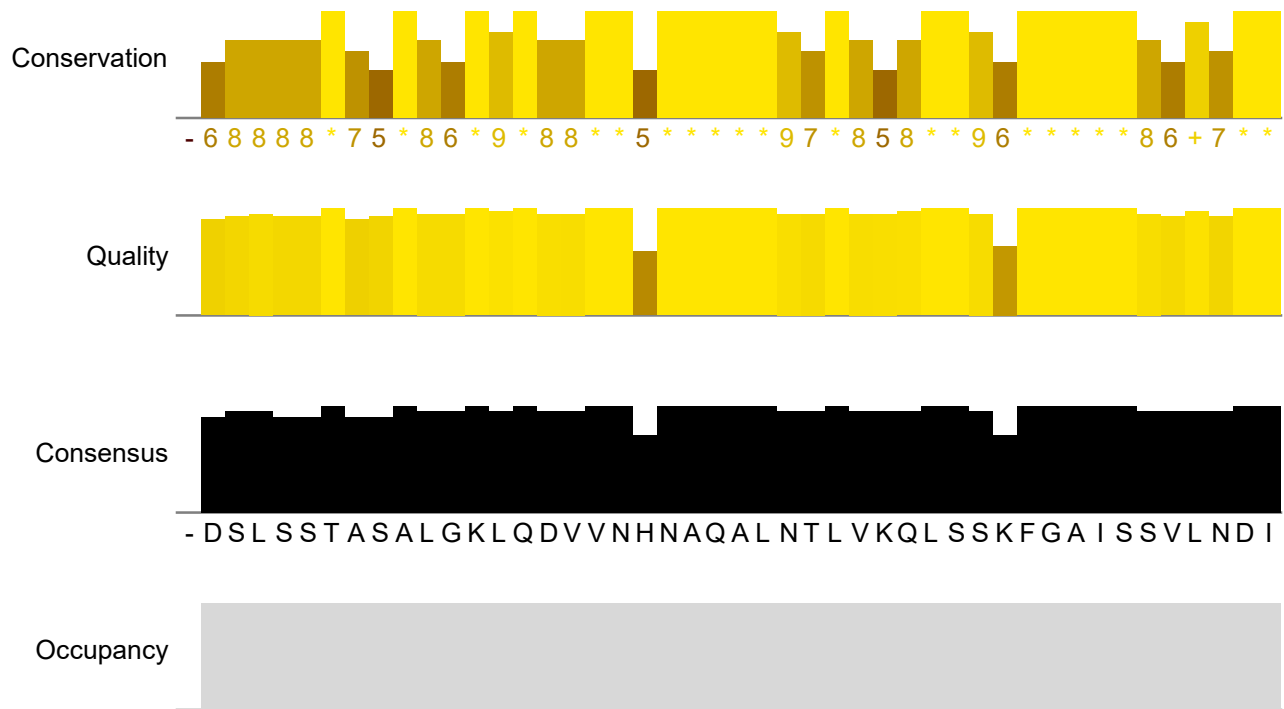



|                                           |   | 988E | 998T | 1008V | 1018I |   |   |   |   |   |   |   |   |   |   |   |   |   |   |   |   |   |   |   |   |   |   |   |   |   |   |   |   |   |   |   |   |   |   |   |   |   |   |   |   |   |
|-------------------------------------------|---|------|------|-------|-------|---|---|---|---|---|---|---|---|---|---|---|---|---|---|---|---|---|---|---|---|---|---|---|---|---|---|---|---|---|---|---|---|---|---|---|---|---|---|---|---|---|
| <b>SARS-CoV-2-Wuhan-Hu-1_spike/1-1273</b> | L | S    | R    | L     | D     | K | V | E | A | E | V | Q | I | D | R | L | I | T | G | R | L | Q | S | L | Q | T | Y | V | T | Q | Q | L | I | R | A | A | E | I | R | A | S | A | N | L | A | A |
| <i>SARS-CoV-Urbani_spike/1-1255</i>       | L | S    | R    | L     | D     | K | V | E | A | E | V | Q | I | D | R | L | I | T | G | R | L | Q | S | L | Q | T | Y | V | T | Q | Q | L | I | R | A | A | E | I | R | A | S | A | N | L | A | A |
| <i>MERS-CoV_spike/1-1353</i>              | I | Q    | R    | L     | D     | V | L | E | Q | D | A | Q | I | D | R | L | I | N | G | R | L | T | T | L | N | A | F | V | A | Q | Q | L | V | R | S | E | S | A | A | L | S | A | Q | L | A | K |
| <i>Alpha_B.1.1.7/1-1270</i>               | L | A    | R    | L     | D     | K | V | E | A | E | V | Q | I | D | R | L | I | T | G | R | L | Q | S | L | Q | T | Y | V | T | Q | Q | L | I | R | A | A | E | I | R | A | S | A | N | L | A | A |
| <i>Beta_B.1.351/1-1270</i>                | L | S    | R    | L     | D     | K | V | E | A | E | V | Q | I | D | R | L | I | T | G | R | L | Q | S | L | Q | T | Y | V | T | Q | Q | L | I | R | A | A | E | I | R | A | S | A | N | L | A | A |
| <i>Delta_B.1.617.2_spike/1-1271</i>       | L | S    | R    | L     | D     | K | V | E | A | E | V | Q | I | D | R | L | I | T | G | R | L | Q | S | L | Q | T | Y | V | T | Q | Q | L | I | R | A | A | E | I | R | A | S | A | N | L | A | A |
| <i>Gamma_P.1_spike/1-1273</i>             | L | S    | R    | L     | D     | K | V | E | A | E | V | Q | I | D | R | L | I | T | G | R | L | Q | S | L | Q | T | Y | V | T | Q | Q | L | I | R | A | A | E | I | R | A | S | A | N | L | A | A |
| <i>Omicron_B.1.1.529_spike/1-1273</i>     | L | S    | R    | L     | D     | K | V | E | A | E | V | Q | I | D | R | L | I | T | G | R | L | Q | S | L | Q | T | Y | V | T | Q | Q | L | I | R | A | A | E | I | R | A | S | A | N | L | A | A |
| <i>Omicron_BA.1_spike/1-1270</i>          | F | S    | R    | L     | D     | K | V | E | A | E | V | Q | I | D | R | L | I | T | G | R | L | Q | S | L | Q | T | Y | V | T | Q | Q | L | I | R | A | A | E | I | R | A | S | A | N | L | A | A |
| <i>Omicron_BA.1.1_spike/1-1270</i>        | F | S    | R    | L     | D     | K | V | E | A | E | V | Q | I | D | R | L | I | T | G | R | L | Q | S | L | Q | T | Y | V | T | Q | Q | L | I | R | A | A | E | I | R | A | S | A | N | L | A | A |
| <i>Omicron_BA.2_spike/1-1270</i>          | L | S    | R    | L     | D     | K | V | E | A | E | V | Q | I | D | R | L | I | T | G | R | L | Q | S | L | Q | T | Y | V | T | Q | Q | L | I | R | A | A | E | I | R | A | S | A | N | L | A | A |
| <i>Omicron_BA.2.12.1_spike/1-1270</i>     | L | S    | R    | L     | D     | K | V | E | A | E | V | Q | I | D | R | L | I | T | G | R | L | Q | S | L | Q | T | Y | V | T | Q | Q | L | I | R | A | A | E | I | R | A | S | A | N | L | A | A |
| <i>Omicron_BA.2.75_spike/1-1269</i>       | L | S    | R    | L     | D     | K | V | E | A | E | V | Q | I | D | R | L | I | T | G | R | L | Q | S | L | Q | T | Y | V | T | Q | Q | L | I | R | A | A | E | I | R | A | S | A | N | L | A | A |
| <i>Omicron_BA.2.75.2_spike/1-1270</i>     | L | S    | R    | L     | D     | K | V | E | A | E | V | Q | I | D | R | L | I | T | G | R | L | Q | S | L | Q | T | Y | V | T | Q | Q | L | I | R | A | A | E | I | R | A | S | A | N | L | A | A |
| <i>Omicron_BA.4_spike/1-1268</i>          | L | S    | R    | L     | D     | K | V | E | A | E | V | Q | I | D | R | L | I | T | G | R | L | Q | S | L | Q | T | Y | V | T | Q | Q | L | I | R | A | A | E | I | R | A | S | A | N | L | A | A |
| <i>Omicron_BA.4.6_spike/1-1268</i>        | L | S    | R    | L     | D     | K | V | E | A | E | V | Q | I | D | R | L | I | T | G | R | L | Q | S | L | Q | T | Y | V | T | Q | Q | L | I | R | A | A | E | I | R | A | S | A | N | L | A | A |
| <i>Omicron_BA.5_spike/1-1268</i>          | L | S    | R    | L     | D     | K | V | E | A | E | V | Q | I | D | R | L | I | T | G | R | L | Q | S | L | Q | T | Y | V | T | Q | Q | L | I | R | A | A | E | I | R | A | S | A | N | L | A | A |
| <i>Omicron_BA.5.2.6_spike/1-1268</i>      | L | S    | R    | L     | D     | K | V | E | A | E | V | Q | I | D | R | L | I | T | G | R | L | Q | S | L | Q | T | Y | V | T | Q | Q | L | I | R | A | A | E | I | R | A | S | A | N | L | A | A |
| <i>Omicron_BF.11_spike/1-1268</i>         | L | S    | R    | L     | D     | K | V | E | A | E | V | Q | I | D | R | L | I | T | G | R | L | Q | S | L | Q | T | Y | V | T | Q | Q | L | I | R | A | A | E | I | R | A | S | A | N | L | A | A |
| <i>Omicron_BF.7_spike/1-1268</i>          | L | S    | R    | L     | D     | K | V | E | A | E | V | Q | I | D | R | L | I | T | G | R | L | Q | S | L | Q | T | Y | V | T | Q | Q | L | I | R | A | A | E | I | R | A | S | A | N | L | A | A |
| <i>Omicron_BN.1_spike/1-1270</i>          | L | S    | R    | L     | D     | K | V | E | A | E | V | Q | I | D | R | L | I | T | G | R | L | Q | S | L | Q | T | Y | V | T | Q | Q | L | I | R | A | A | E | I | R | A | S | A | N | L | A | A |
| <i>Omicron_BQ.1_spike/1-1267</i>          | L | S    | R    | L     | D     | K | V | E | A | E | V | Q | I | D | R | L | I | T | G | R | L | Q | S | L | Q | T | Y | V | T | Q | Q | L | I | R | A | A | E | I | R | A | S | A | N | L | A | A |
| <i>Omicron_BQ.1.1_spike/1-1267</i>        | L | S    | R    | L     | D     | K | V | E | A | E | V | Q | I | D | R | L | I | T | G | R | L | Q | S | L | Q | T | Y | V | T | Q | Q | L | I | R | A | A | E | I | R | A | S | A | N | L | A | A |
| <i>Omicron_CH.1.1_spike/1-1270</i>        | L | S    | R    | L     | D     | K | V | E | A | E | V | Q | I | D | R | L | I | T | G | R | L | Q | S | L | Q | T | Y | V | T | Q | Q | L | I | R | A | A | E | I | R | A | S | A | N | L | A | A |
| <i>Omicron_XBB_spike/1-1269</i>           | L | S    | R    | L     | D     | K | V | E | A | E | V | Q | I | D | R | L | I | T | G | R | L | Q | S | L | Q | T | Y | V | T | Q | Q | L | I | R | A | A | E | I | R | A | S | A | N | L | A | A |
| <i>Omicron_XBB.1.5_spike/1-1269</i>       | L | S    | R    | L     | D     | K | V | E | A | E | V | Q | I | D | R | L | I | T | G | R | L | Q | S | L | Q | T | Y | V | T | Q | Q | L | I | R | A | A | E | I | R | A | S | A | N | L | A | A |

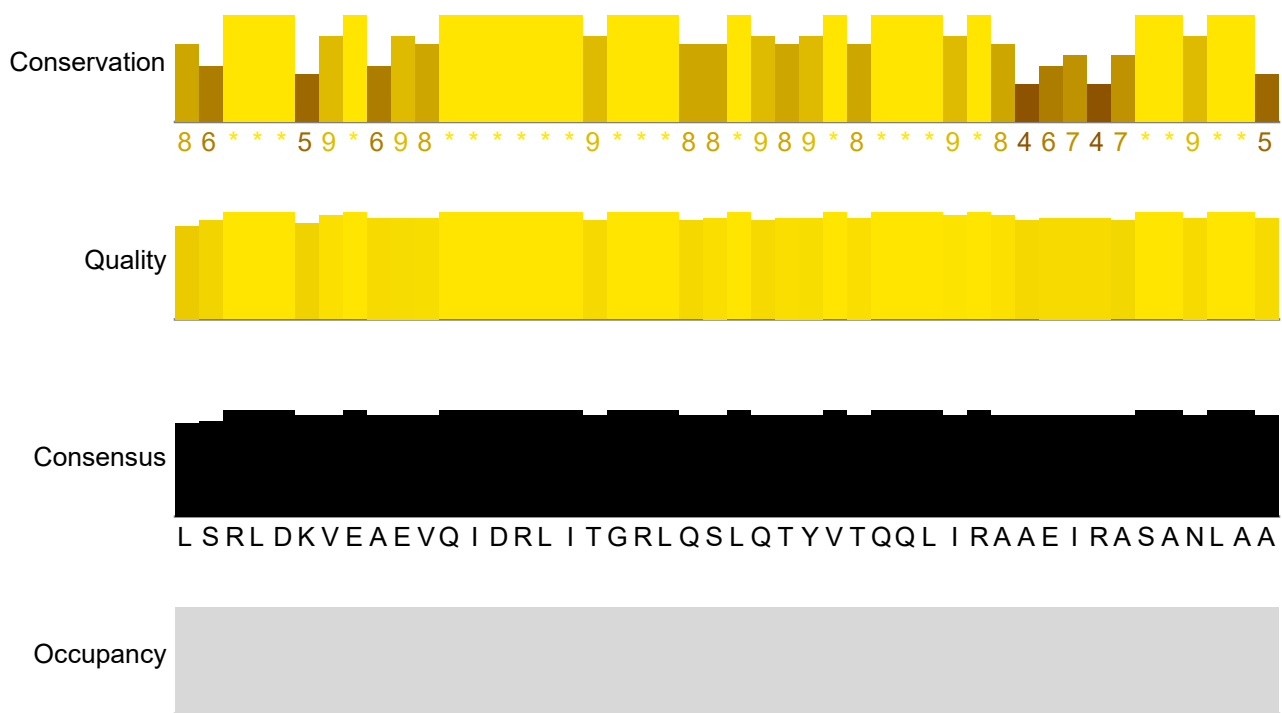



|                                           | 1028K | 1038K | 1048H | 1058H | 1068V |   |   |   |   |   |   |   |   |   |   |   |   |   |   |   |   |   |   |   |   |   |   |   |   |   |   |   |   |   |   |   |   |   |   |   |   |   |   |   |   |   |
|-------------------------------------------|-------|-------|-------|-------|-------|---|---|---|---|---|---|---|---|---|---|---|---|---|---|---|---|---|---|---|---|---|---|---|---|---|---|---|---|---|---|---|---|---|---|---|---|---|---|---|---|---|
| <b>SARS-CoV-2-Wuhan-Hu-1_spike/1-1273</b> | T     | K     | M     | S     | E     | C | V | L | G | Q | S | K | R | V | D | F | C | G | K | G | Y | H | L | M | S | F | P | Q | S | A | P | H | G | V | V | F | L | H | V | T | Y | V | P | A | Q | E |
| <i>SARS-CoV-Urbani_spike/1-1255</i>       | T     | K     | M     | S     | E     | C | V | L | G | Q | S | K | R | V | D | F | C | G | K | G | Y | H | L | M | S | F | P | Q | A | A | P | H | G | V | V | F | L | H | V | T | Y | V | P | S | Q | E |
| <i>MERS-CoV_spike/1-1353</i>              | D     | K     | V     | N     | E     | C | V | K | A | Q | S | K | R | S | G | F | C | G | Q | G | T | H | I | V | S | F | V | V | N | A | P | N | G | L | Y | F | M | H | V | G | Y | Y | P | S | N | H |
| <i>Alpha_B.1.1.7/1-1270</i>               | T     | K     | M     | S     | E     | C | V | L | G | Q | S | K | R | V | D | F | C | G | K | G | Y | H | L | M | S | F | P | Q | S | A | P | H | G | V | V | F | L | H | V | T | Y | V | P | A | Q | E |
| <i>Beta_B.1.351/1-1270</i>                | T     | K     | M     | S     | E     | C | V | L | G | Q | S | K | R | V | D | F | C | G | K | G | Y | H | L | M | S | F | P | Q | S | A | P | H | G | V | V | F | L | H | V | T | Y | V | P | A | Q | E |
| <i>Delta_B.1.617.2_spike/1-1271</i>       | T     | K     | M     | S     | E     | C | V | L | G | Q | S | K | R | V | D | F | C | G | K | G | Y | H | L | M | S | F | P | Q | S | A | P | H | G | V | V | F | L | H | V | T | Y | V | P | A | Q | E |
| <i>Gamma_P.1_spike/1-1273</i>             | I     | K     | M     | S     | E     | C | V | L | G | Q | S | K | R | V | D | F | C | G | K | G | Y | H | L | M | S | F | P | Q | S | A | P | H | G | V | V | F | L | H | V | T | Y | V | P | A | Q | E |
| <i>Omicron_B.1.1.529_spike/1-1273</i>     | T     | K     | M     | S     | E     | C | V | L | G | Q | S | K | R | V | D | F | C | G | K | G | Y | H | L | M | S | F | P | Q | S | A | P | H | G | V | V | F | L | H | V | T | Y | V | P | A | Q | E |
| <i>Omicron_BA.1_spike/1-1270</i>          | T     | K     | M     | S     | E     | C | V | L | G | Q | S | K | R | V | D | F | C | G | K | G | Y | H | L | M | S | F | P | Q | S | A | P | H | G | V | V | F | L | H | V | T | Y | V | P | A | Q | E |
| <i>Omicron_BA.1.1_spike/1-1270</i>        | T     | K     | M     | S     | E     | C | V | L | G | Q | S | K | R | V | D | F | C | G | K | G | Y | H | L | M | S | F | P | Q | S | A | P | H | G | V | V | F | L | H | V | T | Y | V | P | A | Q | E |
| <i>Omicron_BA.2_spike/1-1270</i>          | T     | K     | M     | S     | E     | C | V | L | G | Q | S | K | R | V | D | F | C | G | K | G | Y | H | L | M | S | F | P | Q | S | A | P | H | G | V | V | F | L | H | V | T | Y | V | P | A | Q | E |
| <i>Omicron_BA.2.12.1_spike/1-1270</i>     | T     | K     | M     | S     | E     | C | V | L | G | Q | S | K | R | V | D | F | C | G | K | G | Y | H | L | M | S | F | P | Q | S | A | P | H | G | V | V | F | L | H | V | T | Y | V | P | A | Q | E |
| <i>Omicron_BA.2.75_spike/1-1269</i>       | T     | K     | M     | S     | E     | C | V | L | G | Q | S | K | R | V | D | F | C | G | K | G | Y | H | L | M | S | F | P | Q | S | A | P | H | G | V | V | F | L | H | V | T | Y | V | P | A | Q | E |
| <i>Omicron_BA.2.75.2_spike/1-1270</i>     | T     | K     | M     | S     | E     | C | V | L | G | Q | S | K | R | V | D | F | C | G | K | G | Y | H | L | M | S | F | P | Q | S | A | P | H | G | V | V | F | L | H | V | T | Y | V | P | A | Q | E |
| <i>Omicron_BA.4_spike/1-1268</i>          | T     | K     | M     | S     | E     | C | V | L | G | Q | S | K | R | V | D | F | C | G | K | G | Y | H | L | M | S | F | P | Q | S | A | P | H | G | V | V | F | L | H | V | T | Y | V | P | A | Q | E |
| <i>Omicron_BA.4.6_spike/1-1268</i>        | T     | K     | M     | S     | E     | C | V | L | G | Q | S | K | R | V | D | F | C | G | K | G | Y | H | L | M | S | F | P | Q | S | A | P | H | G | V | V | F | L | H | V | T | Y | V | P | A | Q | E |
| <i>Omicron_BA.5_spike/1-1268</i>          | T     | K     | M     | S     | E     | C | V | L | G | Q | S | K | R | V | D | F | C | G | K | G | Y | H | L | M | S | F | P | Q | S | A | P | H | G | V | V | F | L | H | V | T | Y | V | P | A | Q | E |
| <i>Omicron_BA.5.2.6_spike/1-1268</i>      | T     | K     | M     | S     | E     | C | V | L | G | Q | S | K | R | V | D | F | C | G | K | G | Y | H | L | M | S | F | P | Q | S | A | P | H | G | V | V | F | L | H | V | T | Y | V | P | A | Q | E |
| <i>Omicron_BF.11_spike/1-1268</i>         | T     | K     | M     | S     | E     | C | V | L | G | Q | S | K | R | V | D | F | C | G | K | G | Y | H | L | M | S | F | P | Q | S | A | P | H | G | V | V | F | L | H | V | T | Y | V | P | A | Q | E |
| <i>Omicron_BF.7_spike/1-1268</i>          | T     | K     | M     | S     | E     | C | V | L | G | Q | S | K | R | V | D | F | C | G | K | G | Y | H | L | M | S | F | P | Q | S | A | P | H | G | V | V | F | L | H | V | T | Y | V | P | A | Q | E |
| <i>Omicron_BN.1_spike/1-1270</i>          | T     | K     | M     | S     | E     | C | V | L | G | Q | S | K | R | V | D | F | C | G | K | G | Y | H | L | M | S | F | P | Q | S | A | P | H | G | V | V | F | L | H | V | T | Y | V | P | A | Q | E |
| <i>Omicron_BQ.1_spike/1-1267</i>          | T     | K     | M     | S     | E     | C | V | L | G | Q | S | K | R | V | D | F | C | G | K | G | Y | H | L | M | S | F | P | Q | S | A | P | H | G | V | V | F | L | H | V | T | Y | V | P | A | Q | E |
| <i>Omicron_BQ.1.1_spike/1-1267</i>        | T     | K     | M     | S     | E     | C | V | L | G | Q | S | K | R | V | D | F | C | G | K | G | Y | H | L | M | S | F | P | Q | S | A | P | H | G | V | V | F | L | H | V | T | Y | V | P | A | Q | E |
| <i>Omicron_CH.1.1_spike/1-1270</i>        | T     | K     | M     | S     | E     | C | V | L | G | Q | S | K | R | V | D | F | C | G | K | G | Y | H | L | M | S | F | P | Q | S | A | P | H | G | V | V | F | L | H | V | T | Y | V | P | A | Q | E |
| <i>Omicron_XBB_spike/1-1269</i>           | T     | K     | M     | S     | E     | C | V | L | G | Q | S | K | R | V | D | F | C | G | K | G | Y | H | L | M | S | F | P | Q | S | A | P | H | G | V | V | F | L | H | V | T | Y | V | P | A | Q | E |
| <i>Omicron_XBB.1.5_spike/1-1269</i>       | T     | K     | M     | S     | E     | C | V | L | G | Q | S | K | R | V | D | F | C | G | K | G | Y | H | L | M | S | F | P | Q | S | A | P | H | G | V | V | F | L | H | V | T | Y | V | P | A | Q | E |

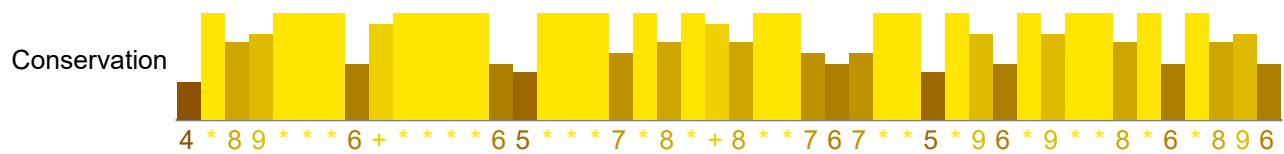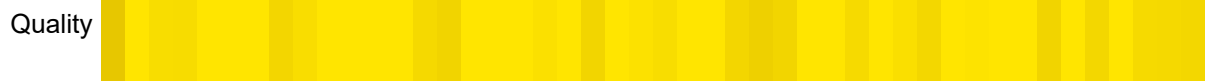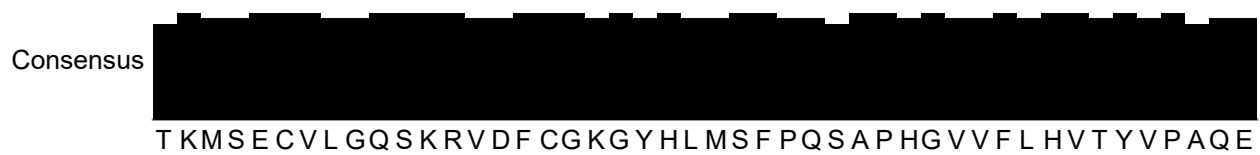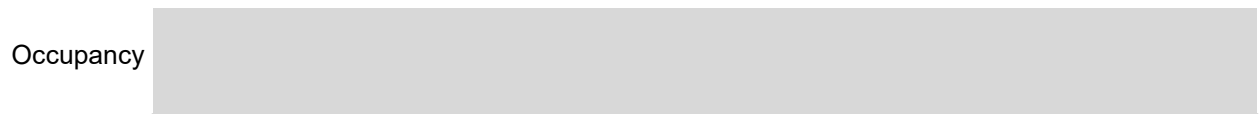

|                                           | 1078A            | 1087-  | 1093G           | 1099-        |
|-------------------------------------------|------------------|--------|-----------------|--------------|
| <b>SARS-CoV-2-Wuhan-Hu-1_spike/1-1273</b> | KNFTTTAPAI CHDGK | -A--   | HFPREGVFVSN     | -GTHWFTVQRN  |
| <i>SARS-CoV-Urbani_spike/1-1255</i>       | RNFTTTAPAI CHEGK | -A--   | YFPREGVVFVN     | -GTSWFI TQRN |
| <i>MERS-CoV_spike/1-1353</i>              | IEVVSAYGL CDAAN  | -PTNCI | APVNGYFIKTNNTRI | VDEWSYTGSS   |
| <i>Alpha_B.1.1.7/1-1270</i>               | KNFTTTAPAI CHDGK | -A--   | HFPREGVFVSN     | -GTHWFTVQRN  |
| <i>Beta_B.1.351/1-1270</i>                | KNFTTTAPAI CHDGK | -A--   | HFPREGVFVSN     | -GTHWFTVQRN  |
| <i>Delta_B.1.617.2_spike/1-1271</i>       | KNFTTTAPAI CHDGK | -A--   | HFPREGVFVSN     | -GTHWFTVQRN  |
| <i>Gamma_P.1_spike/1-1273</i>             | KNFTTTAPAI CHDGK | -A--   | HFPREGVFVSN     | -GTHWFTVQRN  |
| <i>Omicron_B.1.1.529_spike/1-1273</i>     | KNFTTTAPAI CHDGK | -A--   | HFPREGVFVSN     | -GTHWFTVQRN  |
| <i>Omicron_BA.1_spike/1-1270</i>          | KNFTTTAPAI CHDGK | -A--   | HFPREGVFVSN     | -GTHWFTVQRN  |
| <i>Omicron_BA.1.1_spike/1-1270</i>        | KNFTTTAPAI CHDGK | -A--   | HFPREGVFVSN     | -GTHWFTVQRN  |
| <i>Omicron_BA.2_spike/1-1270</i>          | KNFTTTAPAI CHDGK | -A--   | HFPREGVFVSN     | -GTHWFTVQRN  |
| <i>Omicron_BA.2.12.1_spike/1-1270</i>     | KNFTTTAPAI CHDGK | -A--   | HFPREGVFVSN     | -GTHWFTVQRN  |
| <i>Omicron_BA.2.75_spike/1-1269</i>       | KNFTTTAPAI CHDGK | -A--   | HFPREGVFVSN     | -GTHWFTVQRN  |
| <i>Omicron_BA.2.75.2_spike/1-1270</i>     | KNFTTTAPAI CHDGK | -A--   | HFPREGVFVSN     | -GTHWFTVQRN  |
| <i>Omicron_BA.4_spike/1-1268</i>          | KNFTTTAPAI CHDGK | -A--   | HFPREGVFVSN     | -GTHWFTVQRN  |
| <i>Omicron_BA.4.6_spike/1-1268</i>        | KNFTTTAPAI CHDGK | -A--   | HFPREGVFVSN     | -GTHWFTVQRN  |
| <i>Omicron_BA.5_spike/1-1268</i>          | KNFTTTAPAI CHDGK | -A--   | HFPREGVFVSN     | -GTHWFTVQRN  |
| <i>Omicron_BA.5.2.6_spike/1-1268</i>      | KNFTTTAPAI CHDGK | -A--   | HFPREGVFVSN     | -GTHWFTVQRN  |
| <i>Omicron_BF.11_spike/1-1268</i>         | KNFTTTAPAI CHDGK | -A--   | HFPREGVFVSN     | -GTHWFTVQRN  |
| <i>Omicron_BF.7_spike/1-1268</i>          | KNFTTTAPAI CHDGK | -A--   | HFPREGVFVSN     | -GTHWFTVQRN  |
| <i>Omicron_BN.1_spike/1-1270</i>          | KNFTTTAPAI CHDGK | -A--   | HFPREGVFVSN     | -GTHWFTVQRN  |
| <i>Omicron_BQ.1_spike/1-1267</i>          | KNFTTTAPAI CHDGK | -A--   | HFPREGVFVSN     | -GTHWFTVQRN  |
| <i>Omicron_BQ.1.1_spike/1-1267</i>        | KNFTTTAPAI CHDGK | -A--   | HFPREGVFVSN     | -GTHWFTVQRN  |
| <i>Omicron_CH.1.1_spike/1-1270</i>        | KNFTTTAPAI CHDGK | -A--   | HFPREGVFVSN     | -GTHWFTVQRN  |
| <i>Omicron_XBB_spike/1-1269</i>           | KNFTTTAPAI CHDGK | -A--   | HFPREGVFVSN     | -GTHWFTVQRN  |
| <i>Omicron_XBB.1.5_spike/1-1269</i>       | KNFTTTAPAI CHDGK | -A--   | HFPREGVFVSN     | -GTHWFTVQRN  |

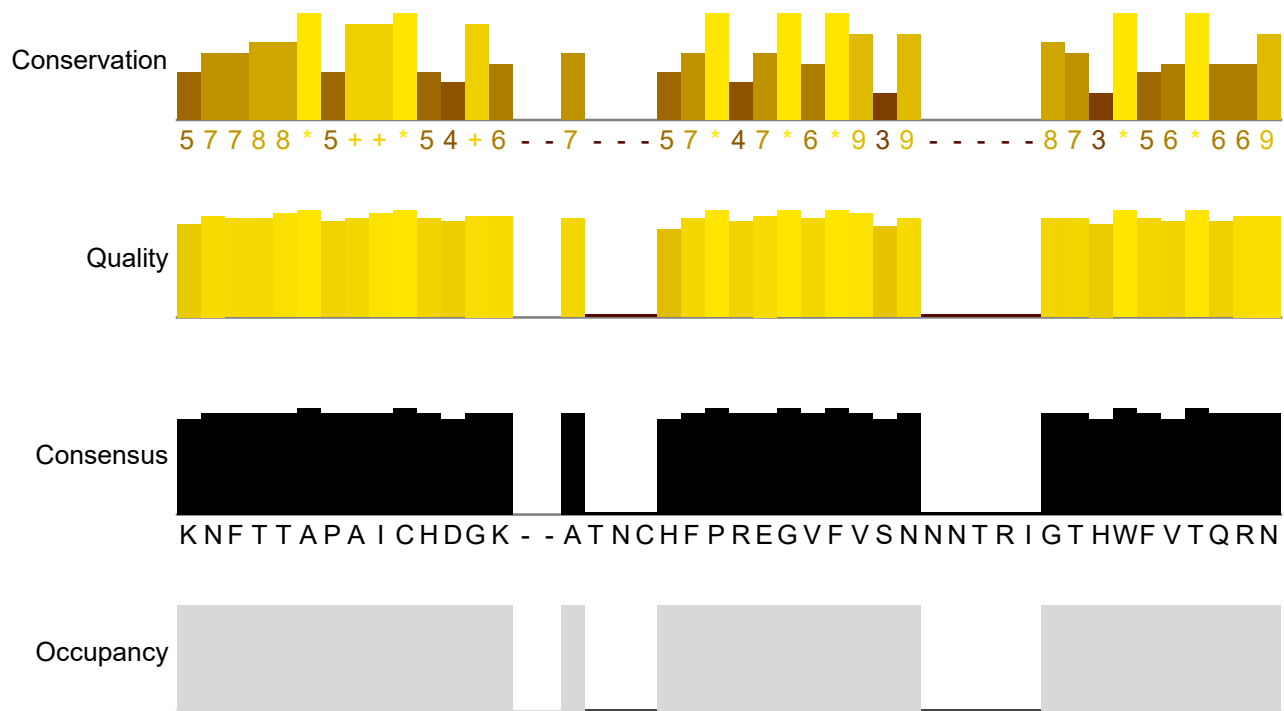

|                                           |                                                                                       | 1118D | 1128V | 1138Y | 1146D   |       |
|-------------------------------------------|---------------------------------------------------------------------------------------|-------|-------|-------|---------|-------|
| <b>SARS-CoV-2-Wuhan-Hu-1_spike/1-1273</b> | FYEPQ I I T T D N T F V S G N C D V V I G I V N N T V Y D P L Q                       |       |       |       | PELDSFK | - - - |
| <i>SARS-CoV-Urbani_spike/1-1255</i>       | F F S P Q I I T T D N T F V S G N C D V V I G I I N N T V Y D P L Q                   |       |       |       | PELDSFK | - - - |
| <i>MERS-CoV_spike/1-1353</i>              | F Y A P E P I T S L N T K Y V A P Q V T Y Q N - I S T N L P P P L L G N S T G I D F Q |       |       |       |         | - - - |
| <i>Alpha_B.1.1.7/1-1270</i>               | FYEPQ I I T T H N T F V S G N C D V V I G I V N N T V Y D P L Q                       |       |       |       | PELDSFK | - - - |
| <i>Beta_B.1.351/1-1270</i>                | FYEPQ I I T T D N T F V S G N C D V V I G I V N N T V Y D P L Q                       |       |       |       | PELDSFK | - - - |
| <i>Delta_B.1.617.2_spike/1-1271</i>       | FYEPQ I I T T D N T F V S G N C D V V I G I V N N T V Y D P L Q                       |       |       |       | PELDSFK | - - - |
| <i>Gamma_P.1_spike/1-1273</i>             | FYEPQ I I T T D N T F V S G N C D V V I G I V N N T V Y D P L Q                       |       |       |       | PELDSFK | - - - |
| <i>Omicron_B.1.1.529_spike/1-1273</i>     | FYEPQ I I T T D N T F V S G N C D V V I G I V N N T V Y D P L Q                       |       |       |       | PELDSFK | - - - |
| <i>Omicron_BA.1_spike/1-1270</i>          | FYEPQ I I T T D N T F V S G N C D V V I G I V N N T V Y D P L Q                       |       |       |       | PELDSFK | - - - |
| <i>Omicron_BA.1.1_spike/1-1270</i>        | FYEPQ I I T T D N T F V S G N C D V V I G I V N N T V Y D P L Q                       |       |       |       | PELDSFK | - - - |
| <i>Omicron_BA.2_spike/1-1270</i>          | FYEPQ I I T T D N T F V S G N C D V V I G I V N N T V Y D P L Q                       |       |       |       | PELDSFK | - - - |
| <i>Omicron_BA.2.12.1_spike/1-1270</i>     | FYEPQ I I T T D N T F V S G N C D V V I G I V N N T V Y D P L Q                       |       |       |       | PELDSFK | - - - |
| <i>Omicron_BA.2.75_spike/1-1269</i>       | FYEPQ I I T T D N T F V S G N C D V V I G I V N N T V Y D P L Q                       |       |       |       | PELDSFK | - - - |
| <i>Omicron_BA.2.75.2_spike/1-1270</i>     | FYEPQ I I T T D N T F V S G N C D V V I G I V N N T V Y D P L Q                       |       |       |       | PELDSFK | - - - |
| <i>Omicron_BA.4_spike/1-1268</i>          | FYEPQ I I T T D N T F V S G N C D V V I G I V N N T V Y D P L Q                       |       |       |       | PELDSFK | - - - |
| <i>Omicron_BA.4.6_spike/1-1268</i>        | FYEPQ I I T T D N T F V S G N C D V V I G I V N N T V Y D P L Q                       |       |       |       | PELDSFK | - - - |
| <i>Omicron_BA.5_spike/1-1268</i>          | FYEPQ I I T T D N T F V S G N C D V V I G I V N N T V Y D P L Q                       |       |       |       | PELDSFK | - - - |
| <i>Omicron_BA.5.2.6_spike/1-1268</i>      | FYEPQ I I T T D N T F V S G N C D V V I G I V N N T V Y D P L Q                       |       |       |       | PELDSFK | - - - |
| <i>Omicron_BF.11_spike/1-1268</i>         | FYEPQ I I T T D N T F V S G N C D V V I G I V N N T V Y D P L Q                       |       |       |       | PELDSFK | - - - |
| <i>Omicron_BF.7_spike/1-1268</i>          | FYEPQ I I T T D N T F V S G N C D V V I G I V N N T V Y D P L Q                       |       |       |       | PELDSFK | - - - |
| <i>Omicron_BN.1_spike/1-1270</i>          | FYEPQ I I T T D N T F V S G N C D V V I G I V N N T V Y D P L Q                       |       |       |       | PELDSFK | - - - |
| <i>Omicron_BQ.1_spike/1-1267</i>          | FYEPQ I I T T D N T F V S G N C D V V I G I V N N T V Y D P L Q                       |       |       |       | PELDSFK | - - - |
| <i>Omicron_BQ.1.1_spike/1-1267</i>        | FYEPQ I I T T D N T F V S G N C D V V I G I V N N T V Y D P L Q                       |       |       |       | PELDSFK | - - - |
| <i>Omicron_CH.1.1_spike/1-1270</i>        | FYEPQ I I T T D N T F V S G N C D V V I G I V N N T V Y D P L Q                       |       |       |       | PELDSFK | - - - |
| <i>Omicron_XBB_spike/1-1269</i>           | FYEPQ I I T T D N T F V S G N C D V V I G I V N N T V Y D P L Q                       |       |       |       | PELDSFK | - - - |
| <i>Omicron_XBB.1.5_spike/1-1269</i>       | FYEPQ I I T T D N T F V S G N C D V V I G I V N N T V Y D P L Q                       |       |       |       | PELDSFK | - - - |

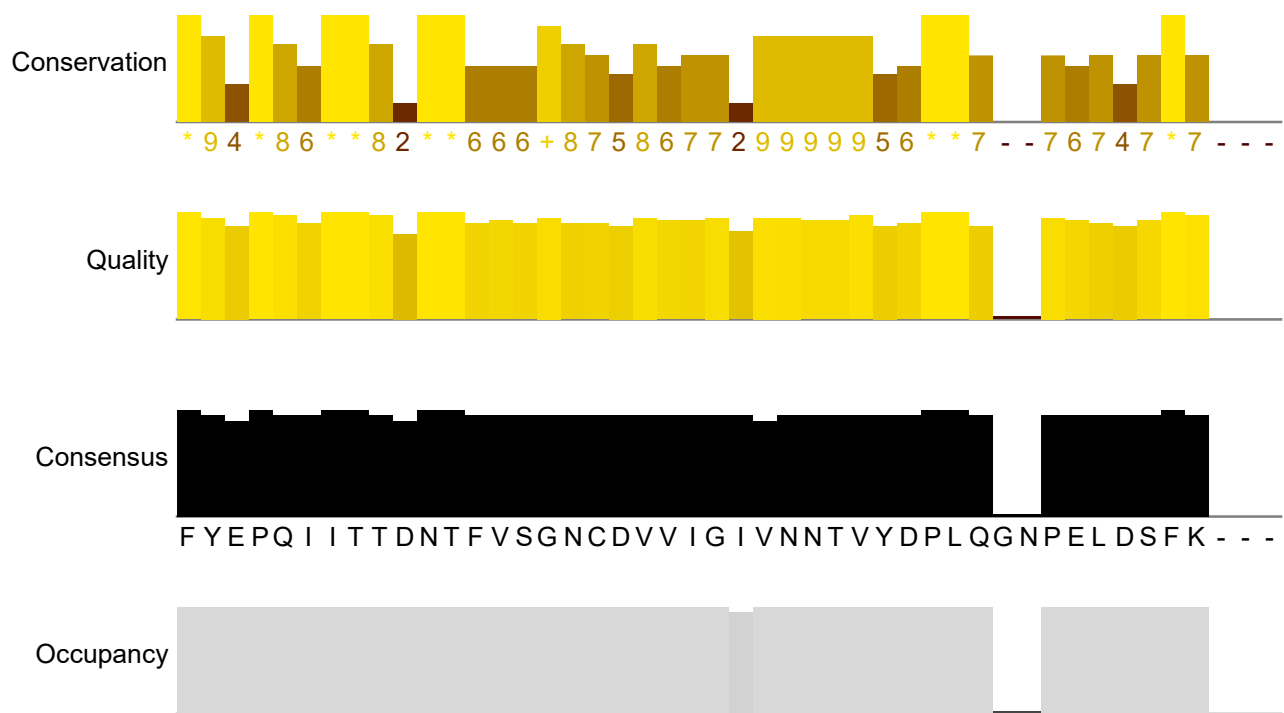



|                                           |           | 1188E | 1198I | 1208Q | 1218L |   |   |   |   |   |   |   |   |   |   |   |   |   |   |   |   |   |   |   |   |   |   |   |   |   |   |   |   |   |   |   |   |   |   |   |
|-------------------------------------------|-----------|-------|-------|-------|-------|---|---|---|---|---|---|---|---|---|---|---|---|---|---|---|---|---|---|---|---|---|---|---|---|---|---|---|---|---|---|---|---|---|---|---|
| <b>SARS-CoV-2-Wuhan-Hu-1_spike/1-1273</b> | - - - - - | E     | V     | A     | K     | N | L | N | E | S | L | I | D | L | Q | E | L | G | K | Y | E | Q | Y | I | K | W | P | W | Y | I | W | L | G | F | I | A | G | L | I | A |
| <i>SARS-CoV-Urbani_spike/1-1255</i>       | - - - - - | E     | V     | A     | K     | N | L | N | E | S | L | I | D | L | Q | E | L | G | K | Y | E | Q | Y | I | K | W | P | W | Y | V | W | L | G | F | I | A | G | L | I | A |
| <i>MERS-CoV_spike/1-1353</i>              | - - - - - | Q     | V     | V     | K     | A | L | N | E | S | Y | I | D | L | K | E | L | G | N | Y | T | Y | N | K | W | P | W | Y | I | W | L | G | F | I | A | G | L | V | A |   |
| <i>Alpha_B.1.1.7/1-1270</i>               | - - - - - | E     | V     | A     | N     | N | L | N | E | S | L | I | D | L | Q | E | L | G | K | Y | E | Q | Y | I | K | W | P | W | Y | I | W | L | G | F | I | A | G | L | I | A |
| <i>Beta_B.1.351/1-1270</i>                | - - - - - | E     | V     | A     | K     | N | L | N | E | S | L | I | D | L | Q | E | L | G | K | Y | E | Q | Y | I | K | W | P | W | Y | I | W | L | G | F | I | A | G | L | I | A |
| <i>Delta_B.1.617.2_spike/1-1271</i>       | - - - - - | E     | V     | A     | K     | N | L | N | E | S | L | I | D | L | Q | E | L | G | K | Y | E | Q | Y | I | K | W | P | W | Y | I | W | L | G | F | I | A | G | L | I | A |
| <i>Gamma_P.1_spike/1-1273</i>             | - - - - - | E     | V     | A     | K     | N | L | N | E | S | L | I | D | L | Q | E | L | G | K | Y | E | Q | Y | I | K | W | P | W | Y | I | W | L | G | F | I | A | G | L | I | A |
| <i>Omicron_B.1.1.529_spike/1-1273</i>     | - - - - - | E     | V     | A     | K     | N | L | N | E | S | L | I | D | L | Q | E | L | G | K | Y | E | Q | Y | I | K | W | P | W | Y | I | W | L | G | F | I | A | G | L | I | A |
| <i>Omicron_BA.1_spike/1-1270</i>          | - - - - - | E     | V     | A     | K     | N | L | N | E | S | L | I | D | L | Q | E | L | G | K | Y | E | Q | Y | I | K | W | P | W | Y | I | W | L | G | F | I | A | G | L | I | A |
| <i>Omicron_BA.1.1_spike/1-1270</i>        | - - - - - | E     | V     | A     | K     | N | L | N | E | S | L | I | D | L | Q | E | L | G | K | Y | E | Q | Y | I | K | W | P | W | Y | I | W | L | G | F | I | A | G | L | I | A |
| <i>Omicron_BA.2_spike/1-1270</i>          | - - - - - | E     | V     | A     | K     | N | L | N | E | S | L | I | D | L | Q | E | L | G | K | Y | E | Q | Y | I | K | W | P | W | Y | I | W | L | G | F | I | A | G | L | I | A |
| <i>Omicron_BA.2.12.1_spike/1-1270</i>     | - - - - - | E     | V     | A     | K     | N | L | N | E | S | L | I | D | L | Q | E | L | G | K | Y | E | Q | Y | I | K | W | P | W | Y | I | W | L | G | F | I | A | G | L | I | A |
| <i>Omicron_BA.2.75_spike/1-1269</i>       | - - - - - | E     | V     | A     | K     | N | L | N | E | S | L | I | D | L | Q | E | L | G | K | Y | E | Q | Y | I | K | W | P | W | Y | I | W | L | G | F | I | A | G | L | I | A |
| <i>Omicron_BA.2.75.2_spike/1-1270</i>     | - - - - - | E     | V     | A     | K     | N | L | N | E | S | L | I | N | L | Q | E | L | G | K | Y | E | Q | Y | I | K | W | P | W | Y | I | W | L | G | F | I | A | G | L | I | A |
| <i>Omicron_BA.4_spike/1-1268</i>          | - - - - - | E     | V     | A     | K     | N | L | N | E | S | L | I | D | L | Q | E | L | G | K | Y | E | Q | Y | I | K | W | P | W | Y | I | W | L | C | F | I | A | G | L | I | A |
| <i>Omicron_BA.4.6_spike/1-1268</i>        | - - - - - | E     | V     | A     | K     | N | L | N | E | S | L | I | D | L | Q | E | L | G | K | Y | E | Q | Y | I | K | W | P | W | Y | I | W | L | G | F | I | A | G | L | I | A |
| <i>Omicron_BA.5_spike/1-1268</i>          | - - - - - | E     | V     | A     | K     | N | L | N | E | S | L | I | D | L | Q | E | L | G | K | Y | E | Q | Y | I | K | W | P | W | Y | I | W | L | G | F | I | A | G | L | I | A |
| <i>Omicron_BA.5.2.6_spike/1-1268</i>      | - - - - - | E     | V     | A     | K     | N | L | N | E | S | L | I | D | L | Q | E | L | G | K | Y | E | Q | Y | I | K | W | P | W | Y | I | W | L | G | F | I | A | G | L | I | A |
| <i>Omicron_BF.11_spike/1-1268</i>         | - - - - - | E     | V     | A     | K     | N | L | N | E | S | L | I | D | L | Q | E | L | G | K | Y | E | Q | Y | I | K | W | P | W | Y | I | W | L | G | F | I | A | G | L | I | A |
| <i>Omicron_BF.7_spike/1-1268</i>          | - - - - - | E     | V     | A     | K     | N | L | N | E | S | L | I | D | L | Q | E | L | G | K | Y | E | Q | Y | I | K | W | P | W | Y | I | W | L | G | F | I | A | G | L | I | A |
| <i>Omicron_BN.1_spike/1-1270</i>          | - - - - - | E     | V     | A     | K     | N | L | N | E | S | L | I | D | L | Q | E | L | G | K | Y | E | Q | Y | I | K | W | P | W | Y | I | W | L | G | F | I | A | G | L | I | A |
| <i>Omicron_BQ.1_spike/1-1267</i>          | - - - - - | E     | V     | A     | K     | N | L | N | E | S | L | I | D | L | Q | E | L | G | K | Y | E | Q | Y | I | K | W | P | W | Y | I | W | L | G | F | I | A | G | L | I | A |
| <i>Omicron_BQ.1.1_spike/1-1267</i>        | - - - - - | E     | V     | A     | K     | N | L | N | E | S | L | I | D | L | Q | E | L | G | K | Y | E | Q | Y | I | K | W | P | W | Y | I | W | L | G | F | I | A | G | L | I | A |
| <i>Omicron_CH.1.1_spike/1-1270</i>        | - - - - - | E     | V     | A     | K     | N | L | N | E | S | L | I | D | L | Q | E | L | G | K | Y | E | Q | Y | I | K | W | P | W | Y | I | W | L | G | F | I | A | G | L | I | A |
| <i>Omicron_XBB_spike/1-1269</i>           | - - - - - | E     | V     | A     | K     | N | L | N | E | S | L | I | D | L | Q | E | L | G | K | Y | E | Q | Y | I | K | W | P | W | Y | I | W | L | G | F | I | A | G | L | I | A |
| <i>Omicron_XBB.1.5_spike/1-1269</i>       | - - - - - | E     | V     | A     | K     | N | L | N | E | S | L | I | D | L | Q | E | L | G | K | Y | E | Q | Y | I | K | W | P | W | Y | I | W | L | G | F | I | A | G | L | I | A |

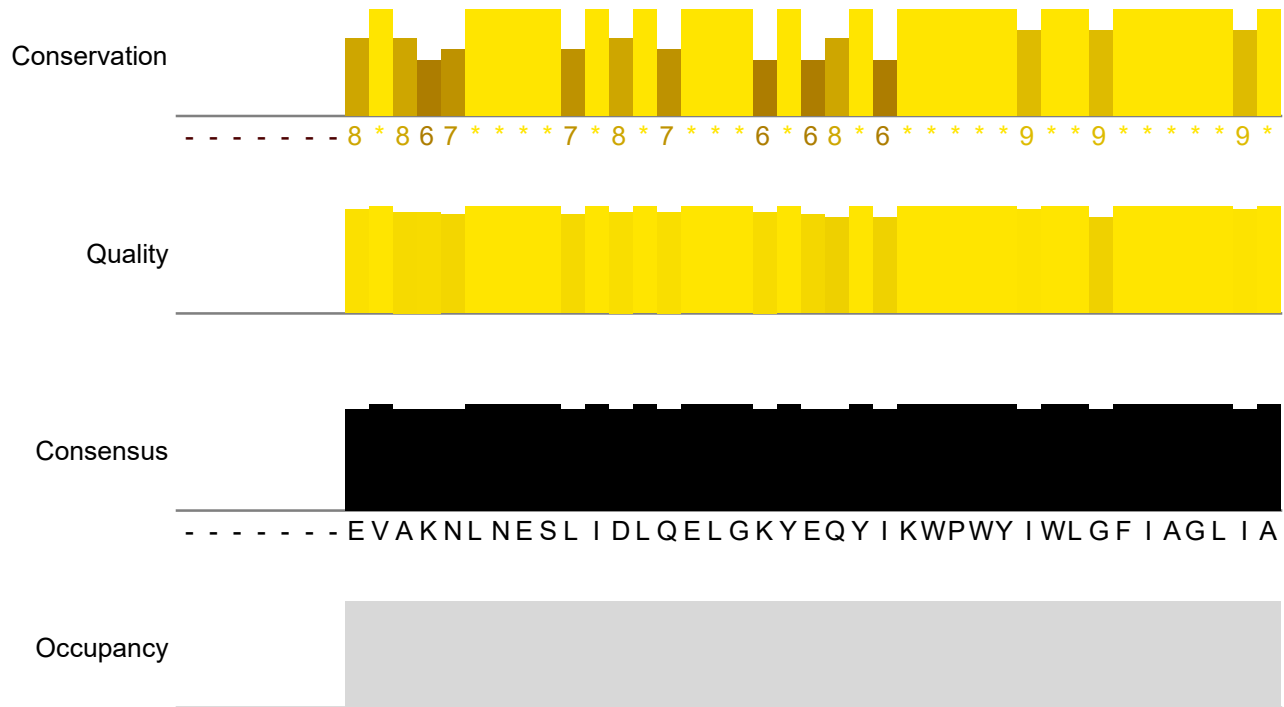

|                                           | 1228V                                     | 1238T     | 1248-                               | 1251G               | 1260D |
|-------------------------------------------|-------------------------------------------|-----------|-------------------------------------|---------------------|-------|
| <b>SARS-CoV-2-Wuhan-Hu-1_spike/1-1273</b> | I V M V T I M L C C M T S C C S C L K G C | - - - - - | C S C G S C C K                     | - F D E D D S E P V |       |
| <i>SARS-CoV-Urbani_spike/1-1255</i>       | I V M V T I L L C C M T S C C S C L K G A | - - - - - | C S C G S C C K                     | - F D E D D S E P V |       |
| <i>MERS-CoV_spike/1-1353</i>              | L A L C V F F I L C C T G C G T N C M G K | - - - - - | L K C N R C C D R Y E E Y D L E P H |                     |       |
| <i>Alpha_B.1.1.7/1-1270</i>               | I V M V T I M L C C M T S C C S C L K G C | - - - - - | C S C G S C C K                     | - F D E D D S E P V |       |
| <i>Beta_B.1.351/1-1270</i>                | I V M V T I M L C C M T S C C S C L K G C | - - - - - | C S C G S C C K                     | - F D E D D S E P V |       |
| <i>Delta_B.1.617.2_spike/1-1271</i>       | I V M V T I M L C C M T S C C S C L K G C | - - - - - | C S C G S C C K                     | - F D E D D S E P V |       |
| <i>Gamma_P.1_spike/1-1273</i>             | I V M V T I M L C C M T S C C S C L K G C | - - - - - | C S C G S C C K                     | - F D E D D S E P V |       |
| <i>Omicron_B.1.1.529_spike/1-1273</i>     | I V M V T I M L C C M T S C C S C L K G C | - - - - - | C S C G S C C K                     | - F D E D D S E P V |       |
| <i>Omicron_BA.1_spike/1-1270</i>          | I V M V T I M L C C M T S C C S C L K G C | - - - - - | C S C G S C C K                     | - F D E D D S E P V |       |
| <i>Omicron_BA.1.1_spike/1-1270</i>        | I V M V T I M L C C M T S C C S C L K G C | - - - - - | C S C G S C C K                     | - F D E D D S E P V |       |
| <i>Omicron_BA.2_spike/1-1270</i>          | I V M V T I M L C C M T S C C S C L K G C | - - - - - | C S C G S C C K                     | - F D E D D S E P V |       |
| <i>Omicron_BA.2.12.1_spike/1-1270</i>     | I V M V T I M L C C M T S C C S C L K G C | - - - - - | C S C G S C C K                     | - F D E D D S E P V |       |
| <i>Omicron_BA.2.75_spike/1-1269</i>       | I V M V T I M L C C M T S C C S C L K G C | - - - - - | C S C G S C C K                     | - F D E D D S E P V |       |
| <i>Omicron_BA.2.75.2_spike/1-1270</i>     | I V M V T I M L C C M T S C C S C L K G C | - - - - - | C S C G S C C K                     | - F D E D D S E P V |       |
| <i>Omicron_BA.4_spike/1-1268</i>          | I V M V T I M L C C M T S C C S C L K G C | - - - - - | C S C G S C C K                     | - F D E D D S E P V |       |
| <i>Omicron_BA.4.6_spike/1-1268</i>        | I V M V T I M L C C M T S C C S C L K G C | - - - - - | C S C G S C C K                     | - F D E D D S E P V |       |
| <i>Omicron_BA.5_spike/1-1268</i>          | I V M V T I M L C C M T S C C S C L K G C | - - - - - | C S C G S C C K                     | - F D E D D S E P V |       |
| <i>Omicron_BA.5.2.6_spike/1-1268</i>      | I V M V T I M L C C M T S C C S C L K G C | - - - - - | C S C G S C C K                     | - F D E D D S E P V |       |
| <i>Omicron_BF.11_spike/1-1268</i>         | I V M V T I M L C C M T S C C S C L K G C | - - - - - | C S C G S C C K                     | - F D E D D S E P V |       |
| <i>Omicron_BF.7_spike/1-1268</i>          | I V M V T I M L C C M T S C C S C L K G C | - - - - - | C S C G S C C K                     | - F D E D D S E P V |       |
| <i>Omicron_BN.1_spike/1-1270</i>          | I V M V T I M L C C M T S C C S C L K G C | - - - - - | C S C G S C C K                     | - F D E D D S E P V |       |
| <i>Omicron_BQ.1_spike/1-1267</i>          | I V M V T I M L C C M T S C C S C L K G C | - - - - - | C S C G S C C K                     | - F D E D D S E P V |       |
| <i>Omicron_BQ.1.1_spike/1-1267</i>        | I V M V T I M L C C M T S C C S C L K G S | - - - - - | C S C G S C C K                     | - F D E D D S E P V |       |
| <i>Omicron_CH.1.1_spike/1-1270</i>        | I V M V T I M L C C M T S C C S C L K G C | - - - - - | C S C G S C C K                     | - F D E D D S E P V |       |
| <i>Omicron_XBB_spike/1-1269</i>           | I V M V T I M L C C M T S C C S C L K G C | - - - - - | C S C G S C C K                     | - F D E D D S E P V |       |
| <i>Omicron_XBB.1.5_spike/1-1269</i>       | I V M V T I M L C C M T S C C S C L K G C | - - - - - | C S C G S C C K                     | - F D E D D S E P V |       |

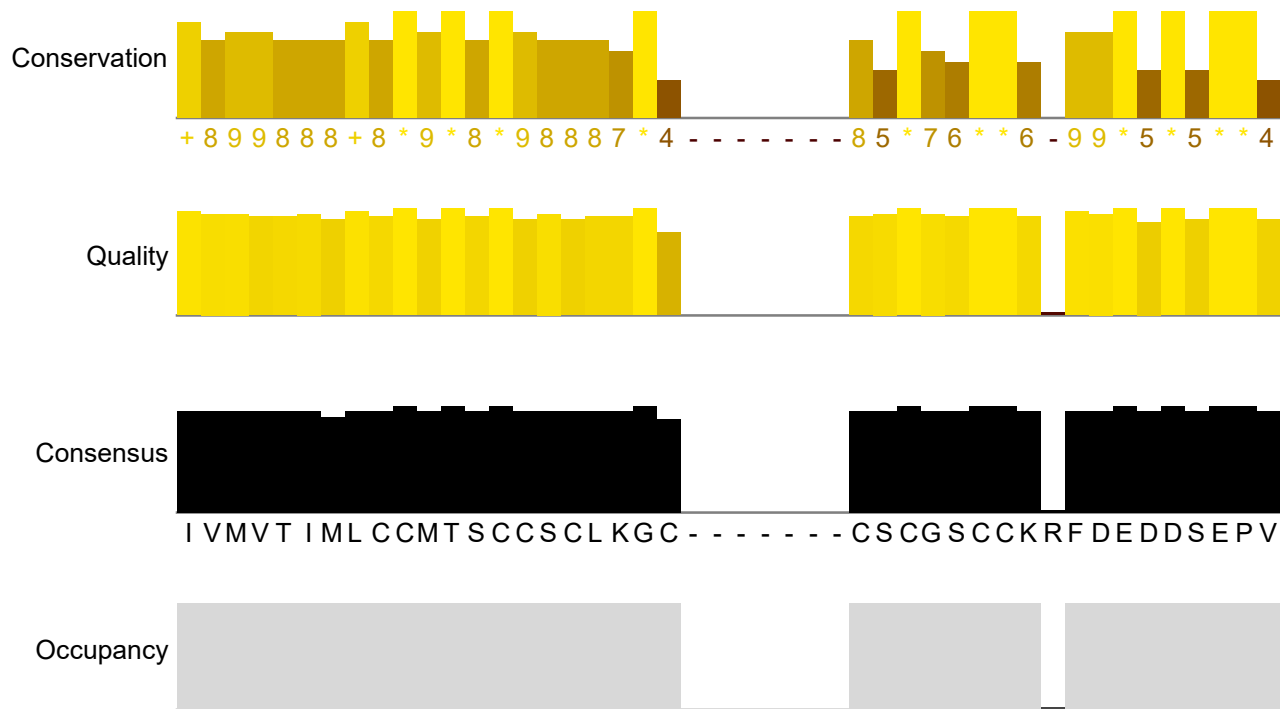

1270L

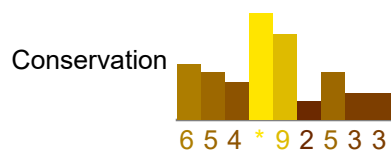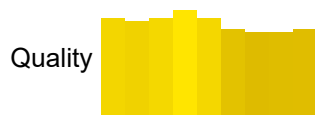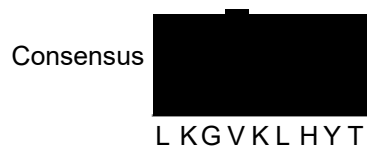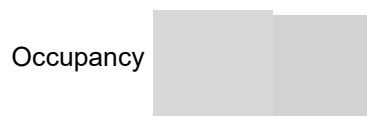

Supplement: Supplementary file 2 [file supplementary]
