# Supplementary material for: An Immunoinformatics Approach for Identifying and Designing Conserved Multi-Epitope Vaccines for Coronaviruses
Source: Preprints.org preprint supplement (doi:10.20944/preprints202409.0239.v1), 2024-09-03

|  |  |  |  |    |  |  |  |  |  |  |  |  |  |  |  |  |  |  |  |  |  |  |  |  |  |  |  |  |  |  |  |  |  |  |  |  |  |  |  |  |  |  |  |  |  |  |  |  |  |  |  |  |  |  |  |  |  |  |  |  |  |  |  |  |  |  |  |  |  |  |  |  |  |  |  |  |  |  |  |  |  |  |  |  |  |  |  |  |  |  |  |  |  |  |  |  |  |  |  |  |  |  |  |  |  |  |  |  |  |  |  |  |  |  |  |  |  |  |  |  |  |  |  |  |  |  |  |  |  |  |  |  |  |  |  |  |  |  |  |  |  |  |  |  |  |  |  |  |  |  |  |  |  |  |  |  |  |  |  |  |  |  |  |  |  |  |  |  |  |  |  |  |  |  |  |  |  |  |  |  |  |  |  |  |  |  |  |  |  |  |  |  |  |  |  |  |  |  |  |  |  |  |  |  |  |  |  |  |  |  |  |  |  |  |  |  |  |  |  |  |  |  |  |  |  |  |  |  |  |  |  |  |  |  |  |  |  |  |  |  |  |  |  |  |  |  |  |  |  |  |  |  |  |  |  |  |  |  |  |  |  |  |  |  |  |  |  |  |  |  |  |  |  |  |  |  |  |  |  |  |  |  |  |  |  |  |  |  |  |  |  |  |  |  |  |  |  |  |  |  |  |  |  |  |  |  |  |  |  |  |  |  |  |  |  |  |  |  |  |  |  |  |  |  |  |  |  |  |  |  |  |  |  |  |  |  |  |  |  |  |  |  |  |  |  |  |  |  |  |  |  |  |  |  |  |  |  |  |  |  |  |  |  |  |  |  |  |  |  |  |  |  |  |  |  |  |  |  |  |  |  |  |  |  |  |  |  |  |  |  |  |  |  |  |  |  |  |  |  |  |  |  |  |  |  |  |  |  |  |  |  |  |  |  |  |  |  |  |  |  |  |  |  |  |  |  |  |  |  |  |  |  |  |  |  |  |  |  |  |  |  |  |  |  |  |  |  |  |  |  |  |  |  |  |  |  |  |  |  |  |  |  |  |  |  |  |  |  |  |  |  |  |  |  |  |  |  |  |  |  |  |  |  |  |  |  |  |  |  |  |  |  |  |  |  |  |  |  |  |  |  |  |  |  |  |  |  |  |  |  |  |  |  |  |  |  |  |  |  |  |  |  |  |  |  |  |  |  |  |  |  |  |  |  |  |  |  |  |  |  |  |  |  |  |  |  |  |  |  |  |  |  |  |  |  |  |  |  |  |  |  |  |  |  |  |  |  |  |  |  |  |  |  |  |  |  |  |  |  |  |  |  |  |  |  |  |  |  |  |  |  |  |  |  |  |  |  |  |  |  |  |  |  |  |  |  |  |  |  |  |  |  |  |  |  |  |  |  |  |  |  |  |  |  |  |  |  |  |  |  |  |  |  |  |  |  |  |  |  |  |  |  |  |  |  |  |  |  |  |  |  |  |  |  |  |  |  |  |  |  |  |  |  |  |  |  |  |  |  |  |  |  |  |  |  |  |  |  |  |  |  |  |  |  |  |  |  |  |  |  |  |  |  |  |  |  |  |  |  |  |  |  |  |  |  |  |  |  |  |  |  |  |  |  |  |  |  |  |  |  |  |  |  |  |  |  |  |  |  |  |  |  |  |  |  |  |  |  |  |  |  |  |  |  |  |  |  |  |  |  |  |  |  |  |  |  |  |  |  |  |  |  |  |  |  |  |  |  |  |  |  |  |  |  |  |  |  |  |  |  |  |  |  |  |  |  |  |  |  |  |  |  |  |  |  |  |  |  |  |  |  |  |  |  |  |  |  |  |  |  |  |  |  |  |  |  |  |  |  |  |  |  |  |  |  |  |  |  |  |  |  |  |  |  |  |  |  |  |  |  |  |  |  |  |  |  |  |  |  |  |  |  |  |  |  |  |  |  |  |  |  |  |  |  |  |  |  |  |  |  |  |  |  |  |  |  |  |  |  |  |  |  |  |  |  |  |  |  |  |  |  |  |  |  |  |  |  |  |  |  |  |  |  |  |  |  |  |  |  |  |  |  |  |  |  |  |  |  |  |  |  |  |  |  |  |  |  |  |  |  |  |  |  |  |  |  |  |  |  |  |  |  |  |  |  |  |  |  |  |  |  |  |  |  |  |  |  |  |  |  |  |  |  |  |  |  |  |  |  |  |  |  |  |  |  |  |  |  |  |  |  |  |  |  |  |  |  |  |  |  |  |  |  |  |  |  |  |  |  |  |  |  |  |  |  |  |  |  |  |  |  |  |  |  |  |  |  |  |  |  |  |  |  |  |  |  |  |  |  |  |  |  |  |  |  |  |  |  |  |  |  |  |  |  |  |  |  |  |  |  |  |  |  |  |  |  |  |  |  |  |  |  |  |  |  |  |  |  |  |  |  |  |  |  |  |  |  |  |  |  |  |  |  |  |  |  |  |  |  |  |  |  |  |  |  |  |  |  |  |  |  |  |  |  |  |  |  |  |  |  |  |  |  |  |  |  |  |  |  |  |  |  |  |  |  |  |  |  |  |  |  |  |  |  |  |  |  |  |  |  |  |  |  |  |  |  |  |  |  |  |  |  |  |  |  |  |  |  |  |  |  |  |  |  |  |  |  |  |  |  |  |  |  |  |  |  |  |  |  |  |  |  |  |  |  |  |  |  |  |  |  |  |  |  |  |  |  |  |  |  |  |  |  |  |  |  |  |  |  |  |  |  |  |  |  |  |  |  |  |  |  |  |  |  |  |  |  |  |  |  |  |  |  |  |  |  |  |  |  |  |  |  |  |  |  |  |  |  |  |  |  |  |  |  |  |  |  |  |  |  |  |  |  |  |  |  |  |  |  |  |  |  |  |  |  |  |  |  |  |  |  |  |  |  |  |  |  |  |  |  |  |  |  |  |  |  |  |  |  |  |  |  |  |  |  |  |  |  |  |  |  |  |  |  |  |  |  |  |  |  |  |  |  |  |  |  |  |  |  |  |  |  |  |  |  |  |  |  |  |  |  |  |  |  |  |  |  |  |  |  |  |  |  |  |  |  |  |  |  |  |  |  |  |  |  |  |  |  |  |  |  |  |  |  |  |  |  |  |  |  |  |  |  |  |  |  |  |  |  |  |  |  |  |  |  |  |  |  |  |  |  |  |  |  |  |  |  |  |  |  |  |  |  |  |  |  |  |  |  |  |  |  |  |  |  |  |  |  |  |  |  |  |  |  |  |  |  |  |  |  |  |  |  |  |  |  |  |  |  |  |  |  |  |  |  |  |  |  |  |  |  |  |  |  |  |  |  |  |  |  |  |  |  |  |  |  |  |  |  |  |  |  |  |  |  |  |  |  |  |  |  |  |  |  |  |  |  |  |  |  |  |  |  |  |  |  |  |  |  |  |  |  |  |  |  |  |  |  |  |  |  |  |    |
|--|--|--|--|----|--|--|--|--|--|--|--|--|--|--|--|--|--|--|--|--|--|--|--|--|--|--|--|--|--|--|--|--|--|--|--|--|--|--|--|--|--|--|--|--|--|--|--|--|--|--|--|--|--|--|--|--|--|--|--|--|--|--|--|--|--|--|--|--|--|--|--|--|--|--|--|--|--|--|--|--|--|--|--|--|--|--|--|--|--|--|--|--|--|--|--|--|--|--|--|--|--|--|--|--|--|--|--|--|--|--|--|--|--|--|--|--|--|--|--|--|--|--|--|--|--|--|--|--|--|--|--|--|--|--|--|--|--|--|--|--|--|--|--|--|--|--|--|--|--|--|--|--|--|--|--|--|--|--|--|--|--|--|--|--|--|--|--|--|--|--|--|--|--|--|--|--|--|--|--|--|--|--|--|--|--|--|--|--|--|--|--|--|--|--|--|--|--|--|--|--|--|--|--|--|--|--|--|--|--|--|--|--|--|--|--|--|--|--|--|--|--|--|--|--|--|--|--|--|--|--|--|--|--|--|--|--|--|--|--|--|--|--|--|--|--|--|--|--|--|--|--|--|--|--|--|--|--|--|--|--|--|--|--|--|--|--|--|--|--|--|--|--|--|--|--|--|--|--|--|--|--|--|--|--|--|--|--|--|--|--|--|--|--|--|--|--|--|--|--|--|--|--|--|--|--|--|--|--|--|--|--|--|--|--|--|--|--|--|--|--|--|--|--|--|--|--|--|--|--|--|--|--|--|--|--|--|--|--|--|--|--|--|--|--|--|--|--|--|--|--|--|--|--|--|--|--|--|--|--|--|--|--|--|--|--|--|--|--|--|--|--|--|--|--|--|--|--|--|--|--|--|--|--|--|--|--|--|--|--|--|--|--|--|--|--|--|--|--|--|--|--|--|--|--|--|--|--|--|--|--|--|--|--|--|--|--|--|--|--|--|--|--|--|--|--|--|--|--|--|--|--|--|--|--|--|--|--|--|--|--|--|--|--|--|--|--|--|--|--|--|--|--|--|--|--|--|--|--|--|--|--|--|--|--|--|--|--|--|--|--|--|--|--|--|--|--|--|--|--|--|--|--|--|--|--|--|--|--|--|--|--|--|--|--|--|--|--|--|--|--|--|--|--|--|--|--|--|--|--|--|--|--|--|--|--|--|--|--|--|--|--|--|--|--|--|--|--|--|--|--|--|--|--|--|--|--|--|--|--|--|--|--|--|--|--|--|--|--|--|--|--|--|--|--|--|--|--|--|--|--|--|--|--|--|--|--|--|--|--|--|--|--|--|--|--|--|--|--|--|--|--|--|--|--|--|--|--|--|--|--|--|--|--|--|--|--|--|--|--|--|--|--|--|--|--|--|--|--|--|--|--|--|--|--|--|--|--|--|--|--|--|--|--|--|--|--|--|--|--|--|--|--|--|--|--|--|--|--|--|--|--|--|--|--|--|--|--|--|--|--|--|--|--|--|--|--|--|--|--|--|--|--|--|--|--|--|--|--|--|--|--|--|--|--|--|--|--|--|--|--|--|--|--|--|--|--|--|--|--|--|--|--|--|--|--|--|--|--|--|--|--|--|--|--|--|--|--|--|--|--|--|--|--|--|--|--|--|--|--|--|--|--|--|--|--|--|--|--|--|--|--|--|--|--|--|--|--|--|--|--|--|--|--|--|--|--|--|--|--|--|--|--|--|--|--|--|--|--|--|--|--|--|--|--|--|--|--|--|--|--|--|--|--|--|--|--|--|--|--|--|--|--|--|--|--|--|--|--|--|--|--|--|--|--|--|--|--|--|--|--|--|--|--|--|--|--|--|--|--|--|--|--|--|--|--|--|--|--|--|--|--|--|--|--|--|--|--|--|--|--|--|--|--|--|--|--|--|--|--|--|--|--|--|--|--|--|--|--|--|--|--|--|--|--|--|--|--|--|--|--|--|--|--|--|--|--|--|--|--|--|--|--|--|--|--|--|--|--|--|--|--|--|--|--|--|--|--|--|--|--|--|--|--|--|--|--|--|--|--|--|--|--|--|--|--|--|--|--|--|--|--|--|--|--|--|--|--|--|--|--|--|--|--|--|--|--|--|--|--|--|--|--|--|--|--|--|--|--|--|--|--|--|--|--|--|--|--|--|--|--|--|--|--|--|--|--|--|--|--|--|--|--|--|--|--|--|--|--|--|--|--|--|--|--|--|--|--|--|--|--|--|--|--|--|--|--|--|--|--|--|--|--|--|--|--|--|--|--|--|--|--|--|--|--|--|--|--|--|--|--|--|--|--|--|--|--|--|--|--|--|--|--|--|--|--|--|--|--|--|--|--|--|--|--|--|--|--|--|--|--|--|--|--|--|--|--|--|--|--|--|--|--|--|--|--|--|--|--|--|--|--|--|--|--|--|--|--|--|--|--|--|--|--|--|--|--|--|--|--|--|--|--|--|--|--|--|--|--|--|--|--|--|--|--|--|--|--|--|--|--|--|--|--|--|--|--|--|--|--|--|--|--|--|--|--|--|--|--|--|--|--|--|--|--|--|--|--|--|--|--|--|--|--|--|--|--|--|--|--|--|--|--|--|--|--|--|--|--|--|--|--|--|--|--|--|--|--|--|--|--|--|--|--|--|--|--|--|--|--|--|--|--|--|--|--|--|--|--|--|--|--|--|--|--|--|--|--|--|--|--|--|--|--|--|--|--|--|--|--|--|--|--|--|--|--|--|--|--|--|--|--|--|--|--|--|--|--|--|--|--|--|--|--|--|--|--|--|--|--|--|--|--|--|--|--|--|--|--|--|--|--|--|--|--|--|--|--|--|--|--|--|--|--|--|--|--|--|--|--|--|--|--|--|--|--|--|--|--|--|--|--|--|--|--|--|--|--|--|--|--|--|--|--|--|--|--|--|--|--|--|--|--|--|--|--|--|--|--|--|--|--|--|--|--|--|--|--|--|--|--|--|--|--|--|--|--|--|--|--|--|--|--|--|--|--|--|--|--|--|--|--|--|--|--|--|--|--|--|--|--|--|--|--|--|--|--|--|--|--|--|--|--|--|--|--|--|--|--|--|--|--|--|--|--|--|--|--|--|--|--|--|--|--|--|--|--|--|--|--|--|--|--|--|--|--|--|--|--|--|--|--|--|--|--|--|--|--|--|--|--|--|--|--|--|--|--|--|--|--|--|--|--|--|--|--|--|--|--|--|--|--|--|--|--|--|--|--|--|--|--|--|--|--|--|--|--|--|--|--|--|--|--|--|--|--|--|--|--|--|--|--|--|--|--|--|--|--|--|--|--|--|--|--|--|--|--|--|--|--|--|--|--|--|--|--|--|--|--|--|--|--|--|--|--|--|--|--|--|--|--|--|--|--|--|--|--|--|--|--|--|--|--|--|--|--|--|--|--|--|--|--|--|--|--|--|--|--|--|--|--|--|--|----|
|  |  |  |  | -1 |  |  |  |  |  |  |  |  |  |  |  |  |  |  |  |  |  |  |  |  |  |  |  |  |  |  |  |  |  |  |  |  |  |  |  |  |  |  |  |  |  |  |  |  |  |  |  |  |  |  |  |  |  |  |  |  |  |  |  |  |  |  |  |  |  |  |  |  |  |  |  |  |  |  |  |  |  |  |  |  |  |  |  |  |  |  |  |  |  |  |  |  |  |  |  |  |  |  |  |  |  |  |  |  |  |  |  |  |  |  |  |  |  |  |  |  |  |  |  |  |  |  |  |  |  |  |  |  |  |  |  |  |  |  |  |  |  |  |  |  |  |  |  |  |  |  |  |  |  |  |  |  |  |  |  |  |  |  |  |  |  |  |  |  |  |  |  |  |  |  |  |  |  |  |  |  |  |  |  |  |  |  |  |  |  |  |  |  |  |  |  |  |  |  |  |  |  |  |  |  |  |  |  |  |  |  |  |  |  |  |  |  |  |  |  |  |  |  |  |  |  |  |  |  |  |  |  |  |  |  |  |  |  |  |  |  |  |  |  |  |  |  |  |  |  |  |  |  |  |  |  |  |  |  |  |  |  |  |  |  |  |  |  |  |  |  |  |  |  |  |  |  |  |  |  |  |  |  |  |  |  |  |  |  |  |  |  |  |  |  |  |  |  |  |  |  |  |  |  |  |  |  |  |  |  |  |  |  |  |  |  |  |  |  |  |  |  |  |  |  |  |  |  |  |  |  |  |  |  |  |  |  |  |  |  |  |  |  |  |  |  |  |  |  |  |  |  |  |  |  |  |  |  |  |  |  |  |  |  |  |  |  |  |  |  |  |  |  |  |  |  |  |  |  |  |  |  |  |  |  |  |  |  |  |  |  |  |  |  |  |  |  |  |  |  |  |  |  |  |  |  |  |  |  |  |  |  |  |  |  |  |  |  |  |  |  |  |  |  |  |  |  |  |  |  |  |  |  |  |  |  |  |  |  |  |  |  |  |  |  |  |  |  |  |  |  |  |  |  |  |  |  |  |  |  |  |  |  |  |  |  |  |  |  |  |  |  |  |  |  |  |  |  |  |  |  |  |  |  |  |  |  |  |  |  |  |  |  |  |  |  |  |  |  |  |  |  |  |  |  |  |  |  |  |  |  |  |  |  |  |  |  |  |  |  |  |  |  |  |  |  |  |  |  |  |  |  |  |  |  |  |  |  |  |  |  |  |  |  |  |  |  |  |  |  |  |  |  |  |  |  |  |  |  |  |  |  |  |  |  |  |  |  |  |  |  |  |  |  |  |  |  |  |  |  |  |  |  |  |  |  |  |  |  |  |  |  |  |  |  |  |  |  |  |  |  |  |  |  |  |  |  |  |  |  |  |  |  |  |  |  |  |  |  |  |  |  |  |  |  |  |  |  |  |  |  |  |  |  |  |  |  |  |  |  |  |  |  |  |  |  |  |  |  |  |  |  |  |  |  |  |  |  |  |  |  |  |  |  |  |  |  |  |  |  |  |  |  |  |  |  |  |  |  |  |  |  |  |  |  |  |  |  |  |  |  |  |  |  |  |  |  |  |  |  |  |  |  |  |  |  |  |  |  |  |  |  |  |  |  |  |  |  |  |  |  |  |  |  |  |  |  |  |  |  |  |  |  |  |  |  |  |  |  |  |  |  |  |  |  |  |  |  |  |  |  |  |  |  |  |  |  |  |  |  |  |  |  |  |  |  |  |  |  |  |  |  |  |  |  |  |  |  |  |  |  |  |  |  |  |  |  |  |  |  |  |  |  |  |  |  |  |  |  |  |  |  |  |  |  |  |  |  |  |  |  |  |  |  |  |  |  |  |  |  |  |  |  |  |  |  |  |  |  |  |  |  |  |  |  |  |  |  |  |  |  |  |  |  |  |  |  |  |  |  |  |  |  |  |  |  |  |  |  |  |  |  |  |  |  |  |  |  |  |  |  |  |  |  |  |  |  |  |  |  |  |  |  |  |  |  |  |  |  |  |  |  |  |  |  |  |  |  |  |  |  |  |  |  |  |  |  |  |  |  |  |  |  |  |  |  |  |  |  |  |  |  |  |  |  |  |  |  |  |  |  |  |  |  |  |  |  |  |  |  |  |  |  |  |  |  |  |  |  |  |  |  |  |  |  |  |  |  |  |  |  |  |  |  |  |  |  |  |  |  |  |  |  |  |  |  |  |  |  |  |  |  |  |  |  |  |  |  |  |  |  |  |  |  |  |  |  |  |  |  |  |  |  |  |  |  |  |  |  |  |  |  |  |  |  |  |  |  |  |  |  |  |  |  |  |  |  |  |  |  |  |  |  |  |  |  |  |  |  |  |  |  |  |  |  |  |  |  |  |  |  |  |  |  |  |  |  |  |  |  |  |  |  |  |  |  |  |  |  |  |  |  |  |  |  |  |  |  |  |  |  |  |  |  |  |  |  |  |  |  |  |  |  |  |  |  |  |  |  |  |  |  |  |  |  |  |  |  |  |  |  |  |  |  |  |  |  |  |  |  |  |  |  |  |  |  |  |  |  |  |  |  |  |  |  |  |  |  |  |  |  |  |  |  |  |  |  |  |  |  |  |  |  |  |  |  |  |  |  |  |  |  |  |  |  |  |  |  |  |  |  |  |  |  |  |  |  |  |  |  |  |  |  |  |  |  |  |  |  |  |  |  |  |  |  |  |  |  |  |  |  |  |  |  |  |  |  |  |  |  |  |  |  |  |  |  |  |  |  |  |  |  |  |  |  |  |  |  |  |  |  |  |  |  |  |  |  |  |  |  |  |  |  |  |  |  |  |  |  |  |  |  |  |  |  |  |  |  |  |  |  |  |  |  |  |  |  |  |  |  |  |  |  |  |  |  |  |  |  |  |  |  |  |  |  |  |  |  |  |  |  |  |  |  |  |  |  |  |  |  |  |  |  |  |  |  |  |  |  |  |  |  |  |  |  |  |  |  |  |  |  |  |  |  |  |  |  |  |  |  |  |  |  |  |  |  |  |  |  |  |  |  |  |  |  |  |  |  |  |  |  |  |  |  |  |  |  |  |  |  |  |  |  |  |  |  |  |  |  |  |  |  |  |  |  |  |  |  |  |  |  |  |  |  |  |  |  |  |  |  |  |  |  |  |  |  |  |  |  |  |  |  |  |  |  |  |  |  |  |  |  |  |  |  |  |  |  |  |  |  |  |  |  |  |  |  |  |  |  |  |  |  |  |  |  |  |  |  |  |  |  |  |  |  |  |  |  |  |  |  |  |  |  |  |  |  |  |  |  |  |  |  |  |  |  |  |  |  |  |  |  |  |  |  |  |  |  |  |  |  |  |  |  |  |  |  |  |  |  |  |  |  |  |  |  |  |  |  |  |  |  |  |  |  |  |  |  |  |  |  |  |  |  |  |  |  |  |  |  |  |  |  |  | </ |
|--|--|--|--|----|--|--|--|--|--|--|--|--|--|--|--|--|--|--|--|--|--|--|--|--|--|--|--|--|--|--|--|--|--|--|--|--|--|--|--|--|--|--|--|--|--|--|--|--|--|--|--|--|--|--|--|--|--|--|--|--|--|--|--|--|--|--|--|--|--|--|--|--|--|--|--|--|--|--|--|--|--|--|--|--|--|--|--|--|--|--|--|--|--|--|--|--|--|--|--|--|--|--|--|--|--|--|--|--|--|--|--|--|--|--|--|--|--|--|--|--|--|--|--|--|--|--|--|--|--|--|--|--|--|--|--|--|--|--|--|--|--|--|--|--|--|--|--|--|--|--|--|--|--|--|--|--|--|--|--|--|--|--|--|--|--|--|--|--|--|--|--|--|--|--|--|--|--|--|--|--|--|--|--|--|--|--|--|--|--|--|--|--|--|--|--|--|--|--|--|--|--|--|--|--|--|--|--|--|--|--|--|--|--|--|--|--|--|--|--|--|--|--|--|--|--|--|--|--|--|--|--|--|--|--|--|--|--|--|--|--|--|--|--|--|--|--|--|--|--|--|--|--|--|--|--|--|--|--|--|--|--|--|--|--|--|--|--|--|--|--|--|--|--|--|--|--|--|--|--|--|--|--|--|--|--|--|--|--|--|--|--|--|--|--|--|--|--|--|--|--|--|--|--|--|--|--|--|--|--|--|--|--|--|--|--|--|--|--|--|--|--|--|--|--|--|--|--|--|--|--|--|--|--|--|--|--|--|--|--|--|--|--|--|--|--|--|--|--|--|--|--|--|--|--|--|--|--|--|--|--|--|--|--|--|--|--|--|--|--|--|--|--|--|--|--|--|--|--|--|--|--|--|--|--|--|--|--|--|--|--|--|--|--|--|--|--|--|--|--|--|--|--|--|--|--|--|--|--|--|--|--|--|--|--|--|--|--|--|--|--|--|--|--|--|--|--|--|--|--|--|--|--|--|--|--|--|--|--|--|--|--|--|--|--|--|--|--|--|--|--|--|--|--|--|--|--|--|--|--|--|--|--|--|--|--|--|--|--|--|--|--|--|--|--|--|--|--|--|--|--|--|--|--|--|--|--|--|--|--|--|--|--|--|--|--|--|--|--|--|--|--|--|--|--|--|--|--|--|--|--|--|--|--|--|--|--|--|--|--|--|--|--|--|--|--|--|--|--|--|--|--|--|--|--|--|--|--|--|--|--|--|--|--|--|--|--|--|--|--|--|--|--|--|--|--|--|--|--|--|--|--|--|--|--|--|--|--|--|--|--|--|--|--|--|--|--|--|--|--|--|--|--|--|--|--|--|--|--|--|--|--|--|--|--|--|--|--|--|--|--|--|--|--|--|--|--|--|--|--|--|--|--|--|--|--|--|--|--|--|--|--|--|--|--|--|--|--|--|--|--|--|--|--|--|--|--|--|--|--|--|--|--|--|--|--|--|--|--|--|--|--|--|--|--|--|--|--|--|--|--|--|--|--|--|--|--|--|--|--|--|--|--|--|--|--|--|--|--|--|--|--|--|--|--|--|--|--|--|--|--|--|--|--|--|--|--|--|--|--|--|--|--|--|--|--|--|--|--|--|--|--|--|--|--|--|--|--|--|--|--|--|--|--|--|--|--|--|--|--|--|--|--|--|--|--|--|--|--|--|--|--|--|--|--|--|--|--|--|--|--|--|--|--|--|--|--|--|--|--|--|--|--|--|--|--|--|--|--|--|--|--|--|--|--|--|--|--|--|--|--|--|--|--|--|--|--|--|--|--|--|--|--|--|--|--|--|--|--|--|--|--|--|--|--|--|--|--|--|--|--|--|--|--|--|--|--|--|--|--|--|--|--|--|--|--|--|--|--|--|--|--|--|--|--|--|--|--|--|--|--|--|--|--|--|--|--|--|--|--|--|--|--|--|--|--|--|--|--|--|--|--|--|--|--|--|--|--|--|--|--|--|--|--|--|--|--|--|--|--|--|--|--|--|--|--|--|--|--|--|--|--|--|--|--|--|--|--|--|--|--|--|--|--|--|--|--|--|--|--|--|--|--|--|--|--|--|--|--|--|--|--|--|--|--|--|--|--|--|--|--|--|--|--|--|--|--|--|--|--|--|--|--|--|--|--|--|--|--|--|--|--|--|--|--|--|--|--|--|--|--|--|--|--|--|--|--|--|--|--|--|--|--|--|--|--|--|--|--|--|--|--|--|--|--|--|--|--|--|--|--|--|--|--|--|--|--|--|--|--|--|--|--|--|--|--|--|--|--|--|--|--|--|--|--|--|--|--|--|--|--|--|--|--|--|--|--|--|--|--|--|--|--|--|--|--|--|--|--|--|--|--|--|--|--|--|--|--|--|--|--|--|--|--|--|--|--|--|--|--|--|--|--|--|--|--|--|--|--|--|--|--|--|--|--|--|--|--|--|--|--|--|--|--|--|--|--|--|--|--|--|--|--|--|--|--|--|--|--|--|--|--|--|--|--|--|--|--|--|--|--|--|--|--|--|--|--|--|--|--|--|--|--|--|--|--|--|--|--|--|--|--|--|--|--|--|--|--|--|--|--|--|--|--|--|--|--|--|--|--|--|--|--|--|--|--|--|--|--|--|--|--|--|--|--|--|--|--|--|--|--|--|--|--|--|--|--|--|--|--|--|--|--|--|--|--|--|--|--|--|--|--|--|--|--|--|--|--|--|--|--|--|--|--|--|--|--|--|--|--|--|--|--|--|--|--|--|--|--|--|--|--|--|--|--|--|--|--|--|--|--|--|--|--|--|--|--|--|--|--|--|--|--|--|--|--|--|--|--|--|--|--|--|--|--|--|--|--|--|--|--|--|--|--|--|--|--|--|--|--|--|--|--|--|--|--|--|--|--|--|--|--|--|--|--|--|--|--|--|--|--|--|--|--|--|--|--|--|--|--|--|--|--|--|--|--|--|--|--|--|--|--|--|--|--|--|--|--|--|--|--|--|--|--|--|--|--|--|--|--|--|--|--|--|--|--|--|--|--|--|--|--|--|--|--|--|--|--|--|--|--|--|--|--|--|--|--|--|--|--|--|--|--|--|--|--|--|--|--|--|--|--|--|--|--|--|--|--|--|--|--|--|--|--|--|--|--|--|--|--|--|--|--|--|--|--|--|--|--|--|--|--|--|--|--|--|--|--|--|--|--|--|--|--|--|--|--|--|--|--|--|--|--|--|--|--|--|--|--|--|--|--|--|--|--|--|--|--|--|--|--|--|--|--|--|--|--|--|--|--|--|--|--|--|--|--|--|--|--|--|--|--|--|--|--|--|--|--|--|--|--|--|--|--|--|--|--|--|--|--|--|--|--|--|--|--|--|--|--|--|--|--|--|--|--|--|--|--|--|--|--|--|--|--|--|--|--|--|--|--|--|--|--|--|--|--|--|--|--|--|--|--|--|----|

Conservation

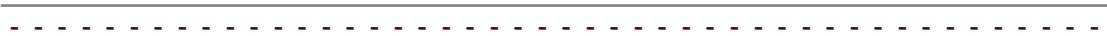

Quality

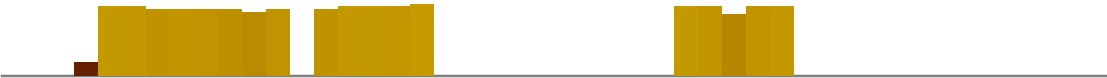

Consensus

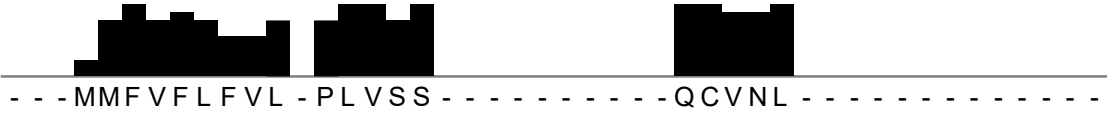

Occupancy

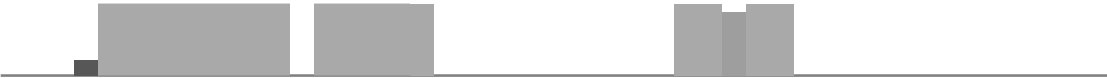

|                                           | 23-     | 27-     | 36V                                                     | 46S |
|-------------------------------------------|---------|---------|---------------------------------------------------------|-----|
| <b>SARS-CoV-2-Wuhan-Hu-1_spike/1-1273</b> | T T R T | Q L P P | A Y T N S F T R G V Y Y P D K V F R S S V L H S T Q D L |     |
| <i>RATG13/1-1270</i>                      | T T R T | Q L P P | A Y T N S S T R G V Y Y P D K V F R S S V L H L T Q D L |     |
| <i>ZXC21/1-1246</i>                       | T G R T | P L N P | N Y T N S S Q R G V Y Y P D T I Y R S D T L V L S Q G Y |     |
| <i>MP789/1-1266</i>                       | T G R A | A I Q P | S F T N S S Q R G V Y Y P D T I F R S N T L V L S Q G Y |     |
| <i>YN02/1-704</i>                         |         |         |                                                         |     |
| <i>GX-P2V/1-1270</i>                      | T T R T | G I P P | G Y T N S S T R G V Y Y P D K V F R S S I L H L T Q D L |     |
| <i>GX-P1E/1-1266</i>                      | T T R T | G I Q P | G Y T N S S T R G V Y Y P D K V F R S S I L H L T Q D L |     |
| <i>GX-P5E/1-1268</i>                      | T T R T | G I P P | G Y T N S S T R G V Y Y P D K V F R S S I L H L T Q D L |     |
| <i>GX-P4L/1-1268</i>                      | T T R T | G I P P | G Y T N S S T R G V Y Y P D K V F R S S I L H L T Q D L |     |
| <i>GX-P5L/1-1268</i>                      | T T R T | G I P P | G Y T N S S T R G V Y Y P D K V F R S S I L H L T Q D L |     |
| <i>Chicken/1-1154</i>                     |         |         |                                                         |     |
| <i>Duck/1-1192</i>                        |         |         |                                                         |     |
| <i>Turkey/1-1227</i>                      |         |         |                                                         |     |

## Conservation

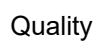

## Consensus

Occupancy

|                                           | 56L                         | 66H       | 70-       | 70-       | 70-       |
|-------------------------------------------|-----------------------------|-----------|-----------|-----------|-----------|
| <b>SARS-CoV-2-Wuhan-Hu-1_spike/1-1273</b> | F L P F F S N V T W F H A I | - - - H - | - - - - - | - - - - - | - - - - - |
| <i>RATG13/1-1270</i>                      | F L P F F S N V T W F H A I | - - - H - | - - - - - | - - - - - | - - - - - |
| <i>ZXC21/1-1246</i>                       | F L P F Y S N V S W Y Y S L | - - - T - | - - - - - | - - - - - | - - - - - |
| <i>MP789/1-1266</i>                       | F L P F Y S N V S W Y Y A L | - - - T - | - - - - - | - - - - - | - - - - - |
| <i>YN02/1-704</i>                         | - - - - -                   | - - - - - | - - - - - | - - - - - | - - - - - |
| <i>GX-P2V/1-1270</i>                      | F L P F F S N V T W F N T I | - - - H - | - - - - - | - - - - - | - - - - - |
| <i>GX-P1E/1-1266</i>                      | F L P F F S N V T W F N T I | - - - - - | - - - - - | - - - - - | - - - - - |
| <i>GX-P5E/1-1268</i>                      | F L P F F S N V T W F N T I | - - - - - | - - - - - | - - - - - | - - - - - |
| <i>GX-P4L/1-1268</i>                      | F L P F F S N V T W F N T I | - - - - - | - - - - - | - - - - - | - - - - - |
| <i>GX-P5L/1-1268</i>                      | F L P F F S N V T W F N T I | - - - - - | - - - - - | - - - - - | - - - - - |
| <i>Chicken/1-1154</i>                     | - - - - -                   | - - - - - | - - - - - | - - - - - | - - - - - |
| <i>Duck/1-1192</i>                        | - - - - -                   | - - - - - | - - - - - | - - - - - | - - - - - |
| <i>Turkey/1-1227</i>                      | - - - - -                   | - - - - - | - - - - - | - - - - - | - - - - - |

## Conservation

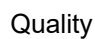

## Consensus

Occupancy

|                                           | 70- | 70- | 70- | 70-      |
|-------------------------------------------|-----|-----|-----|----------|
| <b>SARS-CoV-2-Wuhan-Hu-1_spike/1-1273</b> | -   | -   | -   | -        |
| <i>RATG13/1-1270</i>                      | -   | -   | -   | -        |
| <i>ZXC21/1-1246</i>                       | -   | -   | -   | -        |
| <i>MP789/1-1266</i>                       | -   | -   | -   | -        |
| <i>YN02/1-704</i>                         | -   | -   | -   | -        |
| <i>GX-P2V/1-1270</i>                      | -   | -   | -   | -        |
| <i>GX-P1E/1-1266</i>                      | -   | -   | -   | -        |
| <i>GX-P5E/1-1268</i>                      | -   | -   | -   | -        |
| <i>GX-P4L/1-1268</i>                      | -   | -   | -   | -        |
| <i>GX-P5L/1-1268</i>                      | -   | -   | -   | -        |
| <i>Chicken/1-1154</i>                     | -   | -   | -   | -MLVTPL- |
| <i>Duck/1-1192</i>                        | -   | -   | -   | -MLATLV- |
| <i>Turkey/1-1227</i>                      | -   | -   | -   | -MLVQLC- |

## Conservation

## Quality

## Consensus

Occupancy

|                                           | 70- | 70- | 70- | 70- |
|-------------------------------------------|-----|-----|-----|-----|
| <b>SARS-CoV-2-Wuhan-Hu-1_spike/1-1273</b> | -   | -   | -   | -   |
| <i>RATG13/1-1270</i>                      | -   | -   | -   | -   |
| <i>ZXC21/1-1246</i>                       | -   | -   | -   | -   |
| <i>MP789/1-1266</i>                       | -   | -   | -   | -   |
| <i>YN02/1-704</i>                         | -   | -   | -   | -   |
| <i>GX-P2V/1-1270</i>                      | -   | -   | -   | -   |
| <i>GX-P1E/1-1266</i>                      | -   | -   | -   | -   |
| <i>GX-P5E/1-1268</i>                      | -   | -   | -   | -   |
| <i>GX-P4L/1-1268</i>                      | -   | -   | -   | -   |
| <i>GX-P5L/1-1268</i>                      | -   | -   | -   | -   |
| <i>Chicken/1-1154</i>                     | -   | -   | -   | -   |
| <i>Duck/1-1192</i>                        | -   | -   | -   | -   |
| <i>Turkey/1-1227</i>                      | -   | -   | -   | -   |

## Conservation

## Quality

## Consensus

Occupancy





|                                           | 116S      | 117L   | 123- | 127V             | 134- |
|-------------------------------------------|-----------|--------|------|------------------|------|
| <b>SARS-CoV-2-Wuhan-Hu-1_spike/1-1273</b> | QS        | LLIVNN | A    | TNVV IKV         | CEF  |
| <i>RATG13/1-1270</i>                      | QS        | LLIVNN | A    | TNVV IKV         | CEF  |
| <i>ZXC21/1-1246</i>                       | QS        | LLIVNN | A    | TNV IKV          | CNF  |
| <i>MP789/1-1266</i>                       | QS        | LLIVNN | A    | TNV IKV          | CNF  |
| <i>YN02/1-704</i>                         | -         | -      | -    | -                | -    |
| <i>GX-P2V/1-1270</i>                      | QS        | LLIVNN | A    | TNVV IKV         | CEF  |
| <i>GX-P1E/1-1266</i>                      | QS        | LLIVNN | A    | TNVV IKV         | CEF  |
| <i>GX-P5E/1-1268</i>                      | QS        | LLIVNN | A    | TNVV IKV         | CEF  |
| <i>GX-P4L/1-1268</i>                      | QS        | LLIVNN | A    | TNVV IKV         | CEF  |
| <i>GX-P5L/1-1268</i>                      | QS        | LLIVNN | A    | TNVV IKV         | CEF  |
| <i>Chicken/1-1154</i>                     | S         | IAMTA  | -    | PSSGMAWSSSQFCTAH | -    |
| <i>Duck/1-1192</i>                        | -         | YY     | -    | INDTTEAFSITIPRAV | -    |
| <i>Turkey/1-1227</i>                      | QGDFLKNYD | -      | -    | AVGIMFWWGLATNVGK | -    |

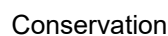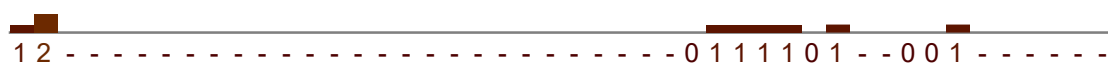

## Quality

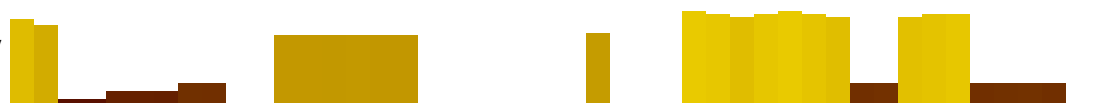

## Consensus

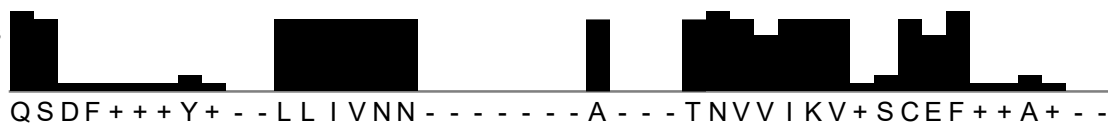

Occupancy

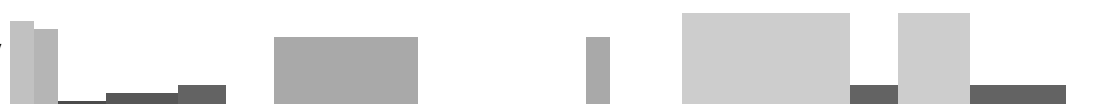



[illegible]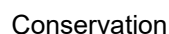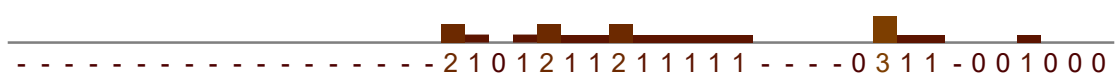

## Quality

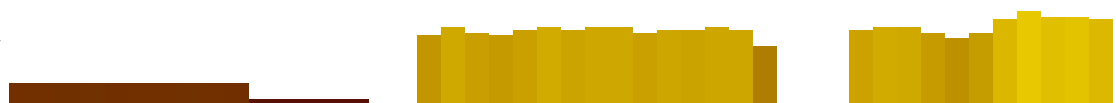

## Consensus

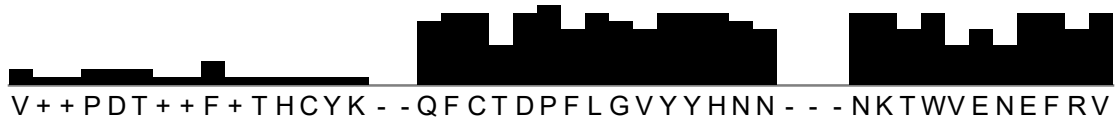

Occupancy

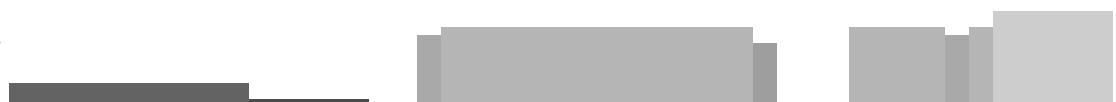

|                                           | 169E      | 179L                       | 189L                  | 199G                 |                   |
|-------------------------------------------|-----------|----------------------------|-----------------------|----------------------|-------------------|
| <b>SARS-CoV-2-Wuhan-Hu-1_spike/1-1273</b> | YSSAN     | NCTFEYV                    | SQPFLMDLE             | EGKQGNFKNLREFVFKNI   | DGYFKIYS          |
| <i>RATG13/1-1270</i>                      | YSSAN     | NCTFEYV                    | SQPFLMDLE             | EGKQGNFKNLREFVFKNI   | DGYFKIYS          |
| <i>ZXC21/1-1246</i>                       | YSFYA     | NCTFEYV                    | SKSFMLN               | ISGNGGLFNTLREFVFRNV  | DGHFKIYS          |
| <i>MP789/1-1266</i>                       | YSSYA     | NCTFEYV                    | SKSFML                | DIAGKSGLFDTLREFVFRNV | DGYFKIYS          |
| <i>YN02/1-704</i>                         | - - - - - | - - - - -                  | - - - - -             | - - - - -            | - - - - -         |
| <i>GX-P2V/1-1270</i>                      | YSSAN     | NCTFEYI                    | SQPFLMDLE             | EGKQGNFKNLREFVFKNV   | DGYFKIYS          |
| <i>GX-P1E/1-1266</i>                      | YSSAN     | NCTFEYI                    | SQPFLMDLE             | EGKQGNFKNLREFVFKNV   | DGYFKIYS          |
| <i>GX-P5E/1-1268</i>                      | YSSAN     | NCTFEYI                    | SQPFLMDLE             | EGKQGNFKNLREFVFKNV   | DGYFKIYS          |
| <i>GX-P4L/1-1268</i>                      | YSSAN     | NCTFEYI                    | SQPFLMDLE             | EGKQGNFKNLREFVFKNV   | DGYFKIYS          |
| <i>GX-P5L/1-1268</i>                      | YSSAN     | NCTFEYI                    | SQPFLMDLE             | EGKQGNFKNLREFVFKNV   | DGYFKIYS          |
| <i>Chicken/1-1154</i>                     | L - - FY  | NLT                        | V - - - - - - - - - - | SVAKYPTCKSFQCV       | NNFTSVYLNG        |
| <i>Duck/1-1192</i>                        | F - - LL  | TA - K - - - - - - - - - - | QLLVYGT               | IQSLMFLR - NG        | TWYING            |
| <i>Turkey/1-1227</i>                      | F - - FL  | NS - K - - - - - - - - - - | NFTG                  | FHKVKS               | SVIFIA - TGDIFVNG |

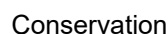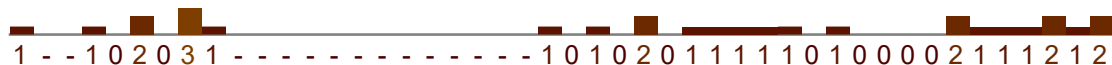

## Quality

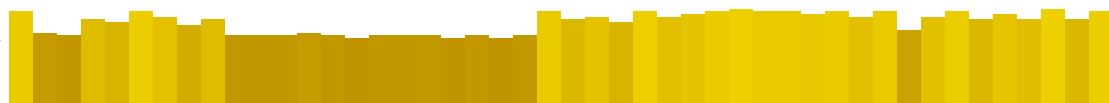

## Consensus

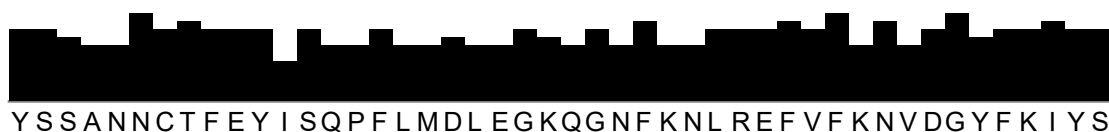

Occupancy

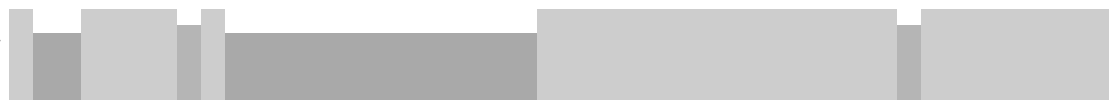

|                                           | 209P      | 217P                  | 227V                                               | 237R      | 247S      |
|-------------------------------------------|-----------|-----------------------|----------------------------------------------------|-----------|-----------|
| <b>SARS-CoV-2-Wuhan-Hu-1_spike/1-1273</b> | KHTPI NL  | VRDL PQGFS            | SALEPLVDLP I G I N I T R F Q T L L A L H R S Y L   |           |           |
| <i>RATG13/1-1270</i>                      | KHTPI NL  | VRDL PP GFS           | SALEPLVDLP I G I N I T R F Q T L L A L H R S Y L   |           |           |
| <i>ZXC21/1-1246</i>                       | KFTPVNL   | NRGLPTGL SVLQPLVELPVS | I N I T K F R T L L T I H R G D P                  |           |           |
| <i>MP789/1-1266</i>                       | KYTPVNV   | NSNLP I GFS           | SALEPLVE I P A G I N I T K F R T L L T I H R G D P |           |           |
| <i>YN02/1-704</i>                         | - - - - - | - - - - -             | - - - - -                                          | - - - - - | - - - - - |
| <i>GX-P2V/1-1270</i>                      | KHTPI DL  | VRDL PRGFA            | ALEPLVDLP I G I N I T R F Q T L L A L H R S Y L    |           |           |
| <i>GX-P1E/1-1266</i>                      | KHTPI DL  | VRDL PRGFA            | ALEPLVDLP I G I N I T R F Q T L L A L H R S Y L    |           |           |
| <i>GX-P5E/1-1268</i>                      | KHTPI DL  | VRDL PRGFA            | ALEPLVDLP I G I N I T R F Q T L L A L H R S Y L    |           |           |
| <i>GX-P4L/1-1268</i>                      | KHTPI DL  | VRDL PRGFA            | ALEPLVDLP I G I N I T R F Q T L L A L H R S Y L    |           |           |
| <i>GX-P5L/1-1268</i>                      | KHTPI DL  | VRDL PRGFA            | ALEPLVDLP I G I N I T R F Q T L L A L H R S Y L    |           |           |
| <i>Chicken/1-1154</i>                     | - - - - - | DL - - - VYTSNE       | - - - - -                                          | - - - - - | - - - - - |
| <i>Duck/1-1192</i>                        | - - - - - | VPALPVSYTFNT          | - - - - -                                          | - - - - - | - - - - - |
| <i>Turkey/1-1227</i>                      | - - - - - | VL MGFYNL NFTQ        | - - - - -                                          | - - - - - | - - - - - |

## Conservation

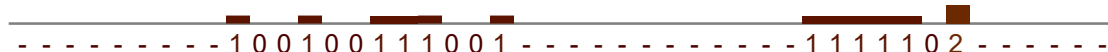

## Quality

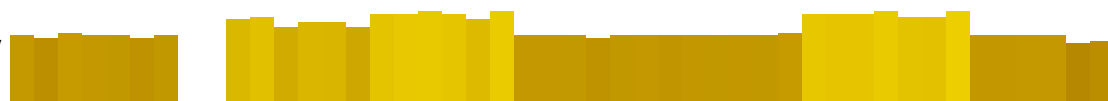

## Consensus

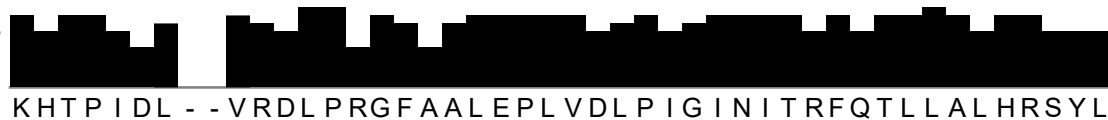

Occupancy

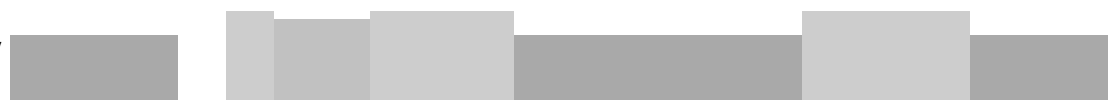

[illegible]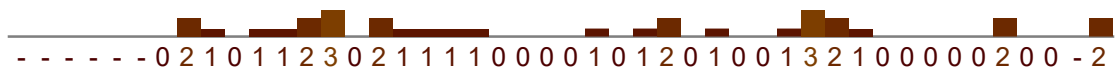

## Quality

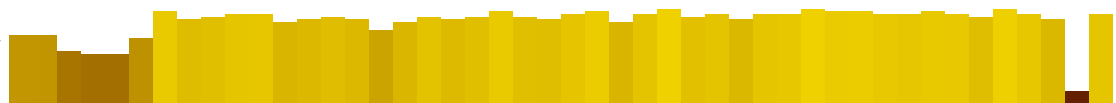

## Consensus

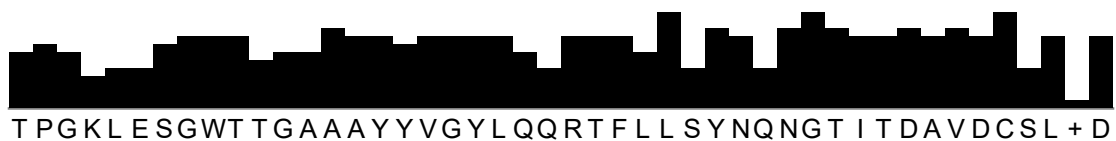

Occupancy

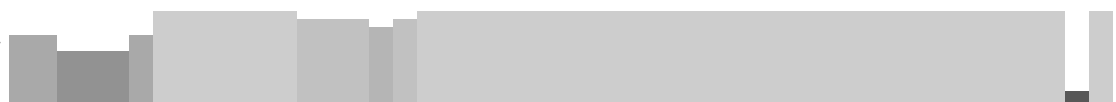

|                                           | 296L               | 306F               | 316S         | 326I               | 333-       |            |
|-------------------------------------------|--------------------|--------------------|--------------|--------------------|------------|------------|
| <b>SARS-CoV-2-Wuhan-Hu-1_spike/1-1273</b> | PLSETKCTLKSL       | FTVEKG             | IYQTSNFRVQPT | ESIVR              | FPNI       | - - - - TN |
| <i>RATG13/1-1270</i>                      | PLSETKCTLKSL       | FTVEKG             | IYQTSNFRVQPT | DSIVR              | FPNI       | - - - - TN |
| <i>ZXC21/1-1246</i>                       | PLSETKCTLKSL       | SVQKG              | IYQTSNFRVQPT | QSIVR              | FPNI       | - - - - TN |
| <i>MP789/1-1266</i>                       | PLSEAKCTLKSL       | LTVEKG             | IYQTSNFRVQPT | ESIVR              | FPNI       | - - - - TN |
| <i>YN02/1-704</i>                         | - - - - -          | - - - - -          | - - - - -    | - - - - -          | - - - - -  | - - - - -  |
| <i>GX-P2V/1-1270</i>                      | PLSETKCTLKSL       | LTVEKG             | IYQTSNFRVQPT | ISIVR              | FPNI       | - - - - TN |
| <i>GX-P1E/1-1266</i>                      | PLSETKCTLKSL       | LTVEKG             | IYQTSNFRVQPT | ISIVR              | FPNI       | - - - - TN |
| <i>GX-P5E/1-1268</i>                      | PLSETKCTLKSL       | LTVEKG             | IYQTSNFRVQPT | ISIVR              | FPNI       | - - - - TN |
| <i>GX-P4L/1-1268</i>                      | PLSETKCTLKSL       | LTVEKG             | IYQTSNFRVQPT | ISIVR              | FPNI       | - - - - TN |
| <i>GX-P5L/1-1268</i>                      | PLSETKCTLKSL       | LTVEKG             | IYQTSNFRVQPT | ISIVR              | FPNI       | - - - - TN |
| <i>Chicken/1-1154</i>                     | PRGLLACQYNTGNFSDGF | YFPFIN             | SSLVKQK      | - - FIVYRENSVNTTFT |            |            |
| <i>Duck/1-1192</i>                        | IINSMQCSHQRFNFSTGL | HSYDSVVPVSGNVTYIPY | PGVGDNSSLE   |                    |            |            |
| <i>Turkey/1-1227</i>                      | TINKLR             | CAYQQFNFSTGF       | YDIDTF       | VPVTSNITYLPY       | PDLKDNTGQE |            |

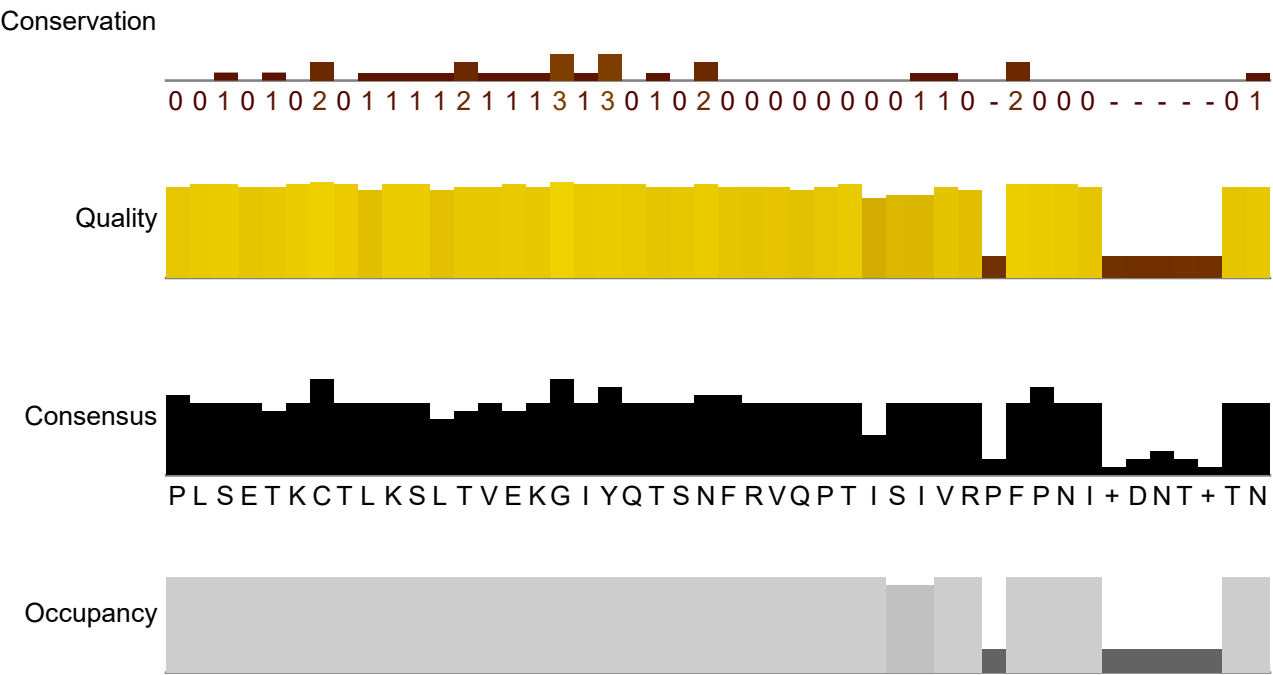





|                                           | 425L               | 435A            | 445V                  | 449- | 449-     |
|-------------------------------------------|--------------------|-----------------|-----------------------|------|----------|
| <b>SARS-CoV-2-Wuhan-Hu-1_spike/1-1273</b> | NYKLPDDFTGCVIAWNS  | NNL             | DSKVGGN               | -    | -        |
| <i>RATG13/1-1270</i>                      | NYKLPDDFTGCVIAWNS  | SKHI            | DAKEGGN               | -    | -        |
| <i>ZXC21/1-1246</i>                       | NYKLPDDFTGCVIAWNT  | AQDT            | -                     | -    | -        |
| <i>MP789/1-1266</i>                       | NYKLPDDFTGCVIAWNS  | NNL             | DSKVGGN               | -    | -        |
| <i>YN02/1-704</i>                         | -                  | -               | -                     | -    | -        |
| <i>GX-P2V/1-1270</i>                      | NYKLPDDFTGCVIAWNS  | VKQDAL          | TGGN                  | -    | -        |
| <i>GX-P1E/1-1266</i>                      | NYKLPDDFTGCVIAWNS  | VKQDAL          | TGGN                  | -    | -        |
| <i>GX-P5E/1-1268</i>                      | NYKLPDDFTGCVIAWNS  | VKQDAL          | TGDN                  | -    | -        |
| <i>GX-P4L/1-1268</i>                      | NYKLPDDFTGCVIAWNS  | VKQDAL          | TGGN                  | -    | -        |
| <i>GX-P5L/1-1268</i>                      | NYKLPDDFTGCVIAWNS  | VKQDAL          | TGGN                  | -    | -        |
| <i>Chicken/1-1154</i>                     | YH - - - P - - - S | CIFRLE          | - - - - - T - - - - - | I    | NNGWGFNS |
| <i>Duck/1-1192</i>                        | I                  | VPHYTTCSSLGLSLS | - - - - - N - - - - - | I    | NNNLGFD  |
| <i>Turkey/1-1227</i>                      | T                  | IPNYPTCSSKGLSLE | - - - - - N - - - - - | I    | YNNIGFNR |

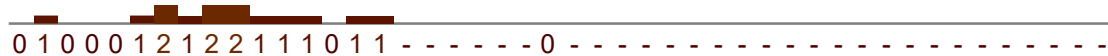

## Quality

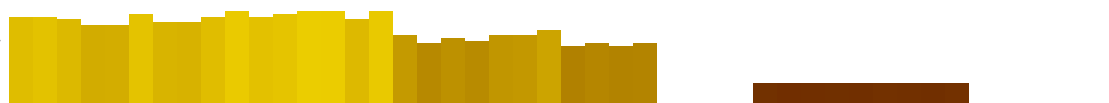

## Consensus

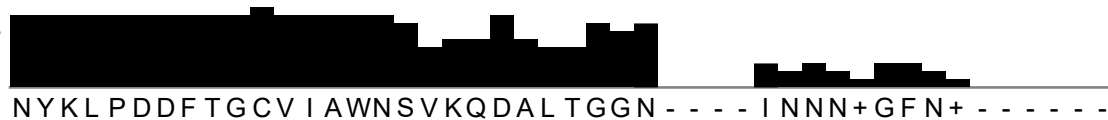

Occupancy

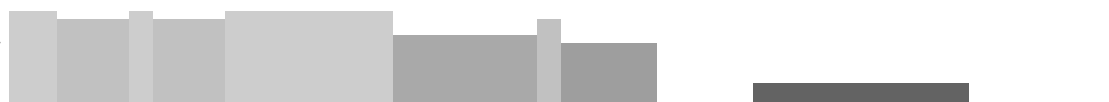









|                                           |              |      |      |           |      |      |            |
|-------------------------------------------|--------------|------|------|-----------|------|------|------------|
| <b>SARS-CoV-2-Wuhan-Hu-1_spike/1-1273</b> | VVVLSFELL    | 519- | 519- | HAPATVCGP | 523T | 528K | KKSTNLV    |
| <i>RATG13/1-1270</i>                      | VVVLSFELL    |      |      | NAPATVCGP |      |      | KKSTNLV    |
| <i>ZXC21/1-1246</i>                       | VVVLSFELL    |      |      | NAPATVCGP |      |      | KLSTQLV    |
| <i>MP789/1-1266</i>                       | VVVLSFELL    |      |      | KAPATVCGP |      |      | KQSTNLV    |
| <i>YN02/1-704</i>                         | - - - - -    |      |      | - - - - - |      |      | - - - - -  |
| <i>GX-P2V/1-1270</i>                      | VVVLSXELL    |      |      | NGPATVCGP |      |      | KLSTTLV    |
| <i>GX-P1E/1-1266</i>                      | VVVLSFELL    |      |      | NGPATVCGP |      |      | KLSTTLV    |
| <i>GX-P5E/1-1268</i>                      | VVVLSFELL    |      |      | NGPATVCGP |      |      | KLSTTLV    |
| <i>GX-P4L/1-1268</i>                      | VVVLSFELL    |      |      | NGPATVCGP |      |      | KLSTTLV    |
| <i>GX-P5L/1-1268</i>                      | VVVLSFELL    |      |      | NGPATVCGP |      |      | KLSTTLV    |
| <i>Chicken/1-1154</i>                     | YVTKSDGSRIQT |      |      | ATQPPV    |      |      | ITQHIYKNIT |
| <i>Duck/1-1192</i>                        | YGV          |      |      | -Q-       |      |      | I PPQVIY   |
| <i>Turkey/1-1227</i>                      | YSVK         |      |      | -T-       |      |      | -APMQFIY   |

Conservation

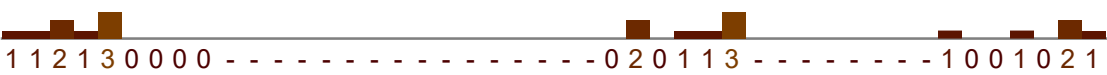

Quality

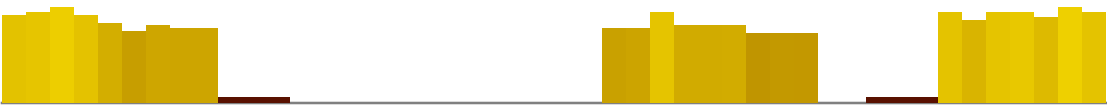

Consensus

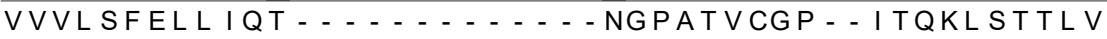

Occupancy

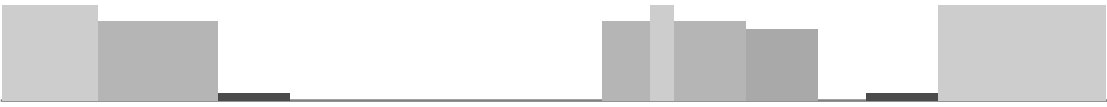





|                                           | 618T | 628Q | 636Y | 646R | 656V |   |   |   |   |   |   |   |   |   |   |   |   |   |   |   |   |   |   |   |   |   |   |   |   |   |   |   |   |   |   |   |   |   |   |   |   |   |   |   |   |   |
|-------------------------------------------|------|------|------|------|------|---|---|---|---|---|---|---|---|---|---|---|---|---|---|---|---|---|---|---|---|---|---|---|---|---|---|---|---|---|---|---|---|---|---|---|---|---|---|---|---|---|
| <b>SARS-CoV-2-Wuhan-Hu-1_spike/1-1273</b> | C    | T    | E    | V    | P    | V | A | I | H | A | D | Q | L | T | - | - | P | T | W | R | V | Y | S | T | G | S | N | V | F | Q | T | R | A | G | C | L | I | G | A | E | H | V | - | - | - | - |
| <i>RATG13/1-1270</i>                      | C    | T    | E    | V    | P    | V | A | I | H | A | D | Q | L | T | - | - | P | T | W | R | V | Y | S | T | G | S | N | V | F | Q | T | R | A | G | C | L | I | G | A | E | H | V | - | - | - | - |
| <i>ZXC21/1-1246</i>                       | C    | T    | D    | V    | P    | T | T | I | H | A | D | Q | L | T | - | - | P | A | W | R | I | Y | A | I | G | T | S | V | F | Q | T | Q | A | G | C | L | I | G | A | E | H | V | - | - | - | - |
| <i>MP789/1-1266</i>                       | C    | T    | E    | V    | P    | V | A | I | H | A | D | Q | L | T | - | - | P | T | W | R | V | Y | S | T | G | S | N | V | F | Q | T | R | A | G | C | L | I | G | A | E | H | V | - | - | - | - |
| <i>YN02/1-704</i>                         | C    | T    | D    | V    | P    | T | A | L | G | L | D | Q | I | S | - | - | A | A | W | R | V | Y | A | I | G | N | D | V | F | Q | T | Q | A | G | C | L | V | G | A | E | H | T | - | - | - | - |
| <i>GX-P2V/1-1270</i>                      | C    | T    | E    | V    | P    | M | A | I | H | A | E | Q | L | T | - | - | P | A | W | R | V | Y | S | A | G | A | N | V | F | Q | T | R | A | G | C | L | V | G | A | E | H | V | - | - | - | - |
| <i>GX-P1E/1-1266</i>                      | C    | T    | E    | V    | P    | M | A | I | H | A | E | Q | L | T | - | - | P | A | W | R | V | Y | S | A | G | A | N | V | F | Q | T | R | A | G | C | L | V | G | A | E | H | V | - | - | - | - |
| <i>GX-P5E/1-1268</i>                      | C    | T    | E    | V    | P    | M | A | I | H | A | E | Q | L | T | - | - | P | A | W | R | V | Y | S | A | G | A | N | V | F | Q | T | R | A | G | C | L | V | G | A | E | H | V | - | - | - | - |
| <i>GX-P4L/1-1268</i>                      | C    | T    | E    | V    | P    | M | A | I | H | A | E | Q | L | T | - | - | P | A | W | R | V | Y | S | A | G | A | N | V | F | Q | T | R | A | G | C | L | V | G | A | E | H | V | - | - | - | - |
| <i>GX-P5L/1-1268</i>                      | C    | T    | E    | V    | P    | M | A | I | H | A | E | Q | L | T | - | - | P | A | W | R | V | Y | S | A | G | A | N | V | F | Q | T | R | A | G | C | L | V | G | A | E | H | V | - | - | - | - |
| <i>Chicken/1-1154</i>                     | E    | P    | G    | T    | Q    | - | - | L | L | E | N | Q | F | Y | - | - | - | - | - | - | - | - | - | - | I | - | - | - | - | K | I | T | N | G | T | R | R | F | - | - | - | - | - | - | - |   |
| <i>Duck/1-1192</i>                        | C    | D    | -    | -    | -    | - | - | I | V | F | N | L | N | - | - | - | - | - | - | - | - | - | - | L | G | N | E | T | T | P | V | D | G | G | C | L | V | F | N | S | T | F | K | N | R | - |
| <i>Turkey/1-1227</i>                      | C    | W    | -    | -    | -    | - | - | L | A | D | Q | F | N | - | - | - | - | - | - | - | - | - | - | L | G | N | H | T | E | Y | V | D | G | G | C | L | I | S | N | K | T | I | S | R | K | R |

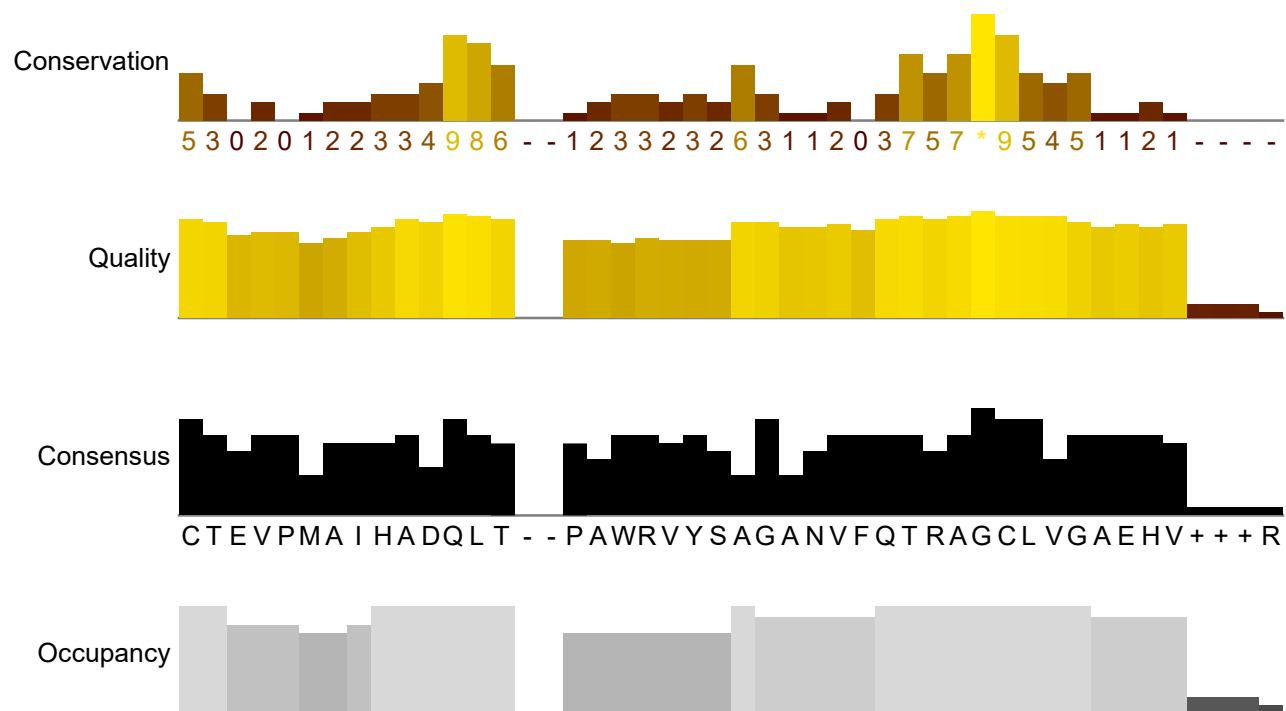

[illegible]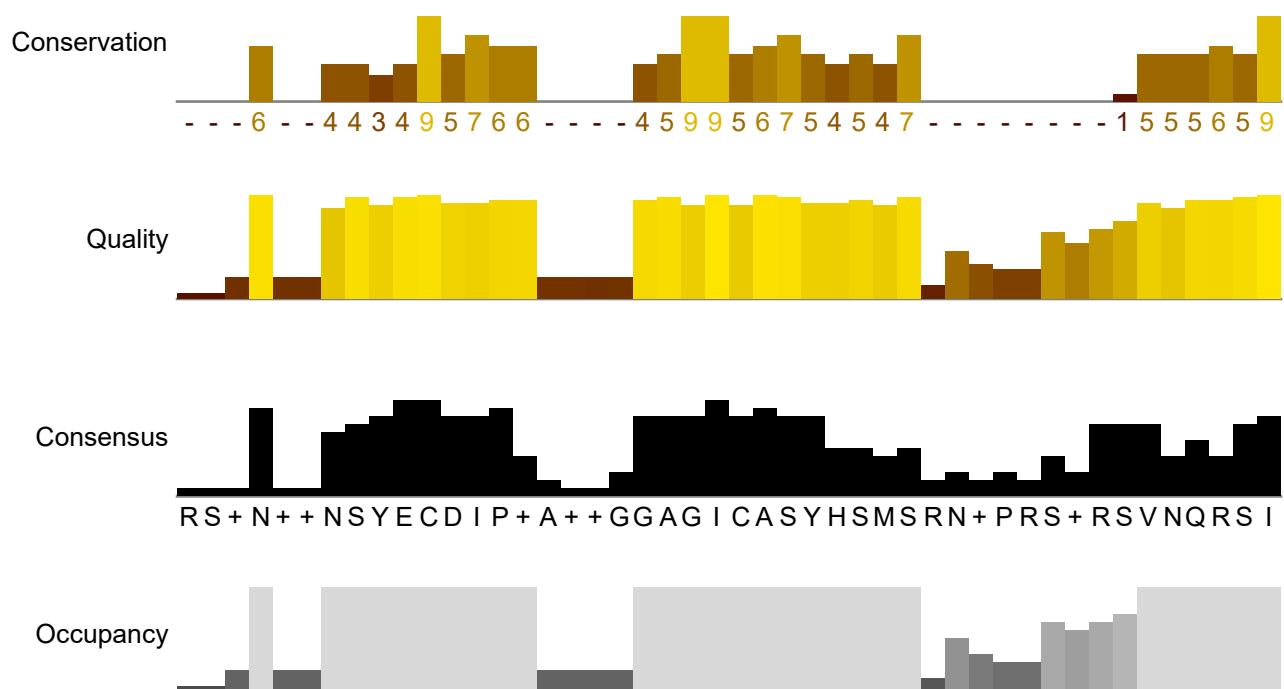



|                                           |           | 699L          | 708S                          | 718F                      | 728P              |
|-------------------------------------------|-----------|---------------|-------------------------------|---------------------------|-------------------|
| <b>SARS-CoV-2-Wuhan-Hu-1_spike/1-1273</b> | - - -     | I A Y T M S L | - G A E N S V A Y S N N S I A | I P T N F T I S V T T E   | I L P V S M T K T |
| <i>RATG13/1-1270</i>                      | - - -     | I A Y T M S L | - G A E N S V A Y S N N S I A | I P T N F T I S V T T E   | I L P V S M T K T |
| <i>ZXC21/1-1246</i>                       | - - -     | V A Y T M S L | - G A E N S I A Y A N N S I A | I P T N F S I S V T T E   | V M P V S M A K T |
| <i>MP789/1-1266</i>                       | - - -     | I A Y T M S L | - G A E N S V A Y A N N S I A | I P T N F T I S V T T E   | I L P V S M T K T |
| <i>YN02/1-704</i>                         | - - -     | I A Y A M S I | - G A E S S I A Y S N N S I A | I P T N F S I Q V T T E   | V L P V S M S K T |
| <i>GX-P2V/1-1270</i>                      | - - -     | I A Y T M S L | - G A E N S V A Y S N N S I A | I P T N F T I S V T T E   | I L P V S M T K T |
| <i>GX-P1E/1-1266</i>                      | - - -     | I A Y T M S L | - G A E N S V A Y S N N S I A | I P T N F T I S V T T E   | I L P V S M T K T |
| <i>GX-P5E/1-1268</i>                      | - - -     | I A Y T M S L | - G A E N S V A Y S N N S I A | I P T N F T I S V T T E   | I L P V S M T K T |
| <i>GX-P4L/1-1268</i>                      | - - -     | I A Y T M S L | - G A E N S V A Y S N N S I A | I P T N F T I S V T T E   | I L P V S M T K T |
| <i>GX-P5L/1-1268</i>                      | - - -     | I A Y T M S L | - G A E N S V A Y S N N S I A | I P T N F T I S V T T E   | I L P V S M T K T |
| <i>Chicken/1-1154</i>                     | - - - - - | - - - - -     | - A P L L N V T E N V L       | I P N S F N L T V T D E Y | I Q T R M D K V   |
| <i>Duck/1-1192</i>                        | - - - - - | - - - - -     | - E P L L D V T A N V S       | I P Y T L T L A V T T E Y | L Q T S Y Q K V   |
| <i>Turkey/1-1227</i>                      | - - - - - | - - - - -     | - Q P L L G V V A N V S       | I P K E L T L A V T T E Y | L Q T R Y Q K V   |

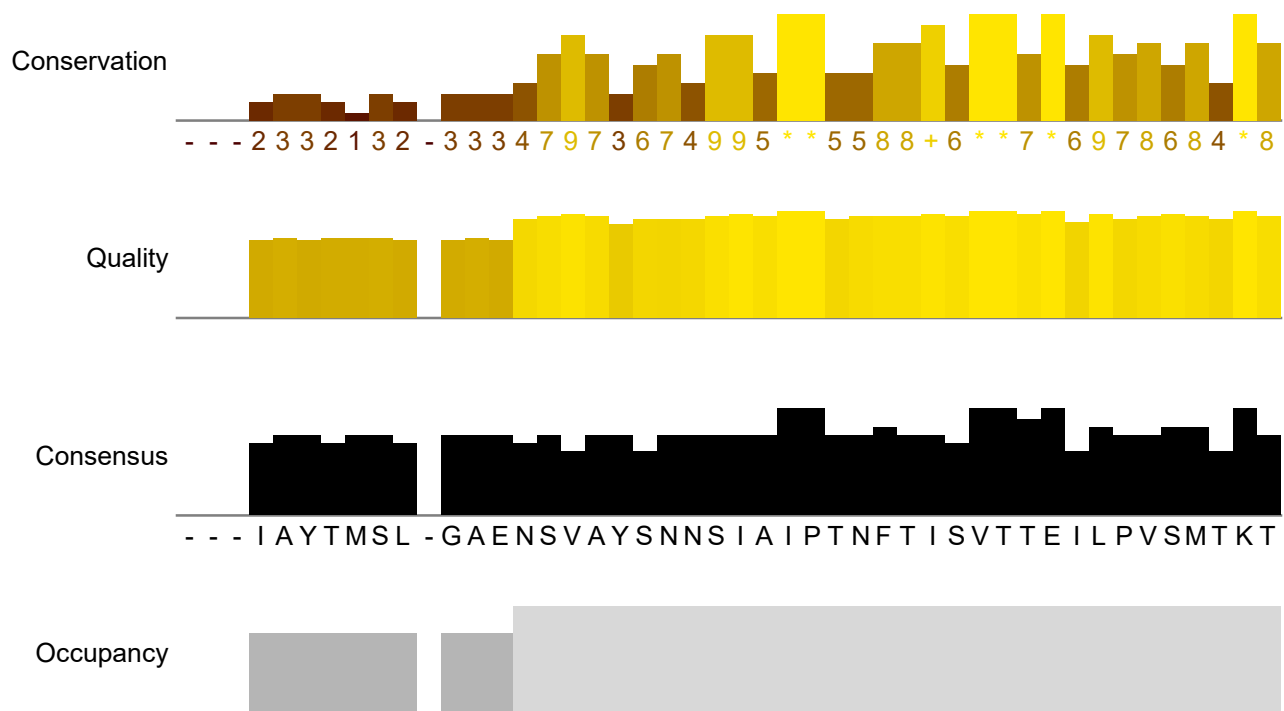

|                                           | 738C |   |   |   | 748E |   |   |   | 758S |   |   |   | 768T |   |   |   | 778T |   |   |   |   |   |   |   |   |   |   |   |   |   |   |   |   |   |   |   |   |   |   |   |   |   |   |   |   |   |
|-------------------------------------------|------|---|---|---|------|---|---|---|------|---|---|---|------|---|---|---|------|---|---|---|---|---|---|---|---|---|---|---|---|---|---|---|---|---|---|---|---|---|---|---|---|---|---|---|---|---|
| <b>SARS-CoV-2-Wuhan-Hu-1_spike/1-1273</b> | S    | V | D | C | T    | M | Y | I | C    | G | D | S | T    | E | C | S | N    | L | L | L | Q | Y | G | S | F | C | T | Q | L | N | R | A | L | T | G | I | A | V | E | Q | D | K | N | T | Q | E |
| <i>RATG13/1-1270</i>                      | S    | V | D | C | T    | M | Y | I | C    | G | D | S | T    | E | C | S | N    | L | L | L | Q | Y | G | S | F | C | T | Q | L | N | R | A | L | T | G | I | A | V | E | Q | D | K | N | T | Q | E |
| <i>ZXC21/1-1246</i>                       | S    | V | D | C | T    | M | Y | I | C    | G | D | S | I    | E | C | S | N    | L | L | L | Q | Y | G | S | F | C | T | Q | L | N | R | A | L | S | G | I | A | I | E | Q | D | K | N | T | Q | E |
| <i>MP789/1-1266</i>                       | S    | V | D | C | T    | M | Y | I | C    | G | D | S | I    | E | C | S | N    | L | L | L | Q | Y | G | S | F | C | T | Q | L | N | R | A | L | T | G | I | A | V | E | Q | D | K | N | T | Q | E |
| <i>YN02/1-704</i>                         | S    | V | D | C | T    | M | Y | I | C    | G | D | S | Q    | E | C | N | K    | L | L | L | Q | Y | G | S | F | C | A | Q | L | N | R | A | L | S | G | V | A | V | E | Q | D | K | N | T | E | A |
| <i>GX-P2V/1-1270</i>                      | S    | V | D | C | T    | M | Y | I | C    | G | D | S | I    | E | C | S | N    | L | L | L | Q | Y | G | S | F | C | T | Q | L | N | R | A | L | T | G | I | A | V | E | Q | D | K | N | T | Q | E |
| <i>GX-P1E/1-1266</i>                      | S    | V | D | C | T    | M | Y | I | C    | G | D | S | I    | E | C | S | N    | L | L | L | Q | Y | G | S | F | C | T | Q | L | N | R | A | L | T | G | I | A | V | E | Q | D | K | N | T | Q | E |
| <i>GX-P5E/1-1268</i>                      | S    | V | D | C | T    | M | Y | I | C    | G | D | S | I    | E | C | S | N    | L | L | L | Q | Y | G | S | F | C | T | Q | L | N | R | A | L | T | G | I | A | V | E | Q | D | K | N | T | Q | E |
| <i>GX-P4L/1-1268</i>                      | S    | V | D | C | T    | M | Y | I | C    | G | D | S | I    | E | C | S | N    | L | L | L | Q | Y | G | S | F | C | T | Q | L | N | R | A | L | T | G | I | A | V | E | Q | D | K | N | T | Q | E |
| <i>GX-P5L/1-1268</i>                      | S    | V | D | C | T    | M | Y | I | C    | G | D | S | I    | E | C | S | N    | L | L | L | Q | Y | G | S | F | C | T | Q | L | N | R | A | L | T | G | I | A | V | E | Q | D | K | N | T | Q | E |
| <i>Chicken/1-1154</i>                     | Q    | I | N | C | L    | Q | Y | V | C    | G | N | S | L    | D | C | R | E    | L | F | Q | Q | Y | G | P | V | C | D | N | I | L | S | V | V | N | S | V | G | K | K | E | D | M | E | L | L | N |
| <i>Duck/1-1192</i>                        | T    | I | D | C | A    | R | Y | V | C    | G | E | S | L    | K | C | R | T    | L | L | Q | Q | Y | G | S | F | C | T | S | V | N | N | I | L | A | G | V | N | D | N | E | D | N | G | M | L | S |
| <i>Turkey/1-1227</i>                      | T    | I | D | C | A    | K | Y | V | C    | G | D | S | T    | R | C | R | T    | L | L | Q | Q | Y | G | S | F | C | Q | S | V | N | A | I | L | S | G | V | N | E | N | E | D | N | G | L | L | Q |

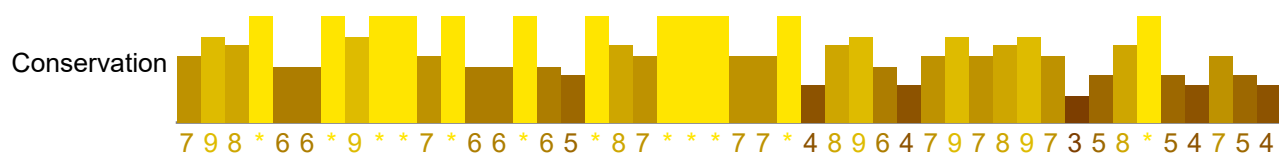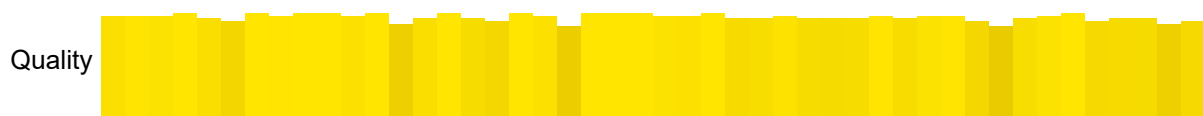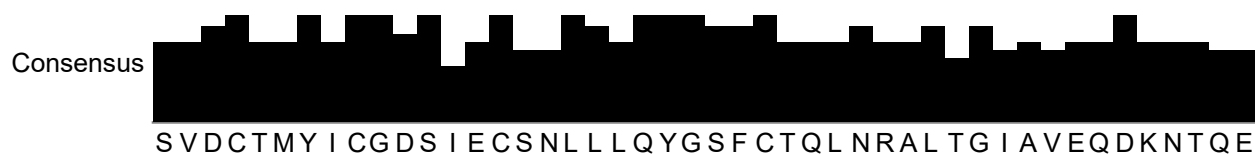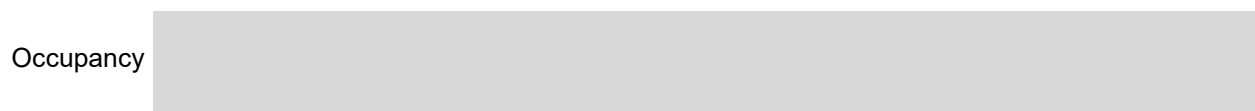

|                                           |          | 787-                              | 792P                                          | 802F                | 809-            |
|-------------------------------------------|----------|-----------------------------------|-----------------------------------------------|---------------------|-----------------|
| <b>SARS-CoV-2-Wuhan-Hu-1_spike/1-1273</b> | VFAQVK   | - - - - -                         | Q I Y K T P P I K D F G G F N F               | S Q I L - P D - - - | P S K P S K R S |
| <i>RATG13/1-1270</i>                      | VFAQVK   | - - - - -                         | Q I Y K T P P I K D F G G F N F               | S Q I L - P D - - - | P S K P S K R S |
| <i>ZXC21/1-1246</i>                       | VFAQVK   | - - - - -                         | Q I Y K T P P I K D F G G F N F               | S Q I L - P D - - - | P S K P S K R S |
| <i>MP789/1-1266</i>                       | VFAQVK   | - - - - -                         | Q I Y K T P P I K D F G G F N F               | S Q I L - P D - - - | P S K P S K R S |
| <i>YN02/1-704</i>                         | VFAQVK   | - - - - -                         | Q I Y K A P V I K D L G G F N F               | S Q L L - P D - - - | P T K P S Q R S |
| <i>GX-P2V/1-1270</i>                      | VFAQVK   | - - - - -                         | Q I Y K T P P I K D F G G F N F               | L Q I L - P D - - - | P S K P S K R S |
| <i>GX-P1E/1-1266</i>                      | VFAQVK   | - - - - -                         | Q I Y K T P P I K D F G G F N F               | S Q I L - P D - - - | P S K P S K R S |
| <i>GX-P5E/1-1268</i>                      | VFAQVK   | - - - - -                         | Q I Y K T P P I K D F G G F N F               | S Q I L - P D - - - | P S K P S K R S |
| <i>GX-P4L/1-1268</i>                      | VFAQVK   | - - - - -                         | Q I Y K T P P I K D F G G F N F               | S Q I L - P D - - - | P S K P S K R S |
| <i>GX-P5L/1-1268</i>                      | VFAQVK   | - - - - -                         | Q I Y K T P P I K D F G G F N F               | S Q I L - P D - - - | P S K P S K R S |
| <i>Chicken/1-1154</i>                     | FYSSTK   | P A - G F N - - T P V L S N V S T | G E F N I S L L L T T P - - -                 | - - - -             | S S P R R S     |
| <i>Duck/1-1192</i>                        | FVEAINTG | Y S L N - - F S S F N S S N L     | G G F N L S L V L P N S - - -                 | - - - -             | A K P S G R S   |
| <i>Turkey/1-1227</i>                      | YAEAINTG | Y T L N - - F T G Y N V S N L     | G G F D L S L V L P K N - L T L A Q N Q G R S |                     |                 |

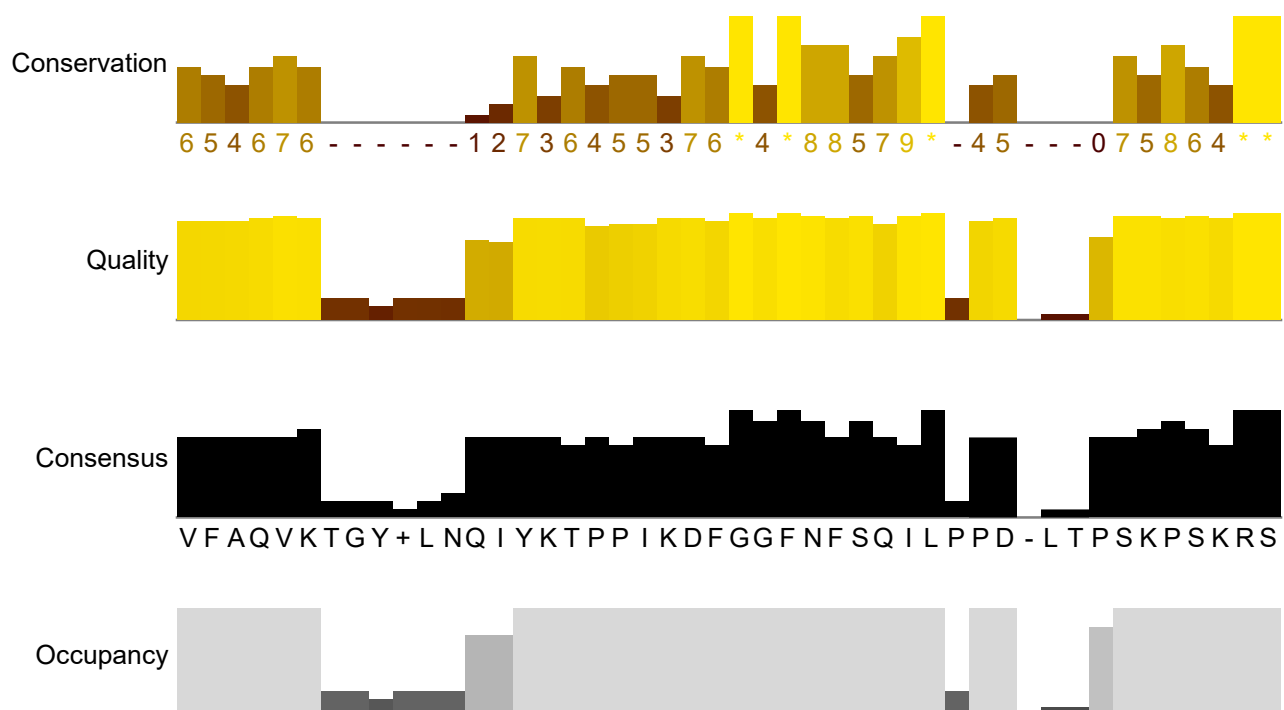

|                                           | 818I                                                                                        | 828L | 837Y | 844- | 852A |
|-------------------------------------------|---------------------------------------------------------------------------------------------|------|------|------|------|
| <b>SARS-CoV-2-Wuhan-Hu-1_spike/1-1273</b> | F I E D L L F N K V T L A D A G F I - K Q Y G D C L - - G D - - - I A A R D L I C A Q K F N |      |      |      |      |
| <i>RATG13/1-1270</i>                      | F I E D L L F N K V T L A D A G F I - K Q Y G D C L - - G D - - - I A A R D L I C A Q K F N |      |      |      |      |
| <i>ZXC21/1-1246</i>                       | F I E D L L F N K V T L A D A G F I - K Q Y G D C L - - G D - - - I S A R D L I C A Q K F N |      |      |      |      |
| <i>MP789/1-1266</i>                       | F I E D L L F N K V T L A D A G F I - K Q Y G D C L - - G D - - - I A A R D L I C A Q K F N |      |      |      |      |
| <i>YN02/1-704</i>                         | F I E D L L F D K V T L S D A G F I - K Q Y G D C L - - G D - - - I A A R D L I C A Q K F N |      |      |      |      |
| <i>GX-P2V/1-1270</i>                      | F I E D L L F N K V T L A D A G F I - K Q Y G D C L - - G D - - - I A A R D L I C A Q K F N |      |      |      |      |
| <i>GX-P1E/1-1266</i>                      | F I E D L L F N K V T L A D A G F I - K Q Y G D C L - - G D - - - I A A R D L I C A Q K F N |      |      |      |      |
| <i>GX-P5E/1-1268</i>                      | F I E D L L F N K V T L A D A G F I - K Q Y G D C L - - G D - - - I A A R D L I C A Q K F N |      |      |      |      |
| <i>GX-P4L/1-1268</i>                      | F I E D L L F N K V T L A D A G F I - K Q Y G D C L - - G D - - - I A A R D L I C A Q K F N |      |      |      |      |
| <i>GX-P5L/1-1268</i>                      | F I E D L L F N K V T L A D A G F I - K Q Y G D C L - - G D - - - I A A R D L I C A Q K F N |      |      |      |      |
| <i>Chicken/1-1154</i>                     | F I E D L L F T S V E S V G L P T D - D A Y K N C T A - - G P L G F L K D L A C A R E Y N   |      |      |      |      |
| <i>Duck/1-1192</i>                        | F I E D L L F D K V V T V G V G E V D A N Y D K C M D S R G G K F T N A A D L T C A Q F Y N |      |      |      |      |
| <i>Turkey/1-1227</i>                      | T I E D L L F D K V V T L G V S E V D Q N Y D K C I A S R G G S F T N L A D L T C A Q F Y N |      |      |      |      |

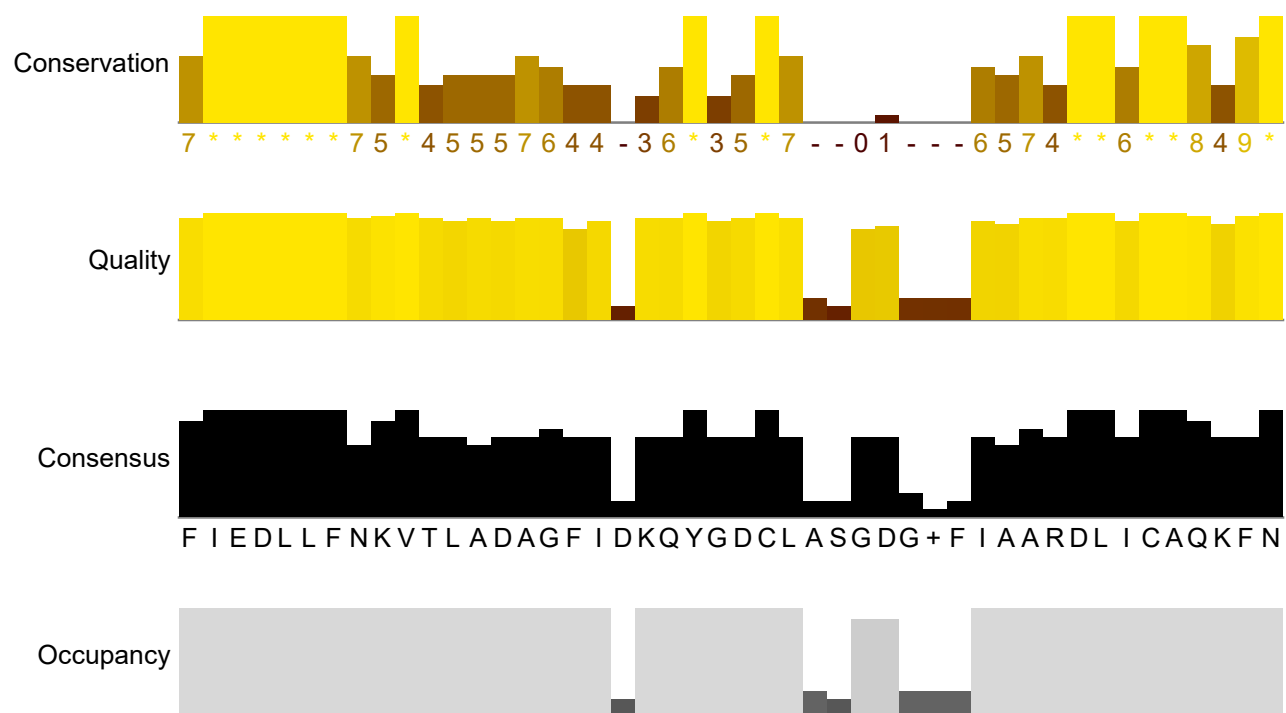



|                                           | 912T                                                                       | 922L | 932G | 936- |
|-------------------------------------------|----------------------------------------------------------------------------|------|------|------|
| <b>SARS-CoV-2-Wuhan-Hu-1_spike/1-1273</b> | AYRFGNGIGVTQNVLYENQKL IANQFN SAIGKIQ                                       |      |      |      |
| <i>RATG13/1-1270</i>                      | AYRFGNGIGVTQNVLYENQKL IANQFN SAIGKIQ                                       |      |      |      |
| <i>ZXC21/1-1246</i>                       | AYRFGNGIGVTQNVLYENQKL IANQFN SAIGKIQ                                       |      |      |      |
| <i>MP789/1-1266</i>                       | AYRFGNGIGVTQNVLYENQKL IANQFN SAIGKIQ                                       |      |      |      |
| <i>YN02/1-704</i>                         | AYRFGNGIGVTQNVLYENQKL IANQFN SAIGKIQ                                       |      |      |      |
| <i>GX-P2V/1-1270</i>                      | AYRFGNGIGVTQNVLYENQKL IANQFN SAIGKIQ                                       |      |      |      |
| <i>GX-P1E/1-1266</i>                      | AYRFGNGIGVTQNVLYENQKL IANQFN SAIGKIQ                                       |      |      |      |
| <i>GX-P5E/1-1268</i>                      | AYRFGNGIGVTQNVLYENQKL IANQFN SAIGKIQ                                       |      |      |      |
| <i>GX-P4L/1-1268</i>                      | AYRFGNGIGVTQNVLYENQKL IANQFN SAIGKIQ                                       |      |      |      |
| <i>GX-P5L/1-1268</i>                      | AYRFGNGIGVTQNVLYENQKL IANQFN SAIGKIQ                                       |      |      |      |
| <i>Chicken/1-1154</i>                     | QARINHLGITQSL LKNQE K I A A S F N K A I G R M Q                            |      |      |      |
| <i>Duck/1-1192</i>                        | QARINYLAL TQSV L L DNQNL I ANS F N N A L E K I Q S A L D V V S A G F Q E V |      |      |      |
| <i>Turkey/1-1227</i>                      | QARVNYLAL TQSV L L DNQNL I ANS F N K A L K G I Q S A L D T V S Q G F V E V |      |      |      |

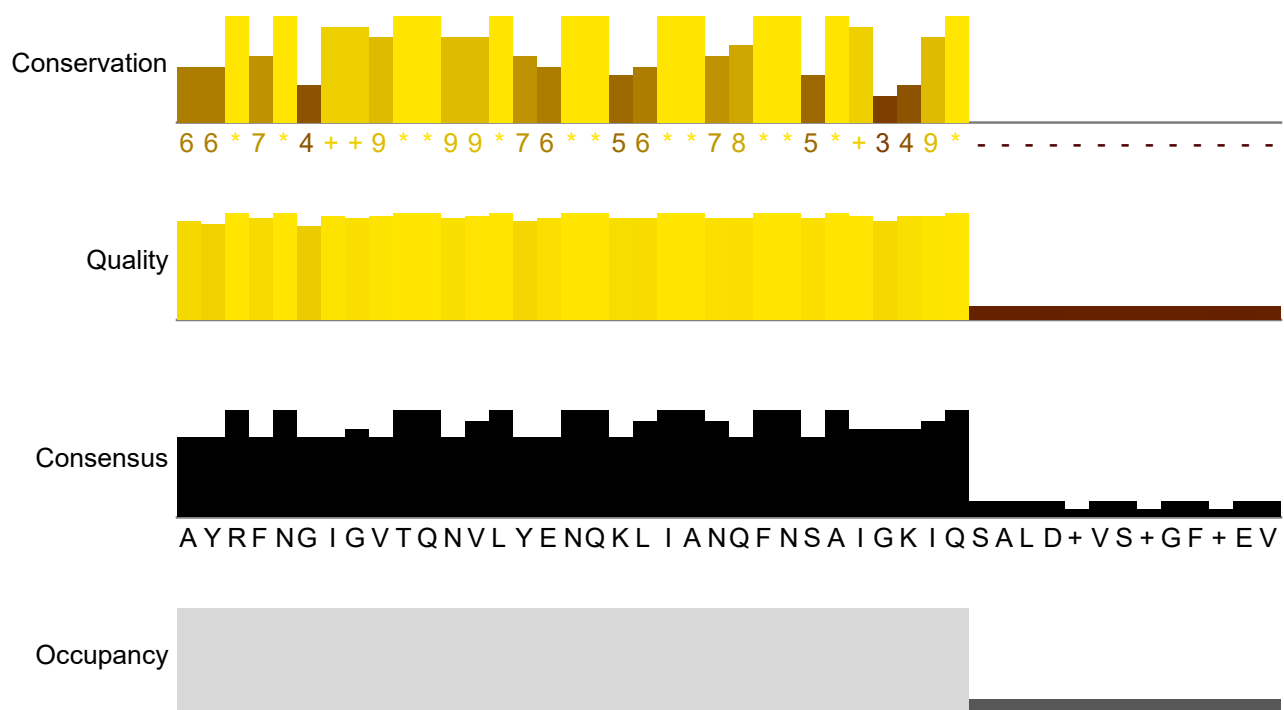

|                                           |   | 938L |   |   |   | 948L |   |   | 958A |   |   | 968S |   |   | 978N |   |   |   |   |   |   |   |   |   |   |   |   |   |   |   |   |   |   |   |   |   |   |   |   |   |   |   |   |   |
|-------------------------------------------|---|------|---|---|---|------|---|---|------|---|---|------|---|---|------|---|---|---|---|---|---|---|---|---|---|---|---|---|---|---|---|---|---|---|---|---|---|---|---|---|---|---|---|---|
| <b>SARS-CoV-2-Wuhan-Hu-1_spike/1-1273</b> | - | DSL  | S | S | T | A    | S | A | L    | G | K | L    | Q | D | V    | V | N | Q | N | A | Q | A | L | N | T | L | V | K | Q | L | S | S | N | F | G | A | I | S | S | V | L | N | D | I |
| <i>RATG13/1-1270</i>                      | - | DSL  | S | S | T | A    | S | A | L    | G | K | L    | Q | D | V    | V | N | Q | N | A | Q | A | L | N | T | L | V | K | Q | L | S | S | N | F | G | A | I | S | S | V | L | N | D | I |
| <i>ZXC21/1-1246</i>                       | - | ESL  | T | S | T | A    | S | A | L    | G | K | L    | Q | D | V    | V | N | Q | N | A | Q | A | L | N | T | L | V | K | Q | L | S | S | N | F | G | A | I | S | S | V | L | N | D | I |
| <i>MP789/1-1266</i>                       | - | DSL  | S | S | T | A    | S | A | L    | G | K | L    | Q | D | V    | V | N | Q | N | A | Q | A | L | N | T | L | V | K | Q | L | S | S | N | F | G | A | I | S | S | V | L | N | D | I |
| <i>YN02/1-704</i>                         | - | DSL  | S | S | T | A    | S | A | L    | G | K | L    | Q | D | V    | V | N | Q | N | A | Q | A | L | N | T | L | V | K | Q | L | S | S | N | F | G | A | I | S | S | V | L | N | D | I |
| <i>GX-P2V/1-1270</i>                      | - | DSL  | S | S | T | A    | S | A | L    | G | K | L    | Q | D | V    | V | N | Q | N | A | Q | A | L | N | T | L | V | K | Q | L | S | S | N | F | G | A | I | S | S | V | L | N | D | I |
| <i>GX-P1E/1-1266</i>                      | - | DSL  | S | S | T | A    | S | A | L    | G | K | L    | Q | D | V    | V | N | Q | N | A | Q | A | L | N | T | L | V | K | Q | L | S | S | N | F | G | A | I | S | S | V | L | N | D | I |
| <i>GX-P5E/1-1268</i>                      | - | DSL  | S | S | T | A    | S | A | L    | G | K | L    | Q | D | V    | V | N | Q | N | A | Q | A | L | N | T | L | V | K | Q | L | S | S | N | F | G | A | I | S | S | V | L | N | D | I |
| <i>GX-P4L/1-1268</i>                      | - | DSL  | S | S | T | A    | S | A | L    | G | K | L    | Q | D | V    | V | N | Q | N | A | Q | A | L | N | T | L | V | K | Q | L | S | S | N | F | G | A | I | S | S | V | L | N | D | I |
| <i>GX-P5L/1-1268</i>                      | - | DSL  | S | S | T | A    | S | A | L    | G | K | L    | Q | D | V    | V | N | Q | N | A | Q | A | L | N | T | L | V | K | Q | L | S | S | N | F | G | A | I | S | S | V | L | N | D | I |
| <i>Chicken/1-1154</i>                     | - | EGFR | S | T | S | L    | A | L | Q    | Q | I | Q    | D | V | V    | N | K | Q | S | A | I | L | T | E | T | M | A | S | L | I | K | N | F | G | A | I | S | T | M | I | Q | E | I |   |
| <i>Duck/1-1192</i>                        |   | AKGF | E | T | V | S    | V | A | L    | S | K | V    | Q | D | V    | V | N | S | H | S | E | I | L | N | K | L | M | A | Q | L | N | V | N | F | G | A | I | S | S | S | L | S | D | I |
| <i>Turkey/1-1227</i>                      |   | ARGF | E | S | V | T    | V | A | L    | N | K | V    | Q | D | V    | V | N | T | H | S | D | I | L | N | K | L | M | A | Q | L | S | V | N | F | G | A | V | S | S | S | L | N | E | I |

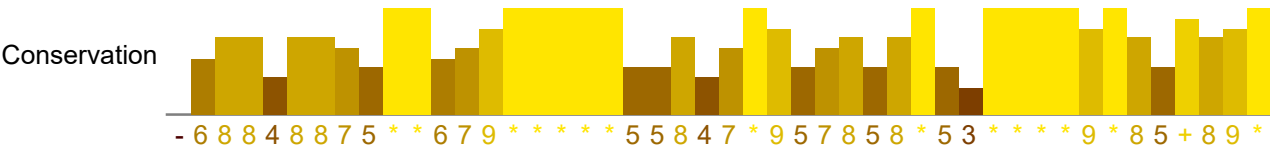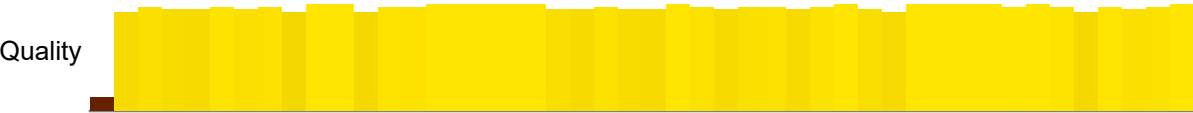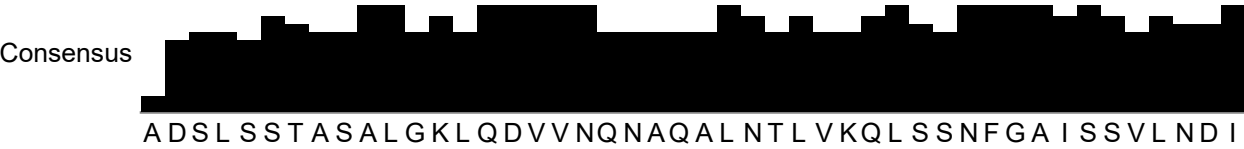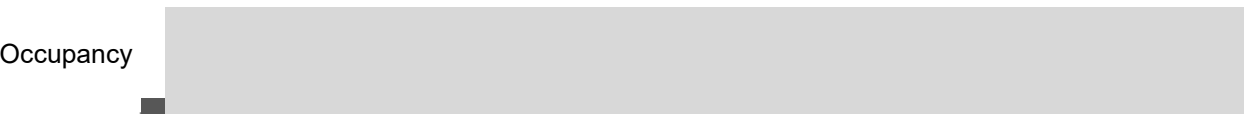

|                                           |   | 988E | 998T | 1008V | 1018I |   |   |   |   |   |   |   |   |   |   |   |   |   |   |   |   |   |   |   |   |   |   |   |   |   |   |   |   |   |   |   |   |   |   |   |   |   |   |   |   |   |
|-------------------------------------------|---|------|------|-------|-------|---|---|---|---|---|---|---|---|---|---|---|---|---|---|---|---|---|---|---|---|---|---|---|---|---|---|---|---|---|---|---|---|---|---|---|---|---|---|---|---|---|
| <b>SARS-CoV-2-Wuhan-Hu-1_spike/1-1273</b> | L | S    | R    | L     | D     | K | V | E | A | E | V | Q | I | D | R | L | I | T | G | R | L | Q | S | L | Q | T | Y | V | T | Q | Q | L | I | R | A | A | E | I | R | A | S | A | N | L | A | A |
| <i>RATG13/1-1270</i>                      | L | S    | R    | L     | D     | K | V | E | A | E | V | Q | I | D | R | L | I | T | G | R | L | Q | S | L | Q | T | Y | V | T | Q | Q | L | I | R | A | A | E | I | R | A | S | A | N | L | A | A |
| <i>ZXC21/1-1246</i>                       | L | S    | R    | L     | D     | K | V | E | A | E | V | Q | I | D | R | L | I | T | G | R | L | Q | S | L | Q | T | Y | V | T | Q | Q | L | I | R | A | A | E | I | R | A | S | A | N | L | A | A |
| <i>MP789/1-1266</i>                       | L | S    | R    | L     | D     | K | V | E | A | E | V | Q | I | D | R | L | I | T | G | R | L | Q | S | L | Q | T | Y | V | T | Q | Q | L | I | R | A | A | E | I | R | A | S | A | N | L | A | A |
| <i>YN02/1-704</i>                         | L | S    | R    | L     | D     | K | V | E | A | E | V | Q | I | D | R | L | I | T | G | R | L | Q | S | L | Q | T | Y | V | T | Q | Q | L | I | R | A | A | E | I | R | A | S | A | N | L | A | A |
| <i>GX-P2V/1-1270</i>                      | L | S    | R    | L     | D     | K | V | E | A | E | V | Q | I | D | R | L | I | T | G | R | L | Q | S | L | Q | T | Y | V | T | Q | Q | L | I | R | A | A | E | I | R | A | S | A | N | L | A | A |
| <i>GX-P1E/1-1266</i>                      | L | S    | R    | L     | D     | K | V | E | A | E | V | Q | I | D | R | L | I | T | G | R | L | Q | S | L | Q | T | Y | V | T | Q | Q | L | I | R | A | A | E | I | R | A | S | A | N | L | A | A |
| <i>GX-P5E/1-1268</i>                      | L | S    | R    | L     | D     | K | V | E | A | E | V | Q | I | D | R | L | I | T | G | R | L | Q | S | L | Q | T | Y | V | T | Q | Q | L | I | R | A | A | E | I | R | A | S | A | N | L | A | A |
| <i>GX-P4L/1-1268</i>                      | L | S    | R    | L     | D     | K | V | E | A | E | V | Q | I | D | R | L | I | T | G | R | L | Q | S | L | Q | T | Y | V | T | Q | Q | L | I | R | A | A | E | I | R | A | S | A | N | L | A | A |
| <i>GX-P5L/1-1268</i>                      | L | S    | R    | L     | D     | K | V | E | A | E | V | Q | I | D | R | L | I | T | G | R | L | Q | S | L | Q | T | Y | V | T | Q | Q | L | I | R | A | A | E | I | R | A | S | A | N | L | A | A |
| <i>Chicken/1-1154</i>                     | Y | Q    | Q    | F     | D     | A | I | Q | A | N | A | Q | V | D | R | L | I | T | G | R | L | S | S | L | S | V | L | A | S | A | K | Q | A | E | H | I | R | V | S | Q | Q | R | E | L | A | T |
| <i>Duck/1-1192</i>                        | Y | S    | Q    | L     | D     | E | L | N | A | N | A | Q | V | D | R | L | I | T | G | R | L | T | A | L | S | T | Y | A | A | S | L | Q | L | A | A | Y | K | A | E | E | S | R | K | L | A | L |
| <i>Turkey/1-1227</i>                      | Y | L    | K    | L     | D     | Q | I | N | A | D | A | Q | V | D | R | L | I | T | G | R | L | T | A | L | S | T | Y | V | A | S | L | Q | L | A | A | Y | K | A | D | Q | S | R | R | L | A | L |

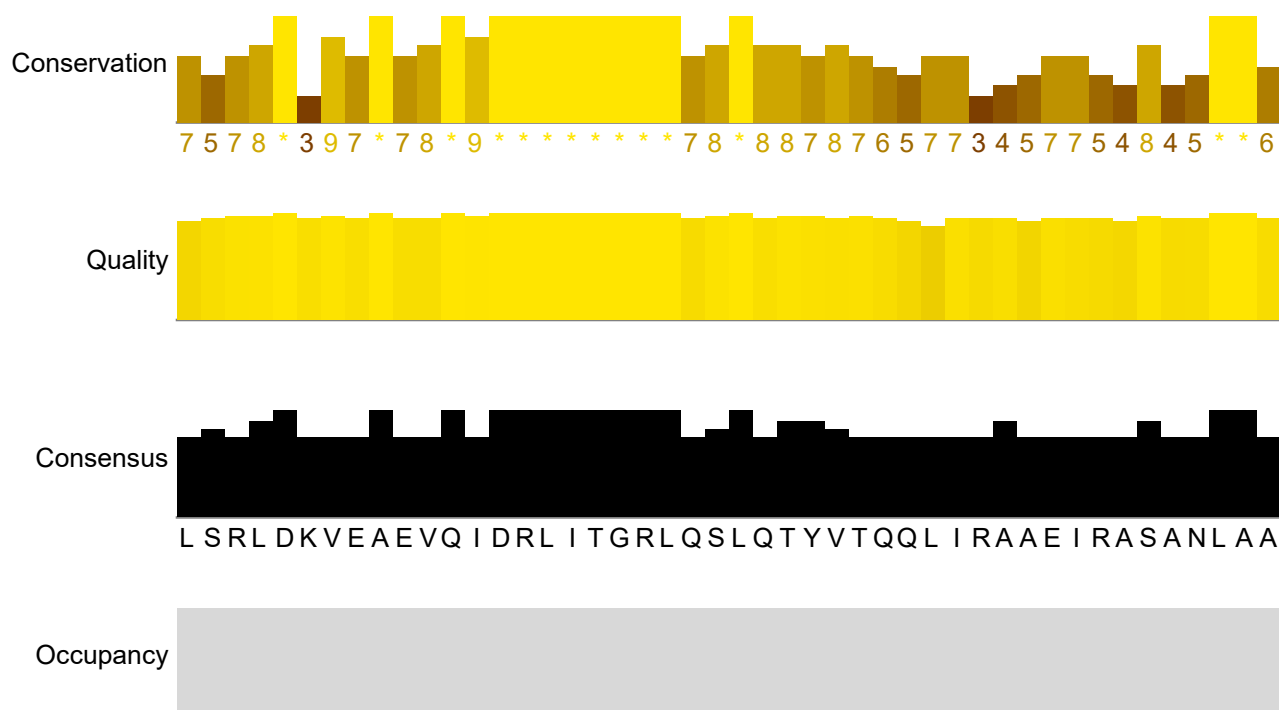



|                                           | 1028K | 1038K | 1048H | 1058H | 1068V |   |   |   |   |   |   |   |   |   |   |   |   |   |   |   |   |   |   |   |   |   |   |   |   |   |   |   |   |   |   |   |   |   |   |   |   |   |   |   |   |   |
|-------------------------------------------|-------|-------|-------|-------|-------|---|---|---|---|---|---|---|---|---|---|---|---|---|---|---|---|---|---|---|---|---|---|---|---|---|---|---|---|---|---|---|---|---|---|---|---|---|---|---|---|---|
| <b>SARS-CoV-2-Wuhan-Hu-1_spike/1-1273</b> | T     | K     | M     | S     | E     | C | V | L | G | Q | S | K | R | V | D | F | C | G | K | G | Y | H | L | M | S | F | P | Q | S | A | P | H | G | V | V | F | L | H | V | T | Y | V | P | A | Q | E |
| <i>RATG13/1-1270</i>                      | T     | K     | M     | S     | E     | C | V | L | G | Q | S | K | R | V | D | F | C | G | K | G | Y | H | L | M | S | F | P | Q | S | A | P | H | G | V | V | F | L | H | V | T | Y | V | P | A | Q | E |
| <i>ZXC21/1-1246</i>                       | T     | K     | M     | S     | E     | C | V | L | G | Q | S | K | R | V | D | F | C | G | K | G | Y | H | L | M | S | F | P | Q | S | A | P | H | G | V | V | F | L | H | V | T | Y | I | P | S | Q | E |
| <i>MP789/1-1266</i>                       | T     | K     | M     | S     | E     | C | V | L | G | Q | S | K | R | V | D | F | C | G | K | G | Y | H | L | M | S | F | P | Q | S | A | P | H | G | V | V | F | L | H | V | T | Y | V | P | S | Q | E |
| <i>YN02/1-704</i>                         | T     | K     | M     | S     | E     | C | V | L | G | Q | S | K | R | V | D | F | C | G | K | G | Y | H | L | M | S | F | P | Q | S | A | P | H | G | V | V | F | L | H | V | T | Y | V | P | A | Q | E |
| <i>GX-P2V/1-1270</i>                      | T     | K     | M     | S     | E     | C | V | L | G | Q | S | K | R | V | D | F | C | G | K | G | Y | H | L | M | S | F | P | Q | S | A | P | H | G | V | V | F | L | H | V | T | Y | V | P | A | Q | E |
| <i>GX-P1E/1-1266</i>                      | T     | K     | M     | S     | E     | C | V | L | G | Q | S | K | R | V | D | F | C | G | K | G | Y | H | L | M | S | F | P | Q | S | A | P | H | G | V | V | F | L | H | V | T | Y | V | P | A | Q | E |
| <i>GX-P5E/1-1268</i>                      | T     | K     | M     | S     | E     | C | V | L | G | Q | S | K | R | V | D | F | C | G | K | G | Y | H | L | M | S | F | P | Q | S | A | P | H | G | V | V | F | L | H | V | T | Y | V | P | A | Q | E |
| <i>GX-P4L/1-1268</i>                      | T     | K     | M     | S     | E     | C | V | L | G | Q | S | K | R | V | D | F | C | G | K | G | Y | H | L | M | S | F | P | Q | S | A | P | H | G | V | V | F | L | H | V | T | Y | V | P | A | Q | E |
| <i>GX-P5L/1-1268</i>                      | T     | K     | M     | S     | E     | C | V | L | G | Q | S | K | R | V | D | F | C | G | K | G | Y | H | L | M | S | F | P | Q | S | A | P | H | G | V | V | F | L | H | V | T | Y | V | P | A | Q | E |
| <i>Chicken/1-1154</i>                     | Q     | K     | I     | N     | E     | C | V | K | S | Q | S | N | R | Y | S | F | C | G | N | G | R | H | V | L | T | I | P | Q | N | A | P | N | G | I | V | F | I | H | F | S | Y | T | P | D | S | F |
| <i>Duck/1-1192</i>                        | Q     | K     | V     | E     | E     | C | V | K | S | Q | S | M | R | Y | G | F | C | G | N | G | S | H | V | L | T | I | P | Q | T | A | P | N | G | M | F | F | I | H | Y | T | Y | P | P | A | S | Y |
| <i>Turkey/1-1227</i>                      | Q     | K     | V     | E     | E     | C | V | K | S | Q | S | M | R | Y | G | F | C | G | N | G | S | H | V | L | T | I | P | Q | S | A | P | N | G | I | F | F | I | H | Y | T | Y | Q | P | T | S | Y |

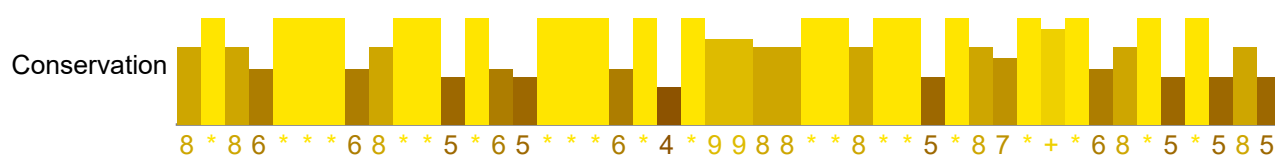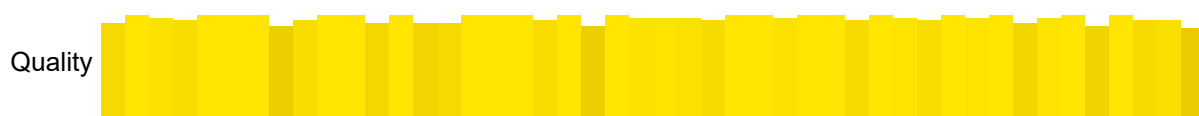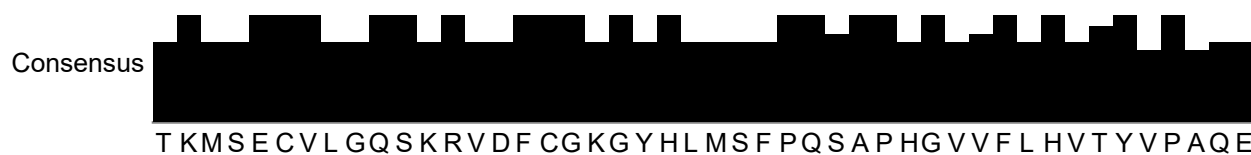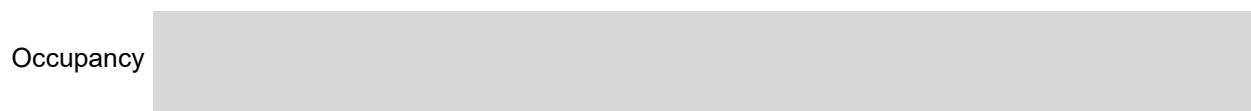



|                                           |                                                                                             | 1118D | 1128V | 1138Y | 1146D |
|-------------------------------------------|---------------------------------------------------------------------------------------------|-------|-------|-------|-------|
| <b>SARS-CoV-2-Wuhan-Hu-1_spike/1-1273</b> | FYEPQ I I T T D N T F V S G N C D V V I G I V N N T V Y D P L Q - - P E L D S F K - - -     |       |       |       |       |
| <i>RATG13/1-1270</i>                      | FYEPQ I I T T D N T F V S G S C D V V I G I V N N T V Y D P L Q - - P E L D S F K - - -     |       |       |       |       |
| <i>ZXC21/1-1246</i>                       | FYEPQ I I T T D N T F V S G N C D V V I G I I N N T V Y D P L Q - - P E L D S F K - - -     |       |       |       |       |
| <i>MP789/1-1266</i>                       | FYEPQ I I T T D N T F V S G S C D V V I G I V N N T V Y D P L Q - - P E L D S F K - - -     |       |       |       |       |
| <i>YN02/1-704</i>                         | FYEPQ I I T T D N T F V S G S C D V V I G I V N N T V Y D P L Q - - P E L D S F K - - -     |       |       |       |       |
| <i>GX-P2V/1-1270</i>                      | FYEPQ I I T T D N T F V S G S C D V V I G I V N N T V Y D P L Q - - P E L D S F K - - -     |       |       |       |       |
| <i>GX-P1E/1-1266</i>                      | FYEPQ I I T T D N T F V S G S C D V V I G I V N N T V Y D P L Q - - P E L D S F K - - -     |       |       |       |       |
| <i>GX-P5E/1-1268</i>                      | FYEPQ I I T T D N T F V S G S C D V V I G I V N N T V Y D P L Q - - P E L D S F K - - -     |       |       |       |       |
| <i>GX-P4L/1-1268</i>                      | FYEPQ I I T T D N T F V S G S C D V V I G I V N N T V Y D P L Q - - P E L D S F K - - -     |       |       |       |       |
| <i>GX-P5L/1-1268</i>                      | FYEPQ I I T T D N T F V S G S C D V V I G I V N N T V Y D P L Q - - P E L D S F K - - -     |       |       |       |       |
| <i>Chicken/1-1154</i>                     | M Y M P R A I T A G D I V T L T S C Q A N Y V S V N K T V I T T - - - F V D N D D F D F     |       |       |       |       |
| <i>Duck/1-1192</i>                        | L Y Q P K L L S Y S D V V N L T S C E A N Y Y N V S Q D E T P F Q - - - P E L P S F D D E F |       |       |       |       |
| <i>Turkey/1-1227</i>                      | L Y E P K L L S Y S E V V N L T S C E A N Y Y N V S E S E T P F Q - - - P A L P N F D D E F |       |       |       |       |

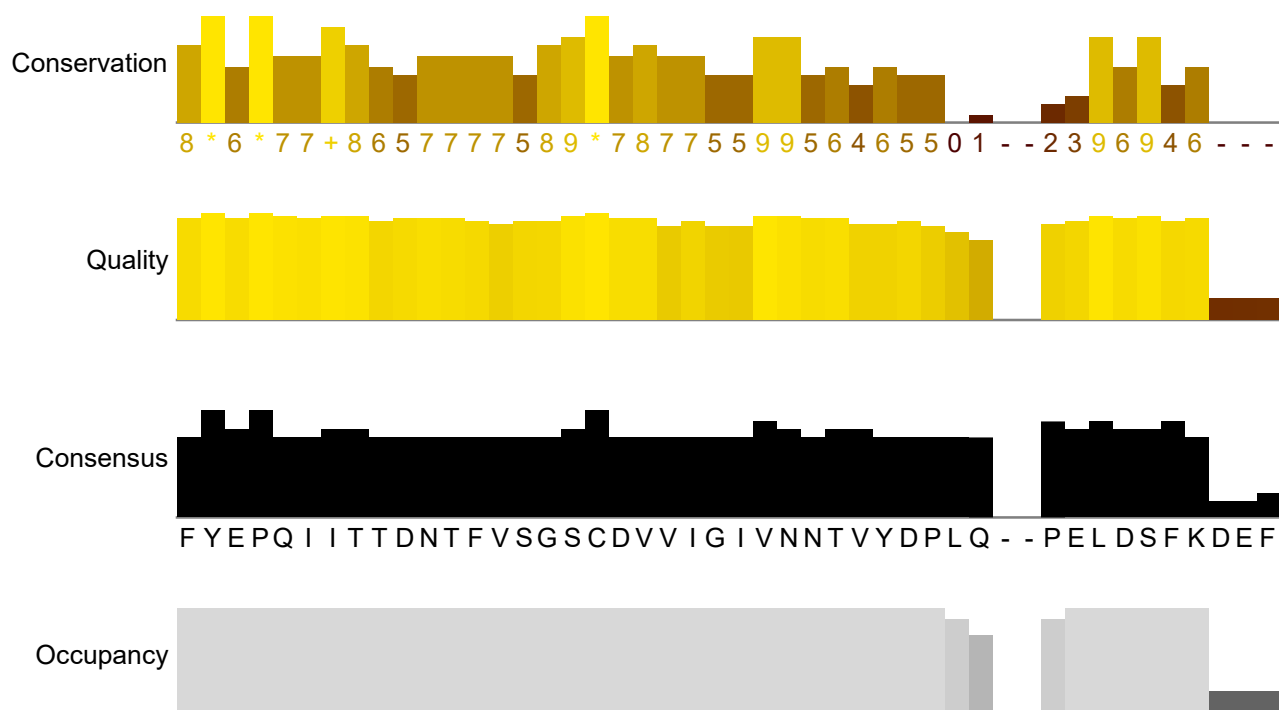

|                                           |   | 1152L               |      |                    | 1162P |                    | 1172I |    |       | 1182E   |    | 1188- |
|-------------------------------------------|---|---------------------|------|--------------------|-------|--------------------|-------|----|-------|---------|----|-------|
| <b>SARS-CoV-2-Wuhan-Hu-1_spike/1-1273</b> | - | EELDKYFKNHTSPDVDLGD | I    | SGINASVVNIQKEIDRLN | -     | -                  | -     | -  | -     | -       | -  | -     |
| <i>RATG13/1-1270</i>                      | - | EELDKYFKNHTSPDVDLGD | I    | SGINASVVNIQKEIDRLN | -     | -                  | -     | -  | -     | -       | -  | -     |
| <i>ZXC21/1-1246</i>                       | - | EELDKYFKNHTSPD      | I    | DLGD               | I     | SGINASVVNIQKEIDRLN | -     | -  | -     | -       | -  | -     |
| <i>MP789/1-1266</i>                       | - | EELDKYFKNHTSPDVDLGD | I    | SGINASVVNIQKEIDRLN | -     | -                  | -     | -  | -     | -       | -  | -     |
| <i>YN02/1-704</i>                         | - | EELDKYFKNHTSPDVDLGD | I    | SGINASVVNIQKEIDRLN | -     | -                  | -     | -  | -     | -       | -  | -     |
| <i>GX-P2V/1-1270</i>                      | - | EELDKYFKNHTSPDVDLGD | I    | SGINASVVNIQKEIDRLN | -     | -                  | -     | -  | -     | -       | -  | -     |
| <i>GX-P1E/1-1266</i>                      | - | EELDKYFKNHTSPDVDLGD | I    | SGINASVVNIQKEIDRLN | -     | -                  | -     | -  | -     | -       | -  | -     |
| <i>GX-P5E/1-1268</i>                      | - | EELDKYFKNHTSPDVDLGD | I    | SGINASVVNIQKEIDRLN | -     | -                  | -     | -  | -     | -       | -  | -     |
| <i>GX-P4L/1-1268</i>                      | - | EELDKYFKNHTSPDVDLGD | I    | SGINASVVNIQKEIDRLN | -     | -                  | -     | -  | -     | -       | -  | -     |
| <i>GX-P5L/1-1268</i>                      | - | EELDKYFKNHTSPDVDLGD | I    | SGINASVVNIQKEIDRLN | -     | -                  | -     | -  | -     | -       | -  | -     |
| <i>Chicken/1-1154</i>                     |   | NDEL                | SK   | -WWNATKH           | ELPDF | DKFNYTVP           | IL    | D  | IDE   | SEIDRIQ | -  | -     |
| <i>Duck/1-1192</i>                        |   | DN                  | IYTE | -LNTSKDL           | IDS   | IYKDFNYT           | IP    | IL | NLEDD | ICRLN   | SS | INALW |
| <i>Turkey/1-1227</i>                      |   | ND                  | IFTE | -LNTSKDA           | IKN   | ISSNFNYT           | IP    | IL | NLEDE | ICRLN   | HS | INTLY |

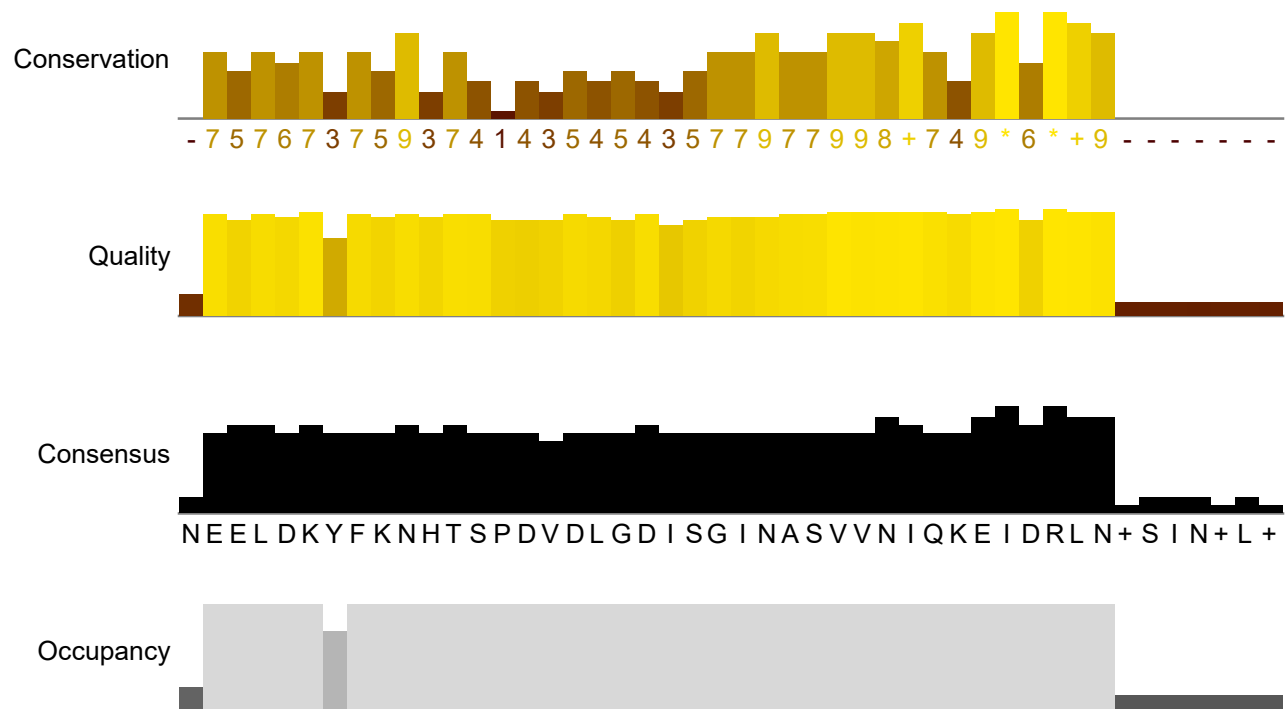



|                                           |   | 1228V |   |   |   |   | 1238T |   |   |   |   | 1248- |   |   |   | 1251G |   |   |   | 1260D |   |   |   |   |   |   |   |   |   |   |   |   |   |   |   |   |   |   |   |   |   |   |   |   |   |   |
|-------------------------------------------|---|-------|---|---|---|---|-------|---|---|---|---|-------|---|---|---|-------|---|---|---|-------|---|---|---|---|---|---|---|---|---|---|---|---|---|---|---|---|---|---|---|---|---|---|---|---|---|---|
| <b>SARS-CoV-2-Wuhan-Hu-1_spike/1-1273</b> | I | V     | M | V | T | I | M     | L | C | C | M | T     | S | C | C | S     | C | L | K | G     | C | - | - | - | - | - | - | C | S | C | G | S | C | C | K | - | F | D | E | D | D | S | E | P | V |   |
| <i>RATG13/1-1270</i>                      | I | I     | M | V | T | I | M     | L | C | C | M | T     | S | C | C | S     | C | L | K | G     | C | - | - | - | - | - | - | C | S | C | G | S | C | C | K | - | F | D | E | D | D | S | E | P | V |   |
| <i>ZXC21/1-1246</i>                       | I | V     | M | V | T | I | L     | L | C | C | M | T     | S | C | C | S     | C | L | K | G     | C | - | - | - | - | - | - | C | S | C | G | F | C | C | K | - | F | D | E | D | D | S | E | P | V |   |
| <i>MP789/1-1266</i>                       | I | I     | M | V | T | I | M     | L | C | C | M | T     | S | C | C | S     | C | L | K | G     | C | - | - | - | - | - | - | C | S | C | G | S | C | C | K | - | F | D | E | D | D | S | E | P | V |   |
| <i>YN02/1-704</i>                         | I | I     | M | V | T | I | M     | L | C | C | M | T     | S | C | C | S     | C | L | K | G     | C | - | - | - | - | - | - | C | S | C | G | S | C | C | K | - | F | D | E | D | D | S | E | P | V |   |
| <i>GX-P2V/1-1270</i>                      | I | I     | M | V | T | I | M     | L | C | C | M | T     | S | C | C | S     | C | L | K | G     | C | - | - | - | - | - | - | C | S | C | G | S | C | C | K | - | F | D | E | D | D | S | E | P | V |   |
| <i>GX-P1E/1-1266</i>                      | I | I     | M | V | T | I | M     | L | C | C | M | T     | S | C | C | S     | C | L | K | G     | C | - | - | - | - | - | - | C | S | C | G | S | C | C | K | - | F | D | E | D | D | S | E | P | V |   |
| <i>GX-P5E/1-1268</i>                      | I | I     | M | V | T | I | M     | L | C | C | M | T     | S | C | C | S     | C | L | K | G     | C | - | - | - | - | - | - | C | S | C | G | S | C | C | K | - | F | D | E | D | D | S | E | P | V |   |
| <i>GX-P4L/1-1268</i>                      | I | I     | M | V | T | I | M     | L | C | C | M | T     | S | C | C | S     | C | L | K | G     | C | - | - | - | - | - | - | C | S | C | G | S | C | C | K | - | F | D | E | D | D | S | E | P | V |   |
| <i>GX-P5L/1-1268</i>                      | I | I     | M | V | T | I | M     | L | C | C | M | T     | S | C | C | S     | C | L | K | G     | C | - | - | - | - | - | - | C | S | C | G | S | C | C | K | - | F | D | E | D | D | S | E | P | V |   |
| <i>Chicken/1-1154</i>                     | F | I     | L | I | L | G | W     | V | F | F | M | T     | G | C | C | G     | C | C | G | C     | L | G | I | M | P | L | M | R | K | C | G | K | K | S | S | Y | Y | T | T | F | F | D | N | D | V | V |
| <i>Duck/1-1192</i>                        | F | V     | L | I | L | C | W     | I | F | F | M | T     | G | C | C | G     | C | C | G | C     | F | G | I | I | P | L | M | Y | K | C | S | K | K | S | S | Y | Y | T | T | F | F | D | D | D | V | V |
| <i>Turkey/1-1227</i>                      | F | I     | L | I | L | G | W     | V | F | F | M | T     | G | C | C | G     | C | C | G | C     | F | G | I | I | P | L | M | S | K | C | G | K | K | S | S | Y | Y | T | T | F | F | D | N | D | V | V |

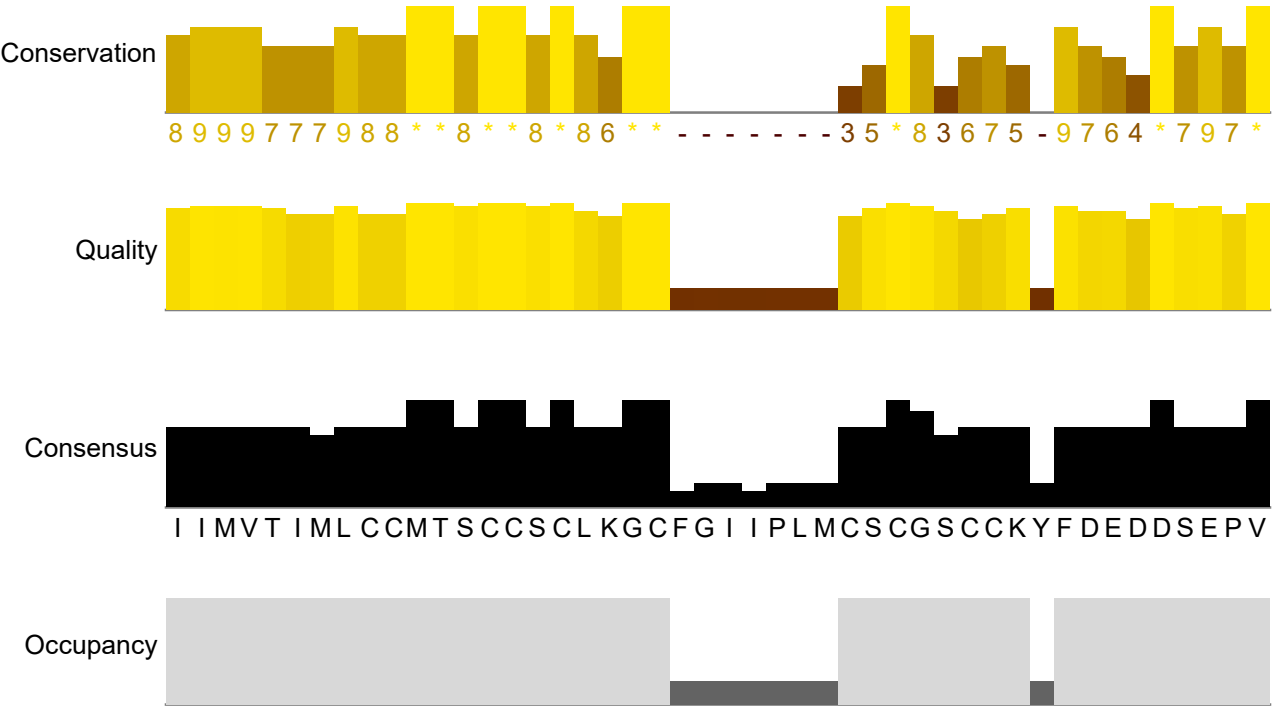

Supplement: Supplementary file 3 [file supplementary]
