# Supplementary material for: An Immunoinformatics Approach for Identifying and Designing Conserved Multi-Epitope Vaccines for Coronaviruses
Source: Preprints.org preprint supplement (doi:10.20944/preprints202409.0239.v1), 2024-09-03
Supplement: Supplementary file 4 [file supplementary]

Supplementary Table 1.0 Final selected HTL epitopes.

| Peptide             | Number of<br>matched HLA<br>class-II alleles<br>(out of 16) | Number of<br>matched<br>coronavirus<br>strains | HLA class-II allele                                                                                                                                                                                                                                                                                                                         | Location in S<br>glycoprotein | Assigned<br>Name |
|---------------------|-------------------------------------------------------------|------------------------------------------------|---------------------------------------------------------------------------------------------------------------------------------------------------------------------------------------------------------------------------------------------------------------------------------------------------------------------------------------------|-------------------------------|------------------|
| WYIWLGFIA<br>GLIAIV | 15                                                          | 23                                             | HLA-DQA1*05:01/DQB1*03:01;HLA-DQA1*01:01/DQB1*05:01;HLA-DRB1*09:01;HLA-DPA1*03:01/DPB1*04:02;HLA-DRB1*01:01;HLA-DQA1*05:01/DQB1*02:01;HLA-DPA1*02:01/DPB1*01:01;HLA-DRB1*07:01;HLA-DPA1*01:03/DPB1*02:01;HLA-DQA1*04:01/DQB1*04:02;HLA-DPA1*01/DPB1*04:01;HLA-DRB3*01:01;HLA-DPA1*02:01/DPB1*05:01;HLA-DQA1*03:01/DQB1*03:02;HLA-DRB4*01:01 | 1214-1228                     | HTL 1            |

|                     |    |    |                                                                                                                                                                                                                                                                                                                              |           |       |
|---------------------|----|----|------------------------------------------------------------------------------------------------------------------------------------------------------------------------------------------------------------------------------------------------------------------------------------------------------------------------------|-----------|-------|
| PWYIWLGF<br>AGLIAI  | 14 | 23 | HLA-DQA1*01:01/DQB1*05:01;HLA-DPA1*01:03/DPB1*02:01;HLA-DQA1*05:01/DQB1*03:01;HLA-DRB1*01:01;HLA-DQA1*05:01/DQB1*02:01;HLA-DPA1*02:01/DPB1*01:01;HLA-DPA1*03:01/DPB1*04:02;HLA-DRB1*07:01;HLA-DPA1*01/DPB1*04:01;HLA-DRB1*09:01;HLA-DPA1*02:01/DPB1*05:01;HLA-DQA1*04:01/DQB1*04:02;HLA-DQA1*03:01/DQB1*03:02;HLA-DRB4*01:01 | 1213-1227 | HTL 2 |
| WLGFIAGLI<br>AIVMVT | 13 | 24 | HLA-DQA1*05:01/DQB1*03:01;HLA-DPA1*03:01/DPB1*04:02;HLA-DRB1*09:01;HLA-DRB1*01:01;HLA-DQA1*04:01/DQB1*04:02;HLA-DQA1*01:01/DQB1*05:01;HLA-DQA1*01:02/DQB1*06:02;HLA-DQA1*05:01/DQB1*02:01;HLA-DPA1*01:03/DPB1*02:01;HLA-DPA1*02:01/DPB1*01:01;HLA-DQA1*03:01/DQB1*03:02;HLA-DRB3*01:01;HLA-DRB1*07:01                        | 1217-1231 | HTL 3 |

|                 |    |    |                                                                                                                                                                                                                                                                                                       |           |       |
|-----------------|----|----|-------------------------------------------------------------------------------------------------------------------------------------------------------------------------------------------------------------------------------------------------------------------------------------------------------|-----------|-------|
| YIWLGFIAGLIAIVM | 13 | 23 | HLA-DQA1*05:01/DQB1*03:01;HLA-DQA1*01:01/DQB1*05:01;HLA-DRB1*01:01;HLA-DRB1*09:01;HLA-DPA1*03:01/DPB1*04:02;HLA-DQA1*05:01/DQB1*02:01;HLA-DQA1*01:02/DQB1*06:02;HLA-DRB1*07:01;HLA-DQA1*04:01/DQB1*04:02;HLA-DPA1*01:03/DPB1*02:01;HLA-DPA1*02:01/DPB1*01:01;HLA-DRB3*01:01;HLA-DQA1*03:01/DQB1*03:02 | 1215-1229 | HTL 4 |
| IWLGFIAGLIAIVMV | 13 | 23 | HLA-DQA1*05:01/DQB1*03:01;HLA-DRB1*01:01;HLA-DRB1*09:01;HLA-DPA1*03:01/DPB1*04:02;HLA-DQA1*01:01/DQB1*05:01;HLA-DQA1*04:01/DQB1*04:02;HLA-DQA1*01:02/DQB1*06:02;HLA-DQA1*05:01/DQB1*02:01;HLA-DPA1*01:03/DPB1*02:01;HLA-DPA1*02:01/DPB1*01:01;HLA-DRB1*07:01;HLA-DRB3*01:01;HLA-DQA1*03:01/DQB1*03:02 | 1216-1230 | HTL 5 |

|                     |    |    |                                                                                                                                                                                                                                                                                        |           |       |
|---------------------|----|----|----------------------------------------------------------------------------------------------------------------------------------------------------------------------------------------------------------------------------------------------------------------------------------------|-----------|-------|
| LGFIAGLIAI<br>VMVTI | 12 | 24 | HLA-DQA1*05:01/DQB1*03:01;HLA-DPA1*03:01/DPB1*04:02;HLA-DQA1*01:02/DQB1*06:02;HLA-DRB1*01:01;HLA-DQA1*05:01/DQB1*02:01;HLA-DRB1*09:01;HLA-DQA1*04:01/DQB1*04:02;HLA-DPA1*02:01/DPB1*01:01;HLA-DQA1*01:01/DQB1*05:01;HLA-DPA1*01:03/DPB1*02:01;HLA-DQA1*03:01/DQB1*03:02;HLA-DRB3*01:01 | 1218-1232 | HTL 6 |
| WPWYIWL<br>GFIAGLIA | 12 | 23 | HLA-DQA1*01:01/DQB1*05:01;HLA-DPA1*01:03/DPB1*02:01;HLA-DQA1*05:01/DQB1*02:01;HLA-DRB1*01:01;HLA-DQA1*05:01/DQB1*03:01;HLA-DPA1*02:01/DPB1*01:01;HLA-DPA1*03:01/DPB1*04:02;HLA-DRB1*07:01;HLA-DPA1*01/DPB1*04:01;HLA-DRB1*09:01;HLA-DPA1*02:01/DPB1*05:01;HLA-DRB4*01:01               | 1212-1226 | HTL 7 |
| GVVFLHVTY<br>VPAQEK | 11 | 24 | HLA-DPA1*01/DPB1*04:01;HLA-DPA1*01:03/DPB1*02:01;HLA-DRB1*01:01;HLA-DQA1*05:01/DQB1*02:01;HLA-DQA1*04:01/DQB1*04:02;HLA-DQA1*03:01/DQB1*03:02;HLA-DRB1*07:01;HLA-DPA1*03:01/DPB1*04:02;HLA-DPA1*02:01/DPB1*01:01;HLA-DQA1*01:02/DQB1*06:02;HLA-DRB4*01:01                              | 1059-1073 | HTL 8 |

|                     |    |    |                                                                                                                                                                                                                                                              |           |        |
|---------------------|----|----|--------------------------------------------------------------------------------------------------------------------------------------------------------------------------------------------------------------------------------------------------------------|-----------|--------|
| VVFLHVTYV<br>PAQEKV | 11 | 24 | HLA-DPA1*01/DPB1*04:01;HLA-DPA1*01:03/DPB1*02:01;HLA-DQA1*04:01/DQB1*04:02;HLA-DQA1*03:01/DQB1*03:02;HLA-DQA1*05:01/DQB1*02:01;HLA-DRB1*01:01;HLA-DRB1*07:01;HLA-DQA1*01:02/DQB1*06:02;HLA-DPA1*02:01/DPB1*01:01;HLA-DPA1*03:01/DPB1*04:02;HLA-DRB4*01:01    | 1060-1074 | HTL 9  |
| GFIAGLIAIV<br>MVTIM | 11 | 23 | HLA-DQA1*05:01/DQB1*03:01;HLA-DPA1*03:01/DPB1*04:02;HLA-DQA1*01:02/DQB1*06:02;HLA-DRB1*01:01;HLA-DQA1*05:01/DQB1*02:01;HLA-DQA1*04:01/DQB1*04:02;HLA-DRB1*09:01;HLA-DPA1*02:01/DPB1*01:01;HLA-DPA1*01:03/DPB1*02:01;HLA-DRB4*01:01;HLA-DQA1*03:01/DQB1*03:02 | 1219-1233 | HTL 10 |
| ADYSVLYNF<br>APFFAF | 11 | 13 | HLA-DRB3*01:01;HLA-DPA1*01:03/DPB1*02:01;HLA-DQA1*01:01/DQB1*05:01;HLA-DPA1*02:01/DPB1*05:01;HLA-DPA1*02:01/DPB1*01:01;HLA-DQA1*04:01/DQB1*04:02;HLA-DQA1*05:01/DQB1*02:01;HLA-DQA1*03:01/DQB1*03:02;HLA-DPA1*01/DPB1*04:01;HLA-DRB1*01:01;HLA-DRB1*09:01    | 363-377   | HTL 11 |

|                     |    |    |                                                                                                                                                                                                                                            |           |        |
|---------------------|----|----|--------------------------------------------------------------------------------------------------------------------------------------------------------------------------------------------------------------------------------------------|-----------|--------|
| FIAGLIAIVM<br>VTIML | 10 | 24 | HLA-DQA1*05:01/DQB1*03:01;HLA-DPA1*03:01/DPB1*04:02;HLA-DRB4*01:01;HLA-DQA1*01:02/DQB1*06:02;HLA-DQA1*05:01/DQB1*02:01;HLA-DQA1*04:01/DQB1*04:02;HLA-DRB1*01:01;HLA-DPA1*02:01/DPB1*01:01;HLA-DPA1*01/DPB1*04:01;HLA-DRB1*09:01            | 1220-1234 | HTL 12 |
| DLCFTNVYA<br>DSFVIR | 10 | 24 | HLA-DQA1*01:01/DQB1*05:01;HLA-DPA1*01:03/DPB1*02:01;HLA-DQA1*05:01/DQB1*02:01;HLA-DPA1*01/DPB1*04:01;HLA-DRB3*01:01;HLA-DPA1*03:01/DPB1*04:02;HLA-DRB1*07:01;HLA-DPA1*02:01/DPB1*01:01;HLA-DQA1*01:02/DQB1*06:02;HLA-DPA1*02:01/DPB1*05:01 | 389-403   | HTL 13 |
| QPYRVVVL<br>FELLHA  | 10 | 24 | HLA-DPA1*03:01/DPB1*04:02;HLA-DPA1*02:01/DPB1*01:01;HLA-DPA1*01:03/DPB1*02:01;HLA-DPA1*01/DPB1*04:01;HLA-DPA1*02:01/DPB1*05:01;HLA-DRB4*01:01;HLA-DQA1*01:01/DQB1*05:01;HLA-DRB1*07:01;HLA-DQA1*05:01/DQB1*02:01;HLA-DQA1*03:01/DQB1*03:02 | 506-520   | HTL 14 |

|                      |    |    |                                                                                                                                                                                                                                 |         |        |
|----------------------|----|----|---------------------------------------------------------------------------------------------------------------------------------------------------------------------------------------------------------------------------------|---------|--------|
| RVVVLSEFEL<br>LHAPAT | 10 | 24 | HLA-DRB1*01:01;HLA-DPA1*02:01/DPB1*01:01;HLA-DPA1*03:01/DPB1*04:02;HLA-DPA1*01:03/DPB1*02:01;HLA-DPA1*01/DPB1*04:01;HLA-DPA1*02:01/DPB1*05:01;HLA-DQA1*01:01/DQB1*05:01;HLA-DRB4*01:01;HLA-DQA1*05:01/DQB1*02:01;HLA-DRB1*09:01 | 509-523 | HTL 15 |
| VVVLSFELL<br>HAPATV  | 10 | 24 | HLA-DRB1*01:01;HLA-DPA1*02:01/DPB1*01:01;HLA-DPA1*03:01/DPB1*04:02;HLA-DPA1*01:03/DPB1*02:01;HLA-DPA1*01/DPB1*04:01;HLA-DPA1*02:01/DPB1*05:01;HLA-DQA1*01:01/DQB1*05:01;HLA-DRB1*09:01;HLA-DQA1*05:01/DQB1*02:01;HLA-DRB4*01:01 | 510-524 | HTL 16 |
| MIAQYTSAL<br>LAGTIT  | 10 | 24 | HLA-DQA1*01:02/DQB1*06:02;HLA-DQA1*05:01/DQB1*03:01;HLA-DRB1*01:01;HLA-DPA1*03:01/DPB1*04:02;HLA-DRB1*09:01;HLA-DPA1*01/DPB1*04:01;HLA-DRB1*07:01;HLA-DPA1*02:01/DPB1*01:01;HLA-DPA1*02:01/DPB1*05:01;HLA-DPA1*01:03/DPB1*02:01 | 869-883 | HTL 17 |

|                     |    |    |                                                                                                                                                                                                                                            |           |        |
|---------------------|----|----|--------------------------------------------------------------------------------------------------------------------------------------------------------------------------------------------------------------------------------------------|-----------|--------|
| KWPWYIWL<br>GFIAGLI | 10 | 23 | HLA-DQA1*01:01/DQB1*05:01;HLA-DPA1*01:03/DPB1*02:01;HLA-DQA1*05:01/DQB1*02:01;HLA-DPA1*02:01/DPB1*01:01;HLA-DPA1*03:01/DPB1*04:02;HLA-DRB1*01:01;HLA-DRB1*07:01;HLA-DPA1*01/DPB1*04:01;HLA-DQA1*05:01/DQB1*03:01;HLA-DPA1*02:01/DPB1*05:01 | 1211-1225 | HTL 18 |
| PTNFTISVTT<br>EILPV | 10 | 23 | HLA-DRB1*07:01;HLA-DRB1*09:01;HLA-DQA1*03:01/DQB1*03:02;HLA-DQA1*05:01/DQB1*02:01;HLA-DPA1*02:01/DPB1*01:01;HLA-DPA1*01/DPB1*04:01;HLA-DPA1*03:01/DPB1*04:02;HLA-DRB3*01:01;HLA-DQA1*04:01/DQB1*04:02;HLA-DPA1*01:03/DPB1*02:01            | 715-729   | HTL 19 |
| LCFTNVYAD<br>SFVIRG | 9  | 24 | HLA-DQA1*01:01/DQB1*05:01;HLA-DPA1*01:03/DPB1*02:01;HLA-DQA1*05:01/DQB1*02:01;HLA-DPA1*03:01/DPB1*04:02;HLA-DPA1*01/DPB1*04:01;HLA-DRB3*01:01;HLA-DRB1*07:01;HLA-DPA1*02:01/DPB1*01:01;HLA-DQA1*03:01/DQB1*03:02                           | 390-404   | HTL 20 |



|                      |   |    |                                                                                                                                                                                                                             |         |        |
|----------------------|---|----|-----------------------------------------------------------------------------------------------------------------------------------------------------------------------------------------------------------------------------|---------|--------|
| STQDLFLPFF<br>SNVTW  | 9 | 24 | HLA-DPA1*01:03/DPB1*02:01;HLA-DPA1*02:01/DPB1*01:01;HLA-DPA1*03:01/DPB1*04:02;HLA-DPA1*01/DPB1*04:01;HLA-DQA1*01:01/DQB1*05:01;HLA-DPA1*02:01/DPB1*05:01;HLA-DRB1*01:01;HLA-DQA1*05:01/DQB1*02:01;HLA-DRB1*07:01            | 50-64   | HTL 21 |
| PYRVVVLSPF<br>ELLHAP | 9 | 24 | HLA-DPA1*03:01/DPB1*04:02;HLA-DPA1*02:01/DPB1*01:01;HLA-DPA1*01:03/DPB1*02:01;HLA-DPA1*01/DPB1*04:01;HLA-DPA1*02:01/DPB1*05:01;HLA-DRB4*01:01;HLA-DQA1*01:01/DQB1*05:01;HLA-DRB1*07:01;HLA-DQA1*05:01/DQB1*02:01            | 507-521 | HTL 22 |
| YRVVVLSPF<br>LLHAPA  | 9 | 24 | HLA-DPA1*03:01/DPB1*04:02;HLA-DPA1*02:01/DPB1*01:01;HLA-DPA1*01:03/DPB1*02:01;HLA-DPA1*01/DPB1*04:01;HLA-DPA1*02:01/DPB1*05:01;HLA-DRB4*01:01;HLA-DQA1*01:01/DQB1*05:01;HLA-DQA1*05:01/DQB1*02:01;HLA-DQA1*03:01/DQB1*03:02 | 508-522 | HTL 23 |

|                     |   |    |                                                                                                                                                                                                                  |           |        |
|---------------------|---|----|------------------------------------------------------------------------------------------------------------------------------------------------------------------------------------------------------------------|-----------|--------|
| FVFLVLLPL<br>VSSQCV | 9 | 23 | HLA-DRB1*01:01;HLA-DPA1*03:01/DPB1*04:02;HLA-DPA1*02:01/DPB1*01:01;HLA-DPA1*01/DPB1*04:01;HLA-DPA1*02:01/DPB1*05:01;HLA-DPA1*01:03/DPB1*02:01;HLA-DQA1*01:01/DQB1*05:01;HLA-DRB4*01:01;HLA-DQA1*05:01/DQB1*02:01 | Feb-16    | HTL 24 |
| GHQPYRVV<br>VLSFELL | 9 | 19 | HLA-DPA1*02:01/DPB1*01:01;HLA-DPA1*01:03/DPB1*02:01;HLA-DPA1*01/DPB1*04:01;HLA-DPA1*02:01/DPB1*05:01;HLA-DRB4*01:01;HLA-DPA1*03:01/DPB1*04:02;HLA-DRB1*07:01;HLA-DQA1*05:01/DQB1*02:01;HLA-DQA1*03:01/DQB1*03:02 | 504-518   | HTL 25 |
| IRAAEIRASA<br>NLAAT | 8 | 24 | HLA-DQA1*01:02/DQB1*06:02;HLA-DQA1*05:01/DQB1*03:01;HLA-DRB1*09:01;HLA-DRB4*01:01;HLA-DRB1*07:01;HLA-DQA1*03:01/DQB1*03:02;HLA-DQA1*04:01/DQB1*04:02;HLA-DRB1*01:01                                              | 1013-1027 | HTL 26 |

|                     |   |    |                                                                                                                                                                                        |           |        |
|---------------------|---|----|----------------------------------------------------------------------------------------------------------------------------------------------------------------------------------------|-----------|--------|
| HGVVFLHVT<br>YVPAQE | 8 | 24 | HLA-DPA1*01:03/DPB1*02:01;HLA-DPA1*01/DPB1*04:01;HLA-DRB1*01:01;HLA-DQA1*05:01/DQB1*02:01;HLA-DRB1*07:01;HLA-DPA1*03:01/DPB1*04:02;HLA-DPA1*02:01/DPB1*01:01;HLA-DQA1*03:01/DQB1*03:02 | 1058-1072 | HTL 27 |
| IAGLIAIVMV<br>TIMLC | 8 | 24 | HLA-DQA1*01:02/DQB1*06:02;HLA-DPA1*03:01/DPB1*04:02;HLA-DRB4*01:01;HLA-DPA1*02:01/DPB1*01:01;HLA-DQA1*05:01/DQB1*03:01;HLA-DRB1*01:01;HLA-DPA1*01/DPB1*04:01;HLA-DQA1*04:01/DQB1*04:02 | 1221-1235 | HTL 28 |
| CTFEYVSQP<br>FLMDLE | 8 | 24 | HLA-DPA1*01:03/DPB1*02:01;HLA-DPA1*02:01/DPB1*01:01;HLA-DPA1*03:01/DPB1*04:02;HLA-DQA1*05:01/DQB1*02:01;HLA-DRB1*09:01;HLA-DRB1*07:01;HLA-DQA1*01:01/DQB1*05:01;HLA-DRB1*01:01         | 166-180   | HTL 29 |
| AAYYVGYL<br>QPRTFLL | 8 | 24 | HLA-DRB1*01:01;HLA-DPA1*02:01/DPB1*01:01;HLA-DPA1*01:03/DPB1*02:01;HLA-DPA1*02:01/DPB1*05:01;HLA-DRB1*07:01;HLA-DPA1*01/DPB1*04:01;HLA-DPA1*03:01/DPB1*04:02;HLA-DRB1*09:01            | 263-277   | HTL 30 |

|                     |   |    |                                                                                                                                                                                                            |         |        |
|---------------------|---|----|------------------------------------------------------------------------------------------------------------------------------------------------------------------------------------------------------------|---------|--------|
| AYYVGYLQ<br>PRTFLLK | 8 | 24 | HLA-DPA1*01:03/DPB1*02:01;HLA-<br>DRB1*01:01;HLA-DPA1*02:01/DPB1*05:01;HLA-<br>DPA1*02:01/DPB1*01:01;HLA-<br>DPA1*03:01/DPB1*04:02;HLA-<br>DPA1*01/DPB1*04:01;HLA-DRB1*07:01;HLA-<br>DRB1*09:01            | 264-278 | HTL 31 |
| KGIYQTSNF<br>RVQPTE | 8 | 24 | HLA-DPA1*01/DPB1*04:01;HLA-<br>DPA1*02:01/DPB1*01:01;HLA-<br>DQA1*01:02/DQB1*06:02;HLA-DRB1*07:01;HLA-<br>DPA1*02:01/DPB1*05:01;HLA-<br>DPA1*01:03/DPB1*02:01;HLA-<br>DQA1*01:01/DQB1*05:01;HLA-DRB1*01:01 | 310-324 | HTL 32 |
| IYQTSNFRV<br>QPTESI | 8 | 24 | HLA-DRB3*01:01;HLA-DRB1*07:01;HLA-<br>DRB4*01:01;HLA-DQA1*01:02/DQB1*06:02;HLA-<br>DPA1*03:01/DPB1*04:02;HLA-<br>DPA1*01/DPB1*04:01;HLA-<br>DQA1*01:01/DQB1*05:01;HLA-<br>DPA1*02:01/DPB1*01:01            | 312-326 | HTL 33 |

|                     |   |    |                                                                                                                                                                                                   |         |        |
|---------------------|---|----|---------------------------------------------------------------------------------------------------------------------------------------------------------------------------------------------------|---------|--------|
| MFVFLVLLP<br>LVSSQC | 8 | 23 | HLA-DRB1*01:01;HLA-DPA1*03:01/DPB1*04:02;HLA-DPA1*02:01/DPB1*01:01;HLA-DPA1*01/DPB1*04:01;HLA-DPA1*02:01/DPB1*05:01;HLA-DPA1*01:03/DPB1*02:01;HLA-DQA1*05:01/DQB1*02:01;HLA-DQA1*01:01/DQB1*05:01 | Jan-15  | HTL 34 |
| GINITRFQTL<br>LALHR | 8 | 23 | HLA-DRB4*01:01;HLA-DPA1*03:01/DPB1*04:02;HLA-DPA1*02:01/DPB1*05:01;HLA-DPA1*01/DPB1*04:01;HLA-DPA1*01:03/DPB1*02:01;HLA-DPA1*02:01/DPB1*01:01;HLA-DRB1*01:01;HLA-DRB1*07:01                       | 232-246 | HTL 35 |
| SQSIIAYTMS<br>LGAEN | 8 | 23 | HLA-DRB1*09:01;HLA-DQA1*01:02/DQB1*06:02;HLA-DQA1*03:01/DQB1*03:02;HLA-DQA1*05:01/DQB1*02:01;HLA-DRB1*07:01;HLA-DPA1*03:01/DPB1*04:02;HLA-DQA1*04:01/DQB1*04:02;HLA-DRB1*01:01                    | 689-703 | HTL 36 |

|                    |   |    |                                                                                                                                                                                |         |        |
|--------------------|---|----|--------------------------------------------------------------------------------------------------------------------------------------------------------------------------------|---------|--------|
| QSIAYTMSL<br>GAENS | 8 | 22 | HLA-DRB1*09:01;HLA-DQA1*01:02/DQB1*06:02;HLA-DRB1*07:01;HLA-DQA1*03:01/DQB1*03:02;HLA-DPA1*03:01/DPB1*04:02;HLA-DRB1*01:01;HLA-DQA1*04:01/DQB1*04:02;HLA-DQA1*05:01/DQB1*02:01 | 690-704 | HTL 37 |
| TQKRALTG<br>IAVEQD | 8 | 17 | HLA-DQA1*03:01/DQB1*03:02;HLA-DQA1*04:01/DQB1*04:02;HLA-DQA1*01:02/DQB1*06:02;HLA-DRB1*01:01;HLA-DRB1*09:01;HLA-DQA1*05:01/DQB1*02:01;HLA-DRB4*01:01;HLA-DQA1*05:01/DQB1*03:01 | 761-775 | HTL 38 |
| QKRALTGI<br>AVEQDK | 8 | 17 | HLA-DQA1*03:01/DQB1*03:02;HLA-DQA1*04:01/DQB1*04:02;HLA-DQA1*01:02/DQB1*06:02;HLA-DRB1*01:01;HLA-DRB1*09:01;HLA-DQA1*05:01/DQB1*02:01;HLA-DRB4*01:01;HLA-DQA1*05:01/DQB1*03:01 | 762-776 | HTL 39 |

|                     |   |    |                                                                                                                                                                                |         |        |
|---------------------|---|----|--------------------------------------------------------------------------------------------------------------------------------------------------------------------------------|---------|--------|
| LKRALTGIA<br>VEQDKN | 8 | 17 | HLA-DQA1*04:01/DQB1*04:02;HLA-DQA1*03:01/DQB1*03:02;HLA-DQA1*01:02/DQB1*06:02;HLA-DRB1*01:01;HLA-DQA1*05:01/DQB1*02:01;HLA-DRB4*01:01;HLA-DQA1*05:01/DQB1*03:01;HLA-DRB1*09:01 | 763-777 | HTL 40 |
| WTAGAAAY<br>YVGYLQP | 7 | 24 | HLA-DQA1*05:01/DQB1*03:01;HLA-DPA1*01:03/DPB1*02:01;HLA-DQA1*01:02/DQB1*06:02;HLA-DQA1*04:01/DQB1*04:02;HLA-DQA1*01:01/DQB1*05:01;HLA-DRB1*09:01;HLA-DPA1*01/DPB1*04:01        | 258-272 | HTL 41 |
| AAAYYVGY<br>LQPRTFL | 7 | 24 | HLA-DPA1*01:03/DPB1*02:01;HLA-DPA1*02:01/DPB1*01:01;HLA-DPA1*01/DPB1*04:01;HLA-DPA1*02:01/DPB1*05:01;HLA-DQA1*01:01/DQB1*05:01;HLA-DRB1*01:01;HLA-DRB1*09:01                   | 262-276 | HTL 42 |
| YVGYLQPRT<br>FLLKYN | 7 | 24 | HLA-DPA1*02:01/DPB1*05:01;HLA-DPA1*01:03/DPB1*02:01;HLA-DRB1*01:01;HLA-DPA1*01/DPB1*04:01;HLA-DPA1*02:01/DPB1*01:01;HLA-DPA1*03:01/DPB1*04:02;HLA-DRB1*07:01                   | 266-280 | HTL 43 |

|                     |   |    |                                                                                                                                                                 |         |        |
|---------------------|---|----|-----------------------------------------------------------------------------------------------------------------------------------------------------------------|---------|--------|
| NDLCFTNVY<br>ADSFVI | 7 | 24 | HLA-DRB1*07:01;HLA-DRB3*01:01;HLA-DPA1*01:03/DPB1*02:01;HLA-DQA1*01:01/DQB1*05:01;HLA-DQA1*05:01/DQB1*02:01;HLA-DQA1*04:01/DQB1*04:02;HLA-DQA1*03:01/DQB1*03:02 | 388-402 | HTL 44 |
| VVLSFELLH<br>APATVC | 7 | 24 | HLA-DRB1*01:01;HLA-DRB1*09:01;HLA-DPA1*03:01/DPB1*04:02;HLA-DQA1*01:01/DQB1*05:01;HLA-DPA1*02:01/DPB1*01:01;HLA-DRB1*07:01;HLA-DPA1*01/DPB1*04:01               | 511-525 | HTL 45 |
| IAQYTSALL<br>AGTITS | 7 | 24 | HLA-DQA1*01:02/DQB1*06:02;HLA-DQA1*05:01/DQB1*03:01;HLA-DRB1*01:01;HLA-DPA1*03:01/DPB1*04:02;HLA-DRB1*09:01;HLA-DPA1*02:01/DPB1*05:01;HLA-DRB1*07:01            | 870-884 | HTL 46 |



|                     |   |    |                                                                                                                                                                                    |           |        |
|---------------------|---|----|------------------------------------------------------------------------------------------------------------------------------------------------------------------------------------|-----------|--------|
| YIKWPWYI<br>WLGFIAG | 7 | 23 | HLA-DPA1*01:03/DPB1*02:01;HLA-DPA1*02:01/DPB1*01:01;HLA-DQA1*01:01/DQB1*05:01;HLA-DPA1*02:01/DPB1*05:01;HLA-DPA1*01/DPB1*04:01;HLA-DPA1*03:01/DPB1*04:02;HLA-DQA1*05:01/DQB1*02:01 | 1209-1223 | HTL 47 |
| IKWPWYIWL<br>GFIAGL | 7 | 23 | HLA-DPA1*01:03/DPB1*02:01;HLA-DPA1*02:01/DPB1*01:01;HLA-DQA1*01:01/DQB1*05:01;HLA-DPA1*02:01/DPB1*05:01;HLA-DPA1*03:01/DPB1*04:02;HLA-DPA1*01/DPB1*04:01;HLA-DQA1*05:01/DQB1*02:01 | 1210-1224 | HTL 48 |
| ASQSIIAYTM<br>SLGAE | 7 | 23 | HLA-DQA1*01:02/DQB1*06:02;HLA-DRB1*07:01;HLA-DQA1*03:01/DQB1*03:02;HLA-DQA1*04:01/DQB1*04:02;HLA-DPA1*03:01/DPB1*04:02;HLA-DQA1*05:01/DQB1*03:01;HLA-DRB1*01:01                    | 688-702   | HTL 49 |
| SGWTAGAA<br>AYYVGYL | 7 | 20 | HLA-DQA1*05:01/DQB1*03:01;HLA-DRB1*09:01;HLA-DQA1*04:01/DQB1*04:02;HLA-DRB1*01:01;HLA-DQA1*01:02/DQB1*06:02;HLA-DQA1*01:01/DQB1*05:01;HLA-DQA1*05:01/DQB1*02:01                    | 256-270   | HTL 50 |

|                     |   |    |                                                                                                                                                                                             |         |        |
|---------------------|---|----|---------------------------------------------------------------------------------------------------------------------------------------------------------------------------------------------|---------|--------|
| VGHPYRV<br>VVSFEL   | 7 | 19 | HLA-DPA1*01:03/DPB1*02:01;HLA-<br>DRB1*07:01;HLA-DPA1*02:01/DPB1*05:01;HLA-<br>DQA1*03:01/DQB1*03:02;HLA-<br>DQA1*05:01/DQB1*02:01;HLA-<br>DPA1*02:01/DPB1*01:01;HLA-<br>DPA1*01/DPB1*04:01 | 503-517 | HTL 51 |
| CTQLKRALT<br>GIAVEQ | 7 | 17 | HLA-DQA1*04:01/DQB1*04:02;HLA-<br>DRB1*09:01;HLA-DRB1*01:01;HLA-<br>DQA1*03:01/DQB1*03:02;HLA-<br>DQA1*01:02/DQB1*06:02;HLA-DRB4*01:01;HLA-<br>DQA1*05:01/DQB1*03:01                        | 760-774 | HTL 52 |
