# Supplementary material for: An Immunoinformatics Approach for Identifying and Designing Conserved Multi-Epitope Vaccines for Coronaviruses
Source: Preprints.org preprint supplement (doi:10.20944/preprints202409.0239.v1), 2024-09-03

O24248|PRU1\_PRUAV/1-160 MG V F T Y E S E F T S E I P P P R L F K A F V L D A D N L V P K I A P Q A I K H S E I L E G D G G P G  
Epi1/1-39 - - - - - S G W - - - - -

Conservation

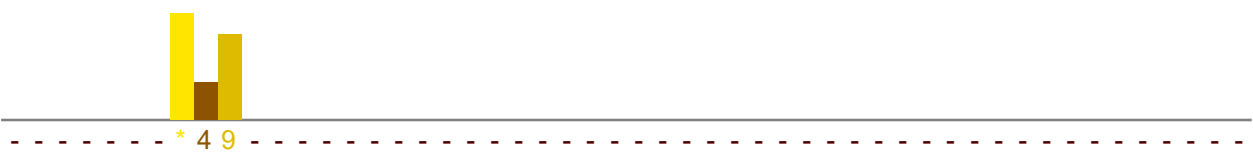

Quality

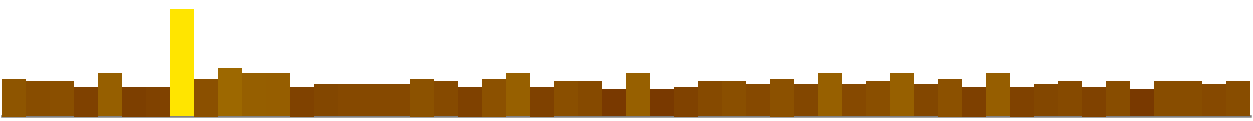

Consensus

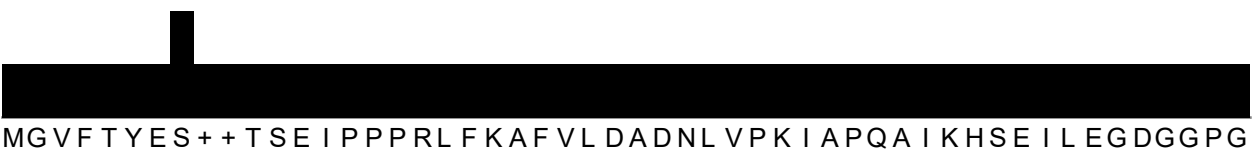

Occupancy

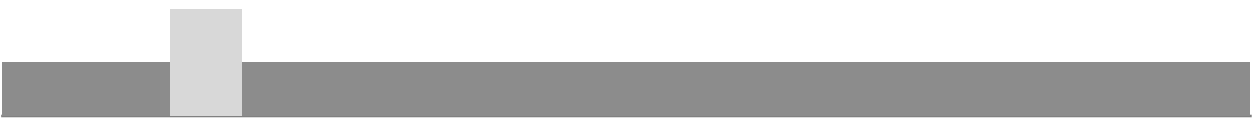

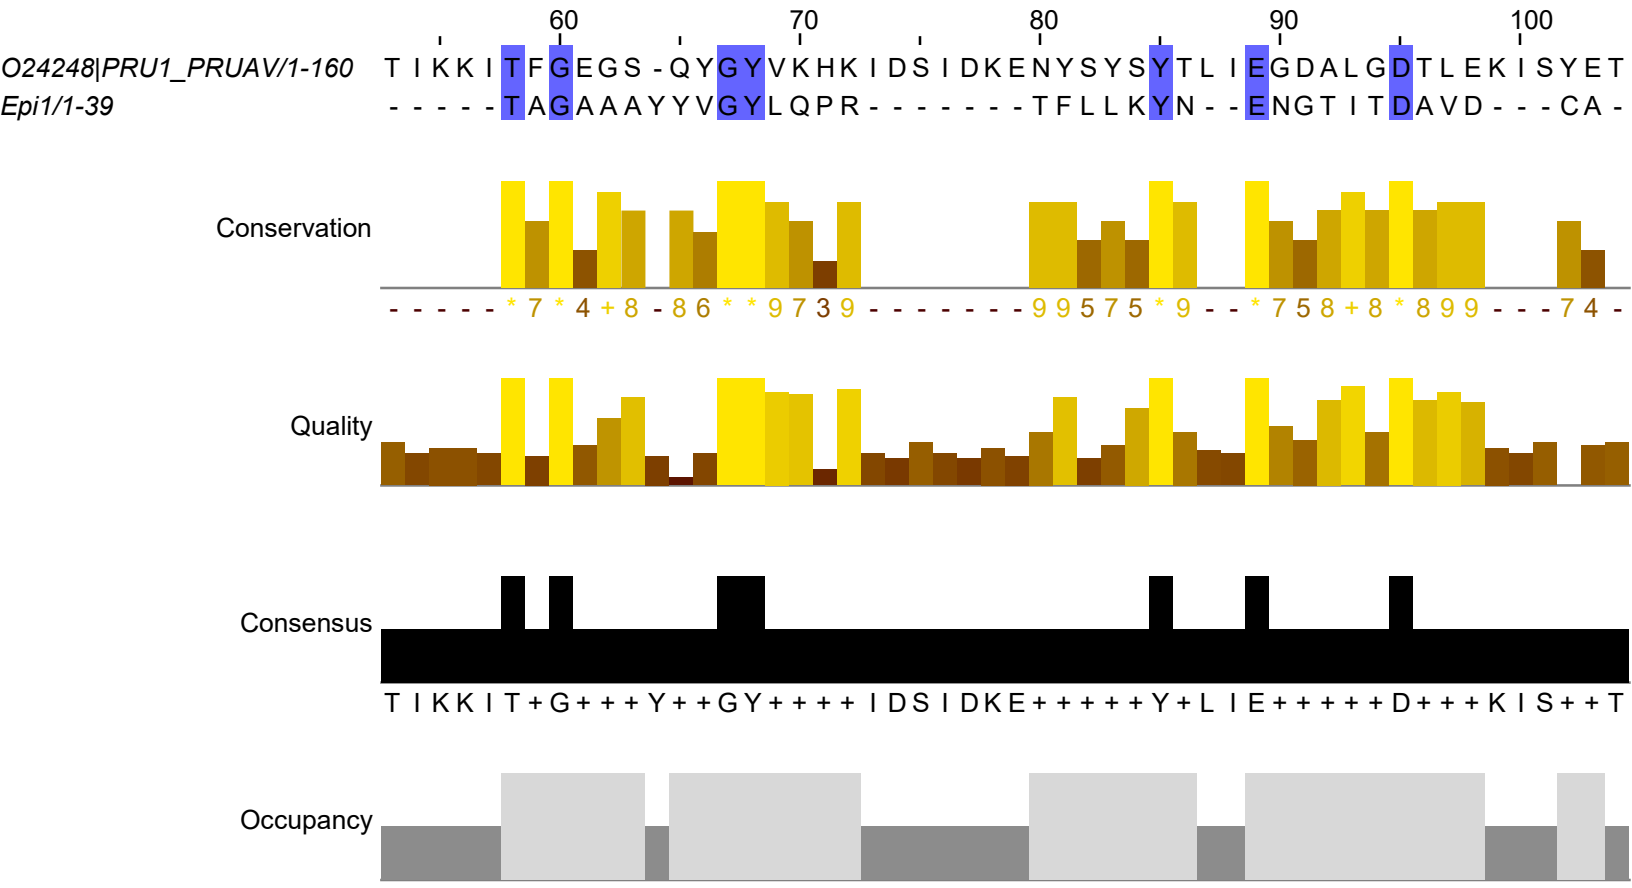

O24248|PRU1\_PRUAV/1-160  
Epi1/1-39

110 120 130 140 150

KLVASPSGGSIIKSTSHYHTKGNVEIKEEHVKAGKEKASNLFKLIETYLKGH

-----LD-----

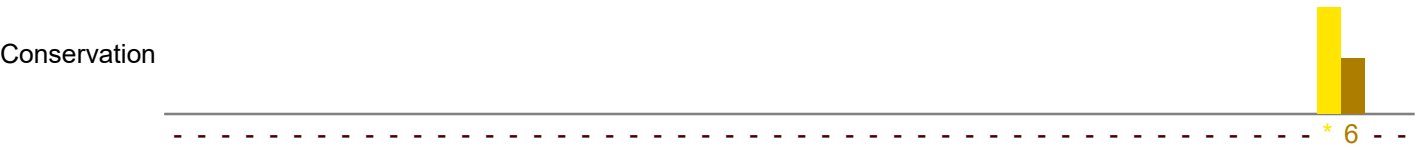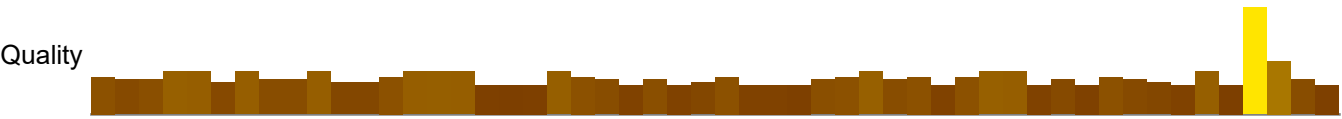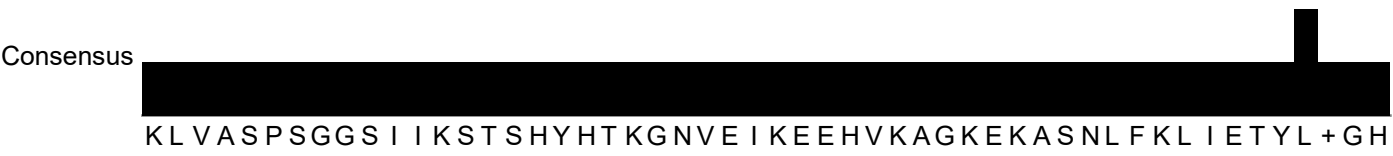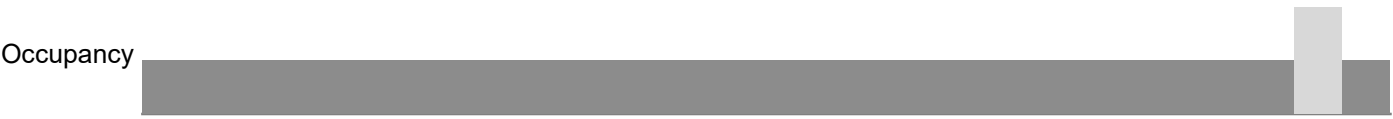

O24248|PRU1\_PRUAV/1-160 P D A Y N  
Epi1/1-39 - - - - -

Conservation

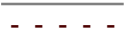

Quality

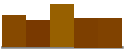

Consensus

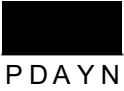

Occupancy

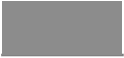

Supplement: Supplementary file 6 [file supplementary]
